# Supplementary material
Source: publisher figshare collection journal article supplement (https://acs.figshare.com/ndownloader/files/21301464)
Supplement: Supplementary file 1 [file 21301464]

## Sheet: Title
SUPPORTING INFORMATION
Toward Rational Functionalization of Ionic Liquids for Enhanced Extractive Desulfurization: Computer-Aided Solvent Design and Molecular Dynamics Simulation
Jingwen Wang,a Zhen Song,b,c,* Xinxin Li,a Hongye Cheng,a Lifang Chen,a and Zhiwen Qia,*
a State Key Laboratory of Chemical Engineering, East China University of Science and Technology, 130 Meilong Road, 200237, Shanghai, China b Process Systems Engineering, Max Planck Institute for Dynamics of Complex Technical Systems, Sandtorstrasse 1, D-39106, Magdeburg, Germany c Process Systems Engineering, Otto-von-Guericke University Magdeburg, Universitätsplatz 2, D-39106 Magdeburg, Germany
*E-mail: songz@mpi-magdeburg.mpg.de, zwqi@ecust.edu.cn
Number of Tables: 5 (Table S1-S5)

## Sheet: Contents
Contents
Table S1. Rk and Qk for groups involved in the extended UNIFAC-IL model.
Table S2. Comparison of experimental and UNIFAC-IL calculated γ∞ for alcohols, ethers, olefins, and acetonitrile in ILs.
Table S3. Detailed ternary LLE database used for UNIFAC-IL validation.
Table S4. Detailed binary LLE database used for UNIFAC-IL validation.
Table S5. Interaction energies for cation – thiophene and anion – thiophene in the {functional/conventional IL + model fuel oil} systems.

## Sheet: Table S1
Table S1. Rk and Qk for groups involved in the extended UNIFAC-IL model.
Group No.	Main group	Subgroup	Rk	Qk	References
1	CH2	CH3	0.9011	0.848	(45)
		CH2	0.6744	0.54	(45)
		CH	0.4469	0.228	(45)
		C	0.2195	0.003	(45)
2	ACH	ACH	0.5313	0.4	(45)
		AC	0.3652	0.12	(45)
3	ACCH2	ACCH3	1.2663	0.968	(45)
		ACCH2	1.0396	0.66	(45)
4	OH	OH	1	1.2	(45)
5	OCH3	OCH3	1.145	1.088	(45)
		OCH2	0.9183	0.78	(45)
		OCH	0.6908	0.468	(45)
6	CH2=CH	CH2=CH	1.3454	1.176	(45)
		CH=CH	1.1167	0.867	(45)
7	CH2CN	CH3CN	1.8701	1.724	(45)
		CH2CN	1.6434	1.416	(45)
8	[Cl]	[Cl]	0.766	0.72	(29)
9	[BF4]	[BF4]	1.7856	1.494	(29)
10	[PF6]	[PF6]	7.0615	6.5787	(29)
11	[FAP]	[FAP]	9.4117	7.7294	(29)
12	[NTf2]	[NTf2]	5.7738	4.932	(29)
13	[SCN]	[SCN]	1.9446	1.1752	(29)
14	[N(CN)2]	[N(CN)2]	2.4171	2.1337	(30)
15	[C(CN)3]	[C(CN)3]	3.3326	2.8661	(30)
16	[B(CN)4]	[B(CN)4]	4.3314	3.6652	(30)
17	[NO3]	[NO3]	1.6611	1.5289	(30)
18	[CF3SO3]	CF3SO3]	3.4745	2.9796	(30)
19	[CH3SO3]	[CH3SO3]	2.7126	2.3701	(30)
20	[TOS]	[TOS]	5.4854	4.5884	(30)
21	[Im]	[Im]	1.9471	0.866	(29)
		[MIm]	2.8482	1.714	(29)
22	[Py]	[Py]	2.667	1.553	(29)
		[MPy]	3.5681	2.401	(29)
23	[Pyrro]	[Pyrro]	2.4862	2.189	(30)
		[MPyrr]	3.3873	2.9098	(30)
24	[Pip]	[Pip]	2.9438	2.555	(30)
		[MPip]	3.8449	3.2759	(30)
25	[Mmorp]	[Mmorp]	3.4815	2.9852	(30)
26	[iQui]	[iQui]	7.3908	6.1126	(30)
27	[N]	[CH3N]	1.1865	0.94	(29)
		[C2H5N]	1.8609	1.48	(30)
		[C3H7N]	2.5353	2.02	(30)
		[C4H9N]	3.2097	2.56	(30)
Note: the No. of the references in this table are listed in the main text.

## Sheet: Table S2
Table S2. Comparison of experimental and UNIFAC-IL calculated γ∞ for alcohols, ethers, olefins, and acetonitrile in ILs.
IL	T/K	Experimental γ∞											Calculated γ∞											MAPEs											References
		ethanol	1-propanol	1-butanol	MTBE	TBEE	TAME	DE	1-hexene	1-heptene	1-octene	Acetonitrile	ethanol	1-propanol	1-butanol	MTBE	TBEE	TAME	DE	1-hexene	1-heptene	1-octene	Acetonitrile	ethanol	1-propanol	1-butanol	MTBE	TBEE	TAME	DE	1-hexene	1-heptene	1-octene	Acetonitrile
[C4MPip][SCN]	318.15	0.639	N.A	N.A	13.1	N.A	N.A	11.9	40.9	60.4	89.6	N.A	0.6076	N.A	N.A	13.25	N.A	N.A	7.364	14.29	23.79	38.98	N.A	-0.0491393	N.A	N.A	0.0114504	N.A	N.A	-0.381176	-0.650611	-0.606126	-0.564955	N.A	Urszula Domańska, and Marta Królikowska. Measurements of Activity Coefficients at Infinite Dilution for Organic Solutes and Water in the Ionic Liquid 1-Butyl-1-methylpiperidinium Thiocyanate. J. Chem. Eng. Data 2011, 56: 124–129
[C4MPip][SCN]	328.15	0.627	N.A	N.A	12.7	N.A	N.A	11.5	36.7	55.7	83	N.A	0.6339	N.A	N.A	12.8	N.A	N.A	7.17	14.05	23.29	37.99	N.A	0.0110048	N.A	N.A	0.00787402	N.A	N.A	-0.376522	-0.617166	-0.581867	-0.542289	N.A	Urszula Domańska, and Marta Królikowska. Measurements of Activity Coefficients at Infinite Dilution for Organic Solutes and Water in the Ionic Liquid 1-Butyl-1-methylpiperidinium Thiocyanate. J. Chem. Eng. Data 2011, 56: 124–129
[C4MPip][SCN]	338.15	0.616	N.A	N.A	12.3	N.A	N.A	11	34.5	51.9	77	N.A	0.6585	N.A	N.A	12.39	N.A	N.A	6.987	13.82	22.8	37.03	N.A	0.0689935	N.A	N.A	0.00731707	N.A	N.A	-0.364818	-0.59942	-0.560694	-0.519091	N.A	Urszula Domańska, and Marta Królikowska. Measurements of Activity Coefficients at Infinite Dilution for Organic Solutes and Water in the Ionic Liquid 1-Butyl-1-methylpiperidinium Thiocyanate. J. Chem. Eng. Data 2011, 56: 124–129
[C4MPip][SCN]	348.15	0.606	N.A	N.A	12	N.A	N.A	10.7	32.1	48.1	71.3	N.A	0.6816	N.A	N.A	12	N.A	N.A	6.813	13.59	22.33	36.11	N.A	0.124752	N.A	N.A	0	N.A	N.A	-0.363271	-0.576636	-0.535759	-0.493548	N.A	Urszula Domańska, and Marta Królikowska. Measurements of Activity Coefficients at Infinite Dilution for Organic Solutes and Water in the Ionic Liquid 1-Butyl-1-methylpiperidinium Thiocyanate. J. Chem. Eng. Data 2011, 56: 124–129
[C4MPip][SCN]	358.15	0.599	N.A	N.A	11.7	N.A	N.A	10.4	30.2	45.9	67.2	N.A	0.7032	N.A	N.A	11.64	N.A	N.A	6.648	13.37	21.87	35.22	N.A	0.173957	N.A	N.A	-0.00512821	N.A	N.A	-0.360769	-0.557285	-0.523529	-0.475893	N.A	Urszula Domańska, and Marta Królikowska. Measurements of Activity Coefficients at Infinite Dilution for Organic Solutes and Water in the Ionic Liquid 1-Butyl-1-methylpiperidinium Thiocyanate. J. Chem. Eng. Data 2011, 56: 124–129
[C4MPy][SCN]	298.15	0.698	N.A	N.A	10.8	N.A	N.A	10.3	36.8	54.6	90.1	N.A	0.3856	N.A	N.A	10.75	N.A	N.A	6.537	25.15	42.44	70.52	N.A	-0.447564	N.A	N.A	-0.00462963	N.A	N.A	-0.36534	-0.316576	-0.222711	-0.217314	N.A	Urszula Domańska, and Marta Królikowska. Measurements of Activity Coefficients at Infinite Dilution in Solvent Mixtures with Thiocyanate-Based Ionic Liquids Using GLC Technique. J. Phys. Chem. B 2010, 114: 8460–8466
[C4MPy][SCN]	308.15	0.669	N.A	N.A	10.6	N.A	N.A	9.97	34.1	50.9	83.2	N.A	0.4164	N.A	N.A	10.6	N.A	N.A	6.473	24.83	41.85	69.43	N.A	-0.377578	N.A	N.A	0	N.A	N.A	-0.350752	-0.271848	-0.1778	-0.165505	N.A	Urszula Domańska, and Marta Królikowska. Measurements of Activity Coefficients at Infinite Dilution in Solvent Mixtures with Thiocyanate-Based Ionic Liquids Using GLC Technique. J. Phys. Chem. B 2010, 114: 8460–8466
[C4MPy][SCN]	318.15	0.648	N.A	N.A	10.5	N.A	N.A	9.68	31.8	47.3	76.6	N.A	0.4465	N.A	N.A	10.46	N.A	N.A	6.41	24.53	41.28	68.37	N.A	-0.310957	N.A	N.A	-0.00380952	N.A	N.A	-0.33781	-0.228616	-0.127273	-0.107441	N.A	Urszula Domańska, and Marta Królikowska. Measurements of Activity Coefficients at Infinite Dilution in Solvent Mixtures with Thiocyanate-Based Ionic Liquids Using GLC Technique. J. Phys. Chem. B 2010, 114: 8460–8466
[C4MPy][SCN]	328.15	0.626	N.A	N.A	10.3	N.A	N.A	9.41	29.9	44.6	71	N.A	0.4758	N.A	N.A	10.33	N.A	N.A	6.35	24.23	40.71	67.32	N.A	-0.239936	N.A	N.A	0.00291262	N.A	N.A	-0.325186	-0.189632	-0.0872197	-0.051831	N.A	Urszula Domańska, and Marta Królikowska. Measurements of Activity Coefficients at Infinite Dilution in Solvent Mixtures with Thiocyanate-Based Ionic Liquids Using GLC Technique. J. Phys. Chem. B 2010, 114: 8460–8466
[C4MPy][SCN]	338.15	0.603	N.A	N.A	10.2	N.A	N.A	9.12	28	41.7	66.3	N.A	0.5043	N.A	N.A	10.2	N.A	N.A	6.292	23.94	40.16	66.3	N.A	-0.163682	N.A	N.A	0	N.A	N.A	-0.310088	-0.145	-0.0369305	0	N.A	Urszula Domańska, and Marta Królikowska. Measurements of Activity Coefficients at Infinite Dilution in Solvent Mixtures with Thiocyanate-Based Ionic Liquids Using GLC Technique. J. Phys. Chem. B 2010, 114: 8460–8466
[C4MPy][SCN]	348.15	0.587	N.A	N.A	10	N.A	N.A	9.03	26.5	39.6	62.1	N.A	0.532	N.A	N.A	10.08	N.A	N.A	6.236	23.66	39.62	65.3	N.A	-0.0936968	N.A	N.A	0.008	N.A	N.A	-0.309413	-0.10717	0.000505051	0.0515298	N.A	Urszula Domańska, and Marta Królikowska. Measurements of Activity Coefficients at Infinite Dilution in Solvent Mixtures with Thiocyanate-Based Ionic Liquids Using GLC Technique. J. Phys. Chem. B 2010, 114: 8460–8466
[C4MPy][SCN]	358.15	0.573	N.A	N.A	9.87	N.A	N.A	8.8	25.2	37.7	58.6	N.A	0.5588	N.A	N.A	9.962	N.A	N.A	6.181	23.38	39.09	64.32	N.A	-0.0247818	N.A	N.A	0.00932118	N.A	N.A	-0.297614	-0.0722222	0.03687	0.0976109	N.A	Urszula Domańska, and Marta Królikowska. Measurements of Activity Coefficients at Infinite Dilution in Solvent Mixtures with Thiocyanate-Based Ionic Liquids Using GLC Technique. J. Phys. Chem. B 2010, 114: 8460–8466
[C4MPy][SCN]	368.15	0.558	N.A	N.A	N.A	N.A	N.A	N.A	N.A	N.A	N.A	N.A	0.5847	N.A	N.A	N.A	N.A	N.A	N.A	N.A	N.A	N.A	N.A	0.0478495	N.A	N.A	N.A	N.A	N.A	N.A	N.A	N.A	N.A	N.A	Urszula Domańska, and Marta Królikowska. Measurements of Activity Coefficients at Infinite Dilution in Solvent Mixtures with Thiocyanate-Based Ionic Liquids Using GLC Technique. J. Phys. Chem. B 2010, 114: 8460–8466
[C4MPyr][SCN]	298.15	0.601	N.A	N.A	11.27	N.A	N.A	11.04	40.58	62.49	96.61	N.A	0.4475	N.A	N.A	11.27	N.A	N.A	6.731	17.09	28.93	48.2	N.A	-0.255408	N.A	N.A	0	N.A	N.A	-0.390308	-0.578857	-0.537046	-0.501087	N.A	Urszula Domańska, and Marta Królikowska. Measurements of Activity Coefficients at Infinite Dilution in Solvent Mixtures with Thiocyanate-Based Ionic Liquids Using GLC Technique. J. Phys. Chem. B 2010, 114: 8460–8466
[C4MPyr][SCN]	308.15	0.592	N.A	N.A	11.23	N.A	N.A	10.83	38.02	58.44	89.91	N.A	0.4754	N.A	N.A	11.26	N.A	N.A	6.718	16.78	28.3	46.99	N.A	-0.196959	N.A	N.A	0.00267142	N.A	N.A	-0.379686	-0.558653	-0.515743	-0.477366	N.A	Urszula Domańska, and Marta Królikowska. Measurements of Activity Coefficients at Infinite Dilution in Solvent Mixtures with Thiocyanate-Based Ionic Liquids Using GLC Technique. J. Phys. Chem. B 2010, 114: 8460–8466
[C4MPyr][SCN]	318.15	0.585	N.A	N.A	11.17	N.A	N.A	10.6	35.86	55.32	84.41	N.A	0.5021	N.A	N.A	11.24	N.A	N.A	6.697	16.47	27.68	45.81	N.A	-0.141709	N.A	N.A	0.00626679	N.A	N.A	-0.368208	-0.540714	-0.499638	-0.457292	N.A	Urszula Domańska, and Marta Królikowska. Measurements of Activity Coefficients at Infinite Dilution in Solvent Mixtures with Thiocyanate-Based Ionic Liquids Using GLC Technique. J. Phys. Chem. B 2010, 114: 8460–8466
[C4MPyr][SCN]	328.15	0.577	N.A	N.A	11.14	N.A	N.A	10.33	33.67	51.72	78.45	N.A	0.5276	N.A	N.A	11.19	N.A	N.A	6.668	16.16	27.08	44.65	N.A	-0.0856153	N.A	N.A	0.00448833	N.A	N.A	-0.354501	-0.520048	-0.476411	-0.430848	N.A	Urszula Domańska, and Marta Królikowska. Measurements of Activity Coefficients at Infinite Dilution in Solvent Mixtures with Thiocyanate-Based Ionic Liquids Using GLC Technique. J. Phys. Chem. B 2010, 114: 8460–8466
[C4MPyr][SCN]	338.15	0.571	N.A	N.A	11.09	N.A	N.A	10.15	32.03	49.45	74.47	N.A	0.5519	N.A	N.A	11.14	N.A	N.A	6.633	15.86	26.48	43.51	N.A	-0.0334501	N.A	N.A	0.00450857	N.A	N.A	-0.346502	-0.504839	-0.46451	-0.415738	N.A	Urszula Domańska, and Marta Królikowska. Measurements of Activity Coefficients at Infinite Dilution in Solvent Mixtures with Thiocyanate-Based Ionic Liquids Using GLC Technique. J. Phys. Chem. B 2010, 114: 8460–8466
[C4MPyr][SCN]	348.15	0.564	N.A	N.A	11.07	N.A	N.A	9.95	30.41	46.68	70.12	N.A	0.5749	N.A	N.A	11.07	N.A	N.A	6.592	15.56	25.9	42.41	N.A	0.0193262	N.A	N.A	0	N.A	N.A	-0.337487	-0.488326	-0.445159	-0.39518	N.A	Urszula Domańska, and Marta Królikowska. Measurements of Activity Coefficients at Infinite Dilution in Solvent Mixtures with Thiocyanate-Based Ionic Liquids Using GLC Technique. J. Phys. Chem. B 2010, 114: 8460–8466
[C4MPyr][SCN]	358.15	0.558	N.A	N.A	11.04	N.A	N.A	9.75	29.05	44.55	66.68	N.A	0.5969	N.A	N.A	10.99	N.A	N.A	6.546	15.27	25.33	41.33	N.A	0.0697133	N.A	N.A	-0.00452899	N.A	N.A	-0.328615	-0.474355	-0.431425	-0.380174	N.A	Urszula Domańska, and Marta Królikowska. Measurements of Activity Coefficients at Infinite Dilution in Solvent Mixtures with Thiocyanate-Based Ionic Liquids Using GLC Technique. J. Phys. Chem. B 2010, 114: 8460–8466
[C4MPyr][SCN]	368.15	0.552	N.A	N.A	N.A	N.A	N.A	N.A	N.A	N.A	N.A	N.A	0.6176	N.A	N.A	N.A	N.A	N.A	N.A	N.A	N.A	N.A	N.A	0.118841	N.A	N.A	N.A	N.A	N.A	N.A	N.A	N.A	N.A	N.A	Urszula Domańska, and Marta Królikowska. Measurements of Activity Coefficients at Infinite Dilution in Solvent Mixtures with Thiocyanate-Based Ionic Liquids Using GLC Technique. J. Phys. Chem. B 2010, 114: 8460–8466
[C4MIm][SCN]	298.15	0.743	N.A	N.A	12.841	N.A	N.A	N.A	61.6	81.1	111	N.A	0.4965	N.A	N.A	11.88	N.A	N.A	N.A	20.45	33.32	53.44	N.A	-0.331763	N.A	N.A	-0.0748384	N.A	N.A	N.A	-0.668019	-0.589149	-0.518559	N.A	Urszula Domańska, and Marta Królikowska. Measurements of activity coefficients at infinite dilution of aliphatic and aromatic hydrocarbons, alcohols, thiophene, tetrahydrofuran, MTBE, and water in ionic liquid [BMIM][SCN] using GLC. J. Chem. Thermodynamics, 2009, 41 (5): 645-650
[C4MIm][SCN]	308.15	0.709	0.93	1.32	12.385	N.A	N.A	N.A	54.8	73.7	102	N.A	0.5224	0.6938	0.9432	12	N.A	N.A	N.A	20.34	33.14	53.14	N.A	-0.263188	-0.253978	-0.285455	-0.031086	N.A	N.A	N.A	-0.628832	-0.550339	-0.47902	N.A	Urszula Domańska, and Marta Królikowska. Measurements of activity coefficients at infinite dilution of aliphatic and aromatic hydrocarbons, alcohols, thiophene, tetrahydrofuran, MTBE, and water in ionic liquid [BMIM][SCN] using GLC. J. Chem. Thermodynamics, 2009, 41 (5): 645-650
[C4MIm][SCN]	318.15	0.69	0.9	1.25	11.926	N.A	N.A	N.A	50.2	68.5	96.3	N.A	0.5475	0.7291	0.9933	12.11	N.A	N.A	N.A	20.23	32.97	52.86	N.A	-0.206522	-0.189889	-0.20536	0.0154285	N.A	N.A	N.A	-0.597012	-0.518686	-0.45109	N.A	Urszula Domańska, and Marta Królikowska. Measurements of activity coefficients at infinite dilution of aliphatic and aromatic hydrocarbons, alcohols, thiophene, tetrahydrofuran, MTBE, and water in ionic liquid [BMIM][SCN] using GLC. J. Chem. Thermodynamics, 2009, 41 (5): 645-650
[C4MIm][SCN]	328.15	0.671	0.87	1.21	11.391	N.A	N.A	N.A	44.9	62.3	88.1	N.A	0.5718	0.7634	1.042	12.21	N.A	N.A	N.A	20.13	32.8	52.59	N.A	-0.147839	-0.122529	-0.138843	0.0718989	N.A	N.A	N.A	-0.55167	-0.473515	-0.403065	N.A	Urszula Domańska, and Marta Królikowska. Measurements of activity coefficients at infinite dilution of aliphatic and aromatic hydrocarbons, alcohols, thiophene, tetrahydrofuran, MTBE, and water in ionic liquid [BMIM][SCN] using GLC. J. Chem. Thermodynamics, 2009, 41 (5): 645-650
[C4MIm][SCN]	338.15	0.655	0.84	1.16	11.095	N.A	N.A	N.A	41.4	58	82.5	N.A	0.5953	0.7969	1.09	12.3	N.A	N.A	N.A	20.04	32.64	52.32	N.A	-0.091145	-0.0513095	-0.0603448	0.108607	N.A	N.A	N.A	-0.515942	-0.437241	-0.365818	N.A	Urszula Domańska, and Marta Królikowska. Measurements of activity coefficients at infinite dilution of aliphatic and aromatic hydrocarbons, alcohols, thiophene, tetrahydrofuran, MTBE, and water in ionic liquid [BMIM][SCN] using GLC. J. Chem. Thermodynamics, 2009, 41 (5): 645-650
[C4MIm][SCN]	348.15	0.643	0.83	1.13	10.748	N.A	N.A	N.A	38.3	54.8	77.6	N.A	0.6181	0.8295	1.138	12.39	N.A	N.A	N.A	19.94	32.48	52.05	N.A	-0.0387247	-0.00060241	0.00707965	0.152773	N.A	N.A	N.A	-0.479373	-0.407299	-0.329253	N.A	Urszula Domańska, and Marta Królikowska. Measurements of activity coefficients at infinite dilution of aliphatic and aromatic hydrocarbons, alcohols, thiophene, tetrahydrofuran, MTBE, and water in ionic liquid [BMIM][SCN] using GLC. J. Chem. Thermodynamics, 2009, 41 (5): 645-650
[C4MIm][SCN]	358.15	0.631	0.81	1.1	10.593	N.A	N.A	N.A	36.4	52.4	73.8	N.A	0.6401	0.8612	1.184	12.47	N.A	N.A	N.A	19.85	32.32	51.8	N.A	0.0144216	0.0632099	0.0763636	0.177192	N.A	N.A	N.A	-0.45467	-0.383206	-0.298103	N.A	Urszula Domańska, and Marta Królikowska. Measurements of activity coefficients at infinite dilution of aliphatic and aromatic hydrocarbons, alcohols, thiophene, tetrahydrofuran, MTBE, and water in ionic liquid [BMIM][SCN] using GLC. J. Chem. Thermodynamics, 2009, 41 (5): 645-650
[C4MIm][SCN]	368.15	0.623	0.8	1.08	N.A	N.A	N.A	N.A	N.A	N.A	N.A	N.A	0.6615	0.8922	1.229	N.A	N.A	N.A	N.A	N.A	N.A	N.A	N.A	0.0617978	0.11525	0.137963	N.A	N.A	N.A	N.A	N.A	N.A	N.A	N.A	Urszula Domańska, and Marta Królikowska. Measurements of activity coefficients at infinite dilution of aliphatic and aromatic hydrocarbons, alcohols, thiophene, tetrahydrofuran, MTBE, and water in ionic liquid [BMIM][SCN] using GLC. J. Chem. Thermodynamics, 2009, 41 (5): 645-650
[C4MPyr][N(CN)2]	318.15	0.55	0.688	N.A	6.04	N.A	N.A	N.A	N.A	N.A	N.A	0.67	0.4551	0.6652	N.A	6.32	N.A	N.A	N.A	N.A	N.A	N.A	0.6658	-0.172545	-0.0331395	N.A	0.0463576	N.A	N.A	N.A	N.A	N.A	N.A	-0.00626866	Aleš Blahut, and Vladimír Dohnal.Interactions of Volatile Organic Compounds with the Ionic Liquid 1-Butyl-1-methylpyrrolidinium Dicyanamide. J. Chem. Eng. Data, 2011, 56: 4909–4918
[C4MPyr][N(CN)2]	323.15	0.545	0.68	N.A	6.13	N.A	N.A	N.A	N.A	N.A	N.A	0.676	0.47	0.6862	N.A	6.36	N.A	N.A	N.A	N.A	N.A	N.A	0.6763	-0.137615	0.00911765	N.A	0.0375204	N.A	N.A	N.A	N.A	N.A	N.A	0.000443787	Aleš Blahut, and Vladimír Dohnal.Interactions of Volatile Organic Compounds with the Ionic Liquid 1-Butyl-1-methylpyrrolidinium Dicyanamide. J. Chem. Eng. Data, 2011, 56: 4909–4918
[C4MPyr][N(CN)2]	333.15	0.538	0.668	N.A	6.29	N.A	N.A	N.A	N.A	N.A	N.A	0.68	0.4992	0.7276	N.A	6.428	N.A	N.A	N.A	N.A	N.A	N.A	0.6963	-0.072119	0.0892216	N.A	0.0219396	N.A	N.A	N.A	N.A	N.A	N.A	0.0239706	Aleš Blahut, and Vladimír Dohnal.Interactions of Volatile Organic Compounds with the Ionic Liquid 1-Butyl-1-methylpyrrolidinium Dicyanamide. J. Chem. Eng. Data, 2011, 56: 4909–4918
[C4MPyr][N(CN)2]	343.15	0.53	0.656	N.A	6.4	N.A	N.A	N.A	N.A	N.A	N.A	0.684	0.5278	0.768	N.A	6.485	N.A	N.A	N.A	N.A	N.A	N.A	0.715	-0.00415094	0.170732	N.A	0.0132812	N.A	N.A	N.A	N.A	N.A	N.A	0.0453216	Aleš Blahut, and Vladimír Dohnal.Interactions of Volatile Organic Compounds with the Ionic Liquid 1-Butyl-1-methylpyrrolidinium Dicyanamide. J. Chem. Eng. Data, 2011, 56: 4909–4918
[C4MPyr][N(CN)2]	353.15	0.525	0.647	N.A	6.53	N.A	N.A	N.A	N.A	N.A	N.A	0.687	0.5557	0.8073	N.A	6.53	N.A	N.A	N.A	N.A	N.A	N.A	0.7323	0.0584762	0.247759	N.A	0	N.A	N.A	N.A	N.A	N.A	N.A	0.0659389	Aleš Blahut, and Vladimír Dohnal.Interactions of Volatile Organic Compounds with the Ionic Liquid 1-Butyl-1-methylpyrrolidinium Dicyanamide. J. Chem. Eng. Data, 2011, 56: 4909–4918
[C6MPy][TOS]	338.15	0.291	0.329	N.A	4.84	N.A	N.A	4	8.44	10.5	13.5	N.A	0.2515	0.3288	N.A	4.73	N.A	N.A	3.019	6.59	10.49	16.42	N.A	-0.135739	-0.000607903	N.A	-0.0227273	N.A	N.A	-0.24525	-0.219194	-0.000952381	0.216296	N.A	Urszula Domańska, and Marek Królikowski. Thermodynamics and Activity Coefficients at Infinite Dilution Measurements for Organic Solutes and Water in the Ionic Liquid N-Hexyl-3-methylpyridinium Tosylate. J. Phys. Chem. B, 2011, 115: 7397–7404
[C6MPy][TOS]	348.15	0.292	0.33	N.A	4.57	N.A	N.A	3.83	7.89	10	12.8	N.A	0.2643	0.3449	N.A	4.576	N.A	N.A	2.94	6.441	10.2	15.89	N.A	-0.094863	0.0451515	N.A	0.00131291	N.A	N.A	-0.232376	-0.18365	0.02	0.241406	N.A	Urszula Domańska, and Marek Królikowski. Thermodynamics and Activity Coefficients at Infinite Dilution Measurements for Organic Solutes and Water in the Ionic Liquid N-Hexyl-3-methylpyridinium Tosylate. J. Phys. Chem. B, 2011, 115: 7397–7404
[C6MPy][TOS]	358.15	0.294	0.333	N.A	4.34	N.A	N.A	3.67	7.42	9.54	12.3	N.A	0.2766	0.3602	N.A	4.433	N.A	N.A	2.866	6.297	9.925	15.39	N.A	-0.0591837	0.0816817	N.A	0.0214286	N.A	N.A	-0.219074	-0.151348	0.0403564	0.25122	N.A	Urszula Domańska, and Marek Królikowski. Thermodynamics and Activity Coefficients at Infinite Dilution Measurements for Organic Solutes and Water in the Ionic Liquid N-Hexyl-3-methylpyridinium Tosylate. J. Phys. Chem. B, 2011, 115: 7397–7404
[C6MPy][TOS]	368.15	0.295	0.335	N.A	4.09	N.A	N.A	3.51	6.99	9.09	11.6	N.A	0.2884	0.3748	N.A	4.3	N.A	N.A	2.796	6.159	9.663	14.92	N.A	-0.0223729	0.118806	N.A	0.0513447	N.A	N.A	-0.203419	-0.118884	0.0630363	0.286207	N.A	Urszula Domańska, and Marek Królikowski. Thermodynamics and Activity Coefficients at Infinite Dilution Measurements for Organic Solutes and Water in the Ionic Liquid N-Hexyl-3-methylpyridinium Tosylate. J. Phys. Chem. B, 2011, 115: 7397–7404
[C4MIm][CF3SO3]	298.15	1.07	N.A	N.A	4.21	N.A	N.A	N.A	17.6	24.7	35.5	N.A	0.849	N.A	N.A	3.883	N.A	N.A	N.A	11.65	19.76	32.99	N.A	-0.206542	N.A	N.A	-0.0776722	N.A	N.A	N.A	-0.338068	-0.2	-0.0707042	N.A	Urszula Domańska, and Andrzej Marciniak. Activity Coefficients at Infinite Dilution Measurements for Organic Solutes and Water in the Ionic Liquid 1-Butyl-3-methylimidazolium Trifluoromethanesulfonate. J. Phys. Chem. B, 2008, 112: 11100–11105
[C4MIm][CF3SO3]	308.15	1.01	1.27	1.66	4.19	N.A	N.A	N.A	16.7	23.5	33.5	N.A	0.8554	1.176	1.656	3.969	N.A	N.A	N.A	11.5	19.41	32.22	N.A	-0.153069	-0.0740157	-0.00240964	-0.0527446	N.A	N.A	N.A	-0.311377	-0.174043	-0.038209	N.A	Urszula Domańska, and Andrzej Marciniak. Activity Coefficients at Infinite Dilution Measurements for Organic Solutes and Water in the Ionic Liquid 1-Butyl-3-methylimidazolium Trifluoromethanesulfonate. J. Phys. Chem. B, 2008, 112: 11100–11105
[C4MIm][CF3SO3]	318.15	0.958	1.2	1.57	4.17	N.A	N.A	N.A	15.9	22.4	31.9	N.A	0.8612	1.181	1.658	4.043	N.A	N.A	N.A	11.35	19.04	31.45	N.A	-0.101044	-0.0158333	0.056051	-0.0304556	N.A	N.A	N.A	-0.286164	-0.15	-0.0141066	N.A	Urszula Domańska, and Andrzej Marciniak. Activity Coefficients at Infinite Dilution Measurements for Organic Solutes and Water in the Ionic Liquid 1-Butyl-3-methylimidazolium Trifluoromethanesulfonate. J. Phys. Chem. B, 2008, 112: 11100–11105
[C4MIm][CF3SO3]	328.15	0.911	1.14	1.49	4.15	N.A	N.A	N.A	15.2	21.4	30.2	N.A	0.8664	1.186	1.659	4.106	N.A	N.A	N.A	11.19	18.68	30.7	N.A	-0.0489572	0.0403509	0.113423	-0.0106024	N.A	N.A	N.A	-0.263816	-0.127103	0.0165563	N.A	Urszula Domańska, and Andrzej Marciniak. Activity Coefficients at Infinite Dilution Measurements for Organic Solutes and Water in the Ionic Liquid 1-Butyl-3-methylimidazolium Trifluoromethanesulfonate. J. Phys. Chem. B, 2008, 112: 11100–11105
[C4MIm][CF3SO3]	338.15	0.871	1.09	1.42	4.14	N.A	N.A	N.A	14.5	20.5	28.9	N.A	0.8712	1.189	1.66	4.16	N.A	N.A	N.A	11.03	18.32	29.95	N.A	0.000229621	0.0908257	0.169014	0.00483092	N.A	N.A	N.A	-0.23931	-0.106341	0.0363322	N.A	Urszula Domańska, and Andrzej Marciniak. Activity Coefficients at Infinite Dilution Measurements for Organic Solutes and Water in the Ionic Liquid 1-Butyl-3-methylimidazolium Trifluoromethanesulfonate. J. Phys. Chem. B, 2008, 112: 11100–11105
[C4MIm][CF3SO3]	348.15	0.832	1.04	1.35	4.12	N.A	N.A	N.A	14	19.7	27.6	N.A	0.8756	1.193	1.66	4.204	N.A	N.A	N.A	10.86	17.96	29.22	N.A	0.0524038	0.147115	0.22963	0.0203883	N.A	N.A	N.A	-0.224286	-0.0883249	0.0586957	N.A	Urszula Domańska, and Andrzej Marciniak. Activity Coefficients at Infinite Dilution Measurements for Organic Solutes and Water in the Ionic Liquid 1-Butyl-3-methylimidazolium Trifluoromethanesulfonate. J. Phys. Chem. B, 2008, 112: 11100–11105
[C4MIm][CF3SO3]	358.15	0.798	1	1.29	4.1	N.A	N.A	N.A	13.4	19	26.5	N.A	0.8797	1.196	1.66	4.241	N.A	N.A	N.A	10.7	17.61	28.5	N.A	0.102381	0.196	0.286822	0.0343902	N.A	N.A	N.A	-0.201493	-0.0731579	0.0754717	N.A	Urszula Domańska, and Andrzej Marciniak. Activity Coefficients at Infinite Dilution Measurements for Organic Solutes and Water in the Ionic Liquid 1-Butyl-3-methylimidazolium Trifluoromethanesulfonate. J. Phys. Chem. B, 2008, 112: 11100–11105
[C4MIm][CF3SO3]	368.15	0.768	0.959	1.23	N.A	N.A	N.A	N.A	12.9	18.3	25.6	N.A	0.8834	1.198	1.66	N.A	N.A	N.A	N.A	10.54	17.26	27.81	N.A	0.15026	0.249218	0.349593	N.A	N.A	N.A	N.A	-0.182946	-0.0568306	0.0863281	N.A	Urszula Domańska, and Andrzej Marciniak. Activity Coefficients at Infinite Dilution Measurements for Organic Solutes and Water in the Ionic Liquid 1-Butyl-3-methylimidazolium Trifluoromethanesulfonate. J. Phys. Chem. B, 2008, 112: 11100–11105
[C4MIm][NO3]	303.15	0.56	0.77	N.A	N.A	N.A	N.A	N.A	N.A	N.A	N.A	0.6	0.4869	0.6485	N.A	N.A	N.A	N.A	N.A	N.A	N.A	N.A	0.6011	-0.130536	-0.157792	N.A	N.A	N.A	N.A	N.A	N.A	N.A	N.A	0.00183333	Yun-Xia Feng, Li-Sheng Wang, and Yi Li. Activity Coefficients at Infinite Dilution of Organic Solutes in 1-Butyl-3-methylimidazolium Nitrate Using Gas Liquid Chromatography. J. Chem. Eng. Data, 2011, 56: 2730–2736
[C4MIm][NO3]	313.15	0.54	0.73	N.A	N.A	N.A	N.A	N.A	N.A	N.A	N.A	0.61	0.5091	0.6795	N.A	N.A	N.A	N.A	N.A	N.A	N.A	N.A	0.6103	-0.0572222	-0.0691781	N.A	N.A	N.A	N.A	N.A	N.A	N.A	N.A	0.000491803	Yun-Xia Feng, Li-Sheng Wang, and Yi Li. Activity Coefficients at Infinite Dilution of Organic Solutes in 1-Butyl-3-methylimidazolium Nitrate Using Gas Liquid Chromatography. J. Chem. Eng. Data, 2011, 56: 2730–2736
[C4MIm][NO3]	323.15	0.53	0.71	N.A	N.A	N.A	N.A	N.A	N.A	N.A	N.A	0.62	0.5301	0.7091	N.A	N.A	N.A	N.A	N.A	N.A	N.A	N.A	0.6181	0.000188679	-0.00126761	N.A	N.A	N.A	N.A	N.A	N.A	N.A	N.A	-0.00306452	Yun-Xia Feng, Li-Sheng Wang, and Yi Li. Activity Coefficients at Infinite Dilution of Organic Solutes in 1-Butyl-3-methylimidazolium Nitrate Using Gas Liquid Chromatography. J. Chem. Eng. Data, 2011, 56: 2730–2736
[C4MIm][NO3]	333.15	0.52	0.69	N.A	N.A	N.A	N.A	N.A	N.A	N.A	N.A	0.62	0.5502	0.7376	N.A	N.A	N.A	N.A	N.A	N.A	N.A	N.A	0.6246	0.0580769	0.0689855	N.A	N.A	N.A	N.A	N.A	N.A	N.A	N.A	0.00741935	Yun-Xia Feng, Li-Sheng Wang, and Yi Li. Activity Coefficients at Infinite Dilution of Organic Solutes in 1-Butyl-3-methylimidazolium Nitrate Using Gas Liquid Chromatography. J. Chem. Eng. Data, 2011, 56: 2730–2736
[C4MIm][NO3]	343.15	0.51	0.67	N.A	N.A	N.A	N.A	N.A	N.A	N.A	N.A	0.63	0.5694	0.7648	N.A	N.A	N.A	N.A	N.A	N.A	N.A	N.A	0.6299	0.116471	0.141493	N.A	N.A	N.A	N.A	N.A	N.A	N.A	N.A	-0.00015873	Yun-Xia Feng, Li-Sheng Wang, and Yi Li. Activity Coefficients at Infinite Dilution of Organic Solutes in 1-Butyl-3-methylimidazolium Nitrate Using Gas Liquid Chromatography. J. Chem. Eng. Data, 2011, 56: 2730–2736
[C4MIm][NO3]	353.15	0.51	0.66	N.A	N.A	N.A	N.A	N.A	N.A	N.A	N.A	0.63	0.5877	0.791	N.A	N.A	N.A	N.A	N.A	N.A	N.A	N.A	0.6342	0.152353	0.198485	N.A	N.A	N.A	N.A	N.A	N.A	N.A	N.A	0.00666667	Yun-Xia Feng, Li-Sheng Wang, and Yi Li. Activity Coefficients at Infinite Dilution of Organic Solutes in 1-Butyl-3-methylimidazolium Nitrate Using Gas Liquid Chromatography. J. Chem. Eng. Data, 2011, 56: 2730–2736
[C4MIm][NO3]	363.15	0.51	0.65	N.A	N.A	N.A	N.A	N.A	N.A	N.A	N.A	0.64	0.6051	0.8161	N.A	N.A	N.A	N.A	N.A	N.A	N.A	N.A	0.6376	0.186471	0.255538	N.A	N.A	N.A	N.A	N.A	N.A	N.A	N.A	-0.00375	Yun-Xia Feng, Li-Sheng Wang, and Yi Li. Activity Coefficients at Infinite Dilution of Organic Solutes in 1-Butyl-3-methylimidazolium Nitrate Using Gas Liquid Chromatography. J. Chem. Eng. Data, 2011, 56: 2730–2736
[C4MPyr][BF4]	298	1.96993	2.79995	4.15994	7.64002	N.A	12.3099	N.A	N.A	N.A	N.A	0.589017	1.807	2.563	3.721	7.619	N.A	12.71	N.A	N.A	N.A	N.A	0.5117	-0.0827103	-0.0846251	-0.105515	-0.00275108	N.A	0.0325062	N.A	N.A	N.A	N.A	-0.131265	David M. Eike, Joan F. Brennecke, and Edward J. Maginn. Predicting Infinite-Dilution Activity Coefficients of Organic Solutes in Ionic Liquids. Ind. Eng. Chem. Res, 2004, 43: 1039-1048
[C4MPy][CF3SO3]	308.15	N.A	N.A	N.A	4.21	N.A	N.A	4.29	11.9	17.1	24.3	N.A	N.A	N.A	N.A	4.469	N.A	N.A	3.332	11.74	20.17	34.12	N.A	N.A	N.A	N.A	0.0615202	N.A	N.A	-0.22331	-0.0134454	0.179532	0.404115	N.A	Andrzej Marciniak, Michał Wlazło. Activity Coefficients at Infinite Dilution Measurements for Organic Solutes and Water in the Ionic Liquid 1-Butyl-3-methyl-pyridinium Trifluoromethanesulfonate. J. Chem. Eng. Data, 2010, 55: 3208–3211
[C4MPy][CF3SO3]	318.15	0.907	1.11	1.42	4.22	N.A	N.A	4.24	11.5	16.4	23.2	N.A	0.6947	0.97	1.386	4.43	N.A	N.A	3.299	11.5	19.65	33.04	N.A	-0.234068	-0.126126	-0.0239437	0.049763	N.A	N.A	-0.221934	0	0.198171	0.424138	N.A	Andrzej Marciniak, Michał Wlazło. Activity Coefficients at Infinite Dilution Measurements for Organic Solutes and Water in the Ionic Liquid 1-Butyl-3-methyl-pyridinium Trifluoromethanesulfonate. J. Chem. Eng. Data, 2010, 55: 3208–3211
[C4MPy][CF3SO3]	328.15	0.867	1.06	1.34	4.23	N.A	N.A	4.18	11.2	15.9	22.3	N.A	0.7077	0.985	1.402	4.387	N.A	N.A	3.264	11.27	19.14	31.99	N.A	-0.183737	-0.0707547	0.0462687	0.0371158	N.A	N.A	-0.219139	0.00625	0.203774	0.434529	N.A	Andrzej Marciniak, Michał Wlazło. Activity Coefficients at Infinite Dilution Measurements for Organic Solutes and Water in the Ionic Liquid 1-Butyl-3-methyl-pyridinium Trifluoromethanesulfonate. J. Chem. Eng. Data, 2010, 55: 3208–3211
[C4MPy][CF3SO3]	338.15	0.827	1	1.26	4.23	N.A	N.A	4.14	10.9	15.4	21.5	N.A	0.7195	0.9983	1.416	4.34	N.A	N.A	3.228	11.04	18.64	30.98	N.A	-0.129988	-0.0017	0.12381	0.0260047	N.A	N.A	-0.22029	0.012844	0.21039	0.44093	N.A	Andrzej Marciniak, Michał Wlazło. Activity Coefficients at Infinite Dilution Measurements for Organic Solutes and Water in the Ionic Liquid 1-Butyl-3-methyl-pyridinium Trifluoromethanesulfonate. J. Chem. Eng. Data, 2010, 55: 3208–3211
[C4MPy][CF3SO3]	348.15	0.79	0.958	1.2	4.24	N.A	N.A	4.1	10.6	15	20.8	N.A	0.7303	1.01	1.428	4.291	N.A	N.A	3.191	10.81	18.16	30	N.A	-0.0755696	0.0542797	0.19	0.0120283	N.A	N.A	-0.221707	0.0198113	0.210667	0.442308	N.A	Andrzej Marciniak, Michał Wlazło. Activity Coefficients at Infinite Dilution Measurements for Organic Solutes and Water in the Ionic Liquid 1-Butyl-3-methyl-pyridinium Trifluoromethanesulfonate. J. Chem. Eng. Data, 2010, 55: 3208–3211
[C4MPy][CF3SO3]	358.15	0.759	0.919	1.15	4.24	N.A	N.A	4.07	10.3	14.5	20	N.A	0.74	1.021	1.439	4.241	N.A	N.A	3.153	10.59	17.69	29.07	N.A	-0.0250329	0.11099	0.251304	0.000235849	N.A	N.A	-0.225307	0.0281553	0.22	0.4535	N.A	Andrzej Marciniak, Michał Wlazło. Activity Coefficients at Infinite Dilution Measurements for Organic Solutes and Water in the Ionic Liquid 1-Butyl-3-methyl-pyridinium Trifluoromethanesulfonate. J. Chem. Eng. Data, 2010, 55: 3208–3211
[C8MIm][PF6]	313.15	2.27	N.A	N.A	N.A	N.A	N.A	N.A	6.31	6.22	6.11	N.A	1.635	N.A	N.A	N.A	N.A	N.A	N.A	N.A	N.A	N.A	N.A	-0.279736	N.A	N.A	N.A	N.A	N.A	N.A	N.A	N.A	N.A	N.A	Eugene Olivier, Trevor M. Letcher, Paramespri Naidoo, and Deresh Ramjugernath. Activity coefficients at infinite dilution of organic solutes in the ionic liquid 1-octyl-3-methylimidazolium hexafluorophosphate using gas–liquid chromatography at T = (313.15, 323.15, and 333.15) K. J. Chem. Thermodynamics, 2010,42: 646–650
[C8MIm][PF6]	323.15	2.03	N.A	N.A	N.A	N.A	N.A	N.A	8.2	8.2	8.1	N.A	1.596	N.A	N.A	N.A	N.A	N.A	N.A	N.A	N.A	N.A	N.A	-0.213793	N.A	N.A	N.A	N.A	N.A	N.A	N.A	N.A	N.A	N.A	Eugene Olivier, Trevor M. Letcher, Paramespri Naidoo, and Deresh Ramjugernath. Activity coefficients at infinite dilution of organic solutes in the ionic liquid 1-octyl-3-methylimidazolium hexafluorophosphate using gas–liquid chromatography at T = (313.15, 323.15, and 333.15) K. J. Chem. Thermodynamics, 2010,42: 646–650
[C8MIm][PF6]	333.15	1.81	N.A	N.A	N.A	N.A	N.A	N.A	10.5	10.5	10.4	N.A	1.558	N.A	N.A	N.A	N.A	N.A	N.A	N.A	N.A	N.A	N.A	-0.139227	N.A	N.A	N.A	N.A	N.A	N.A	N.A	N.A	N.A	N.A	Eugene Olivier, Trevor M. Letcher, Paramespri Naidoo, and Deresh Ramjugernath. Activity coefficients at infinite dilution of organic solutes in the ionic liquid 1-octyl-3-methylimidazolium hexafluorophosphate using gas–liquid chromatography at T = (313.15, 323.15, and 333.15) K. J. Chem. Thermodynamics, 2010,42: 646–650
[C8MIm][Cl]	298.15	N.A	N.A	N.A	N.A	N.A	N.A	N.A	11.1	13.8	17.2	N.A	N.A	N.A	N.A	N.A	N.A	N.A	N.A	5.095	6.597	8.41	N.A	N.A	N.A	N.A	N.A	N.A	N.A	N.A	-0.540991	-0.521957	-0.511047	N.A	Warren David, Trevor M. Letcher b,, Deresh Ramjugernath J. David Raa. Activity coefficients of hydrocarbon solutes at infinite dilution in the ionic liquid, 1-methyl-3-octyl-imidazolium chloride from gas–liquid chromatography. J. Chem. Thermodynamics, 2003, 35 (8): 1335-1341
[C8MIm][Cl]	308.15	N.A	N.A	N.A	N.A	N.A	N.A	N.A	10.5	12.8	16.3	N.A	N.A	N.A	N.A	N.A	N.A	N.A	N.A	5.045	6.541	8.348	N.A	N.A	N.A	N.A	N.A	N.A	N.A	N.A	-0.519524	-0.488984	-0.487853	N.A	Warren David, Trevor M. Letcher b,, Deresh Ramjugernath J. David Raa. Activity coefficients of hydrocarbon solutes at infinite dilution in the ionic liquid, 1-methyl-3-octyl-imidazolium chloride from gas–liquid chromatography. J. Chem. Thermodynamics, 2003, 35 (8): 1335-1341
[C8MIm][Cl]	318.15	N.A	N.A	N.A	N.A	N.A	N.A	N.A	9.78	12.5	15.3	N.A	N.A	N.A	N.A	N.A	N.A	N.A	N.A	4.999	6.488	8.288	N.A	N.A	N.A	N.A	N.A	N.A	N.A	N.A	-0.488855	-0.48096	-0.458301	N.A	Warren David, Trevor M. Letcher b,, Deresh Ramjugernath J. David Raa. Activity coefficients of hydrocarbon solutes at infinite dilution in the ionic liquid, 1-methyl-3-octyl-imidazolium chloride from gas–liquid chromatography. J. Chem. Thermodynamics, 2003, 35 (8): 1335-1341
[CH2=CHC1MIm][BF4]	298	N.A	N.A	N.A	N.A	N.A	N.A	N.A	47.74	N.A	N.A	N.A	N.A	N.A	N.A	N.A	N.A	N.A	N.A	51.25	N.A	N.A	N.A	N.A	N.A	N.A	N.A	N.A	N.A	N.A	0.0735233	N.A	N.A	N.A	Zhu Jiqin, YU Yanmei, CHEN Jian , FEI Weiyang. Measurement of activity coefficients at infinite dilution for hydrocarbons in imidazolium-based ionic liquids and QSPR model. Front. Chem. Eng. China, 2007, 1 (2): 190–194
[CH2=CHC1MIm][BF4]	308	N.A	N.A	N.A	N.A	N.A	N.A	N.A	41.56	N.A	N.A	N.A	N.A	N.A	N.A	N.A	N.A	N.A	N.A	50.76	N.A	N.A	N.A	N.A	N.A	N.A	N.A	N.A	N.A	N.A	0.221367	N.A	N.A	N.A	Zhu Jiqin, YU Yanmei, CHEN Jian , FEI Weiyang. Measurement of activity coefficients at infinite dilution for hydrocarbons in imidazolium-based ionic liquids and QSPR model. Front. Chem. Eng. China, 2007, 1 (2): 190–194
[CH2=CHC1MIm][BF4]	318	N.A	N.A	N.A	N.A	N.A	N.A	N.A	38.17	N.A	N.A	N.A	N.A	N.A	N.A	N.A	N.A	N.A	N.A	50.27	N.A	N.A	N.A	N.A	N.A	N.A	N.A	N.A	N.A	N.A	0.317003	N.A	N.A	N.A	Zhu Jiqin, YU Yanmei, CHEN Jian , FEI Weiyang. Measurement of activity coefficients at infinite dilution for hydrocarbons in imidazolium-based ionic liquids and QSPR model. Front. Chem. Eng. China, 2007, 1 (2): 190–194
[C2MIm]CH3SO3]	312.55	0.438	0.742	N.A	N.A	N.A	N.A	21.818	86.953	N.A	N.A	1.263	0.3819	0.6579	N.A	N.A	N.A	N.A	15.93	64.08	N.A	N.A	0.818	-0.128082	-0.113342	N.A	N.A	N.A	N.A	-0.269869	-0.26305	N.A	N.A	-0.352336	Jean-Charles Moïse, Fabrice Mutelet, Jean-No€el Jaubert, Laura M. Grubbs, William E. Acree, Jr., and Gary A. Baker. Activity Coefficients at Infinite Dilution of Organic Compounds in Four New Imidazolium-Based Ionic Liquids. J. Chem. Eng. Data, 2011, 56: 3106–3114
[C2MIm]CH3SO3]	322.45	0.418	0.734	N.A	N.A	N.A	N.A	20.373	83.446	N.A	N.A	0.818	0.418	0.7199	N.A	N.A	N.A	N.A	16	63.24	N.A	N.A	0.8347	0	-0.0192098	N.A	N.A	N.A	N.A	-0.214647	-0.242145	N.A	N.A	0.0204156	Jean-Charles Moïse, Fabrice Mutelet, Jean-No€el Jaubert, Laura M. Grubbs, William E. Acree, Jr., and Gary A. Baker. Activity Coefficients at Infinite Dilution of Organic Compounds in Four New Imidazolium-Based Ionic Liquids. J. Chem. Eng. Data, 2011, 56: 3106–3114
[C2MIm]CH3SO3]	332.45	0.405	0.722	N.A	N.A	N.A	N.A	18.006	68.875	N.A	N.A	0.836	0.4554	0.7839	N.A	N.A	N.A	N.A	16.05	62.4	N.A	N.A	0.8509	0.124444	0.0857341	N.A	N.A	N.A	N.A	-0.10863	-0.0940109	N.A	N.A	0.017823	Jean-Charles Moïse, Fabrice Mutelet, Jean-No€el Jaubert, Laura M. Grubbs, William E. Acree, Jr., and Gary A. Baker. Activity Coefficients at Infinite Dilution of Organic Compounds in Four New Imidazolium-Based Ionic Liquids. J. Chem. Eng. Data, 2011, 56: 3106–3114
[C4MPip][NTf2]	308.15	1.86	2.22	N.A	2.04	N.A	N.A	2.14	6.96	9.58	13.5	N.A	1.385	1.805	N.A	2.041	N.A	N.A	1.666	5.523	8.832	13.9	N.A	-0.255376	-0.186937	N.A	0.000490196	N.A	N.A	-0.221495	-0.206466	-0.0780793	0.0296296	N.A	Kamil Paduszyński and Urszula Domańska. Limiting Activity Coefficients and Gas-Liquid Partition Coefficients of Various Solutes in Piperidinium Ionic Liquids. J. Phys. Chem. B, 2011, 115: 8207–8215
[C4MPip][NTf2]	318.15	1.71	2.03	2.47	2.04	N.A	N.A	2.14	6.29	8.74	12.1	N.A	1.345	1.746	2.32	2.071	N.A	N.A	1.677	5.346	8.494	13.28	N.A	-0.21345	-0.139901	-0.0607287	0.0151961	N.A	N.A	-0.216355	-0.150079	-0.0281465	0.0975207	N.A	Kamil Paduszyński and Urszula Domańska. Limiting Activity Coefficients and Gas-Liquid Partition Coefficients of Various Solutes in Piperidinium Ionic Liquids. J. Phys. Chem. B, 2011, 115: 8207–8215
[C4MPip][NTf2]	328.15	1.57	1.85	2.25	2.05	N.A	N.A	2.01	5.89	8.05	11.2	N.A	1.307	1.692	2.239	2.097	N.A	N.A	1.686	5.18	8.179	12.71	N.A	-0.167516	-0.0854054	-0.00488889	0.0229268	N.A	N.A	-0.161194	-0.120543	0.0160248	0.134821	N.A	Kamil Paduszyński and Urszula Domańska. Limiting Activity Coefficients and Gas-Liquid Partition Coefficients of Various Solutes in Piperidinium Ionic Liquids. J. Phys. Chem. B, 2011, 115: 8207–8215
[C4MPip][NTf2]	338.15	1.43	1.69	2.03	2.04	N.A	N.A	2.04	5.64	7.76	10.7	N.A	1.273	1.641	2.164	2.119	N.A	N.A	1.692	5.024	7.884	12.18	N.A	-0.10979	-0.0289941	0.0660099	0.0387255	N.A	N.A	-0.170588	-0.10922	0.0159794	0.138318	N.A	Kamil Paduszyński and Urszula Domańska. Limiting Activity Coefficients and Gas-Liquid Partition Coefficients of Various Solutes in Piperidinium Ionic Liquids. J. Phys. Chem. B, 2011, 115: 8207–8215
[C4MPip][NTf2]	348.15	1.31	1.55	1.85	2.03	N.A	N.A	2.01	5.35	7.39	10.1	N.A	1.241	1.595	2.095	2.138	N.A	N.A	1.697	4.878	7.609	11.68	N.A	-0.0526718	0.0290323	0.132432	0.053202	N.A	N.A	-0.155721	-0.0882243	0.0296346	0.156436	N.A	Kamil Paduszyński and Urszula Domańska. Limiting Activity Coefficients and Gas-Liquid Partition Coefficients of Various Solutes in Piperidinium Ionic Liquids. J. Phys. Chem. B, 2011, 115: 8207–8215
[C4MPip][NTf2]	358.15	1.11	1.44	1.72	2.07	N.A	N.A	2.04	5.24	7.26	9.76	N.A	1.211	1.551	2.031	2.153	N.A	N.A	1.699	4.74	7.352	11.22	N.A	0.090991	0.0770833	0.180814	0.0400966	N.A	N.A	-0.167157	-0.0954198	0.0126722	0.14959	N.A	Kamil Paduszyński and Urszula Domańska. Limiting Activity Coefficients and Gas-Liquid Partition Coefficients of Various Solutes in Piperidinium Ionic Liquids. J. Phys. Chem. B, 2011, 115: 8207–8215
[CH2=CHC1MIm][NTf2]	318.15	1.73	2.18	2.88	2.49	5.63	3.75	2.53	11.1	16.3	24.1	0.461	1.841	2.449	3.333	3.403	7.434	5.311	2.584	8.313	13.53	21.67	0.4331	0.0641618	0.123394	0.157292	0.366667	0.320426	0.416267	0.0213439	-0.251081	-0.169939	-0.10083	-0.0605206	Michał Wlazło, Monika Karpińska, Urszula Domańska. Thermodynamics and selectivity of separation based on activity coefficients at infinite dilution of various solutes in 1-allyl-3-methylimidazolium bis{(trifluoromethyl)sulfonyl}imide ionic liquid. J. Chem. Thermodynamics, 2016, 106: 39–47
[CH2=CHC1MIm][NTf2]	328.15	1.64	2.07	2.7	2.62	5.81	3.91	2.63	10.7	15.7	23	0.48	1.794	2.382	3.235	3.475	7.467	5.406	2.617	8.09	13.11	20.9	0.4376	0.0939024	0.150725	0.198148	0.326336	0.285198	0.382609	-0.00494297	-0.243925	-0.164968	-0.0913043	-0.0883333	Michał Wlazło, Monika Karpińska, Urszula Domańska. Thermodynamics and selectivity of separation based on activity coefficients at infinite dilution of various solutes in 1-allyl-3-methylimidazolium bis{(trifluoromethyl)sulfonyl}imide ionic liquid. J. Chem. Thermodynamics, 2016, 106: 39–47
[CH2=CHC1MIm][NTf2]	338.15	1.56	1.96	2.54	2.76	5.96	4.05	2.73	10.4	15.2	22.2	0.499	1.751	2.321	3.145	3.542	7.491	5.492	2.646	7.88	12.71	20.18	0.4417	0.122436	0.184184	0.238189	0.283333	0.256879	0.356049	-0.0307692	-0.242308	-0.163816	-0.090991	-0.11483	Michał Wlazło, Monika Karpińska, Urszula Domańska. Thermodynamics and selectivity of separation based on activity coefficients at infinite dilution of various solutes in 1-allyl-3-methylimidazolium bis{(trifluoromethyl)sulfonyl}imide ionic liquid. J. Chem. Thermodynamics, 2016, 106: 39–47
[CH2=CHC1MIm][NTf2]	348.15	1.49	1.87	2.4	2.89	6.11	4.18	2.83	10.1	14.7	21.2	0.52	1.711	2.264	3.063	3.603	7.505	5.568	2.672	7.681	12.34	19.5	0.4453	0.148322	0.210695	0.27625	0.246713	0.228314	0.332057	-0.0558304	-0.239505	-0.160544	-0.0801887	-0.143654	Michał Wlazło, Monika Karpińska, Urszula Domańska. Thermodynamics and selectivity of separation based on activity coefficients at infinite dilution of various solutes in 1-allyl-3-methylimidazolium bis{(trifluoromethyl)sulfonyl}imide ionic liquid. J. Chem. Thermodynamics, 2016, 106: 39–47
[CH2=CHC1MIm][NTf2]	358.15	1.42	1.79	2.28	3.02	6.26	4.33	2.93	9.87	14.2	20.5	0.538	1.674	2.212	2.987	3.659	7.512	5.637	2.695	7.492	11.98	18.86	0.4486	0.178873	0.235754	0.310088	0.211589	0.2	0.301848	-0.0802048	-0.240932	-0.156338	-0.08	-0.166171	Michał Wlazło, Monika Karpińska, Urszula Domańska. Thermodynamics and selectivity of separation based on activity coefficients at infinite dilution of various solutes in 1-allyl-3-methylimidazolium bis{(trifluoromethyl)sulfonyl}imide ionic liquid. J. Chem. Thermodynamics, 2016, 106: 39–47
[CH2=CHC1MIm][NTf2]	368.15	1.37	1.71	2.16	3.15	6.4	4.46	3.02	9.62	13.8	19.7	0.557	1.64	2.164	2.916	3.711	7.513	5.699	2.716	7.313	11.65	18.26	0.4515	0.19708	0.265497	0.35	0.178095	0.173906	0.277803	-0.100662	-0.239813	-0.155797	-0.0730964	-0.189408	Michał Wlazło, Monika Karpińska, Urszula Domańska. Thermodynamics and selectivity of separation based on activity coefficients at infinite dilution of various solutes in 1-allyl-3-methylimidazolium bis{(trifluoromethyl)sulfonyl}imide ionic liquid. J. Chem. Thermodynamics, 2016, 106: 39–47
[C4MPyr][CF3SO3]	298.15	1.05	N.A	N.A	5.67	N.A	N.A	N.A	21.6	29	40.9	N.A	0.7337	N.A	N.A	5.826	N.A	N.A	N.A	12.75	22.57	39.34	N.A	-0.301238	N.A	N.A	0.0275132	N.A	N.A	N.A	-0.409722	-0.221724	-0.0381418	N.A	Urszula Domańska, Gan G. Redhi, Andrzej Marciniak. Activity coefficients at infinite dilution measurements for organic solutes and water in the ionic liquid 1-butyl-1-methylpyrrolidinium trifluoromethanesulfonate using GLC. Fluid Phase Equilibria, 2009, 278 (1): 97-102
[C4MPyr][CF3SO3]	308.15	1	1.26	N.A	6.65	N.A	N.A	N.A	20.2	27.5	38.4	N.A	0.7433	1.065	N.A	5.792	N.A	N.A	N.A	12.41	21.81	37.73	N.A	-0.2567	-0.154762	N.A	-0.129023	N.A	N.A	N.A	-0.385644	-0.206909	-0.0174479	N.A	Urszula Domańska, Gan G. Redhi, Andrzej Marciniak. Activity coefficients at infinite dilution measurements for organic solutes and water in the ionic liquid 1-butyl-1-methylpyrrolidinium trifluoromethanesulfonate using GLC. Fluid Phase Equilibria, 2009, 278 (1): 97-102
[C4MPyr][CF3SO3]	318.15	0.948	1.2	N.A	5.64	N.A	N.A	N.A	19.2	26.1	36.2	N.A	0.7515	1.072	N.A	5.745	N.A	N.A	N.A	12.08	21.08	36.19	N.A	-0.207278	-0.106667	N.A	0.018617	N.A	N.A	N.A	-0.370833	-0.192337	-0.000276243	N.A	Urszula Domańska, Gan G. Redhi, Andrzej Marciniak. Activity coefficients at infinite dilution measurements for organic solutes and water in the ionic liquid 1-butyl-1-methylpyrrolidinium trifluoromethanesulfonate using GLC. Fluid Phase Equilibria, 2009, 278 (1): 97-102
[C4MPyr][CF3SO3]	328.15	0.9	1.14	1.49	5.63	N.A	N.A	N.A	18.1	24.8	34.3	N.A	0.7585	1.077	1.563	5.687	N.A	N.A	N.A	11.76	20.36	34.71	N.A	-0.157222	-0.0552632	0.0489933	0.0101243	N.A	N.A	N.A	-0.350276	-0.179032	0.0119534	N.A	Urszula Domańska, Gan G. Redhi, Andrzej Marciniak. Activity coefficients at infinite dilution measurements for organic solutes and water in the ionic liquid 1-butyl-1-methylpyrrolidinium trifluoromethanesulfonate using GLC. Fluid Phase Equilibria, 2009, 278 (1): 97-102
[C4MPyr][CF3SO3]	338.15	0.862	1.08	1.42	5.62	N.A	N.A	N.A	17.3	23.6	32.7	N.A	0.7645	1.081	1.561	5.62	N.A	N.A	N.A	11.44	19.67	33.3	N.A	-0.113109	0.000925926	0.0992958	0	N.A	N.A	N.A	-0.338728	-0.166525	0.0183486	N.A	Urszula Domańska, Gan G. Redhi, Andrzej Marciniak. Activity coefficients at infinite dilution measurements for organic solutes and water in the ionic liquid 1-butyl-1-methylpyrrolidinium trifluoromethanesulfonate using GLC. Fluid Phase Equilibria, 2009, 278 (1): 97-102
[C4MPyr][CF3SO3]	348.15	0.827	1.04	1.35	5.6	N.A	N.A	N.A	16.4	22.6	31.2	N.A	0.7696	1.083	1.558	5.547	N.A	N.A	N.A	11.13	19.01	31.95	N.A	-0.0694075	0.0413462	0.154074	-0.00946429	N.A	N.A	N.A	-0.321341	-0.15885	0.0240385	N.A	Urszula Domańska, Gan G. Redhi, Andrzej Marciniak. Activity coefficients at infinite dilution measurements for organic solutes and water in the ionic liquid 1-butyl-1-methylpyrrolidinium trifluoromethanesulfonate using GLC. Fluid Phase Equilibria, 2009, 278 (1): 97-102
[C4MPyr][CF3SO3]	358.15	0.791	0.995	1.29	5.59	N.A	N.A	N.A	15.7	21.6	29.8	N.A	0.7738	1.085	1.554	5.469	N.A	N.A	N.A	10.83	18.37	30.67	N.A	-0.0217446	0.0904523	0.204651	-0.0216458	N.A	N.A	N.A	-0.310191	-0.149537	0.0291946	N.A	Urszula Domańska, Gan G. Redhi, Andrzej Marciniak. Activity coefficients at infinite dilution measurements for organic solutes and water in the ionic liquid 1-butyl-1-methylpyrrolidinium trifluoromethanesulfonate using GLC. Fluid Phase Equilibria, 2009, 278 (1): 97-102
[C4MPyr][CF3SO3]	368.15	0.763	0.953	1.24	5.58	N.A	N.A	N.A	15	20.8	28.6	N.A	0.7774	1.086	1.548	5.387	N.A	N.A	N.A	10.53	17.75	29.44	N.A	0.0188729	0.139559	0.248387	-0.0345878	N.A	N.A	N.A	-0.298	-0.146635	0.0293706	N.A	Urszula Domańska, Gan G. Redhi, Andrzej Marciniak. Activity coefficients at infinite dilution measurements for organic solutes and water in the ionic liquid 1-butyl-1-methylpyrrolidinium trifluoromethanesulfonate using GLC. Fluid Phase Equilibria, 2009, 278 (1): 97-102
[CH3OC2MPyr][FAP]	318.15	2.63	3.28	4.14	1.33	3.03	1.96	1.38	5.47	7.75	11.1	0.292	1.745	2.46	3.548	1.084	3.366	1.794	1.063	4.781	8.247	14	0.2964	-0.336502	-0.25	-0.142995	-0.184962	0.110891	-0.0846939	-0.22971	-0.12596	0.064129	0.261261	0.0150685	Andrzej Marciniak, Michał Wlazło. Activity coefficients at infinite dilution and physicochemical properties for organic solutes and water in the ionic liquid 1-(2-methoxyethyl)-1-methylpyrrolidinium trifluorotris(perfluoroethyl)phosphate. J. Chem. Thermodynamics, 2013, 60 (3-4) :57-62
[CH3OC2MPyr][FAP]	328.15	2.4	2.96	3.71	1.39	3.08	2.02	1.42	5.39	7.6	10.8	0.306	1.731	2.43	3.489	1.132	3.411	1.862	1.092	4.818	8.253	13.91	0.3109	-0.27875	-0.179054	-0.0595687	-0.185612	0.107468	-0.0782178	-0.230986	-0.106122	0.0859211	0.287963	0.0160131	Andrzej Marciniak, Michał Wlazło. Activity coefficients at infinite dilution and physicochemical properties for organic solutes and water in the ionic liquid 1-(2-methoxyethyl)-1-methylpyrrolidinium trifluorotris(perfluoroethyl)phosphate. J. Chem. Thermodynamics, 2013, 60 (3-4) :57-62
[CH3OC2MPyr][FAP]	338.15	2.2	2.7	3.34	1.46	3.14	2.09	1.48	5.31	7.45	10.5	0.322	1.714	2.397	3.426	1.177	3.448	1.925	1.118	4.836	8.228	13.78	0.325	-0.220909	-0.112222	0.0257485	-0.193836	0.0980892	-0.0789474	-0.244595	-0.0892655	0.10443	0.312381	0.00931677	Andrzej Marciniak, Michał Wlazło. Activity coefficients at infinite dilution and physicochemical properties for organic solutes and water in the ionic liquid 1-(2-methoxyethyl)-1-methylpyrrolidinium trifluorotris(perfluoroethyl)phosphate. J. Chem. Thermodynamics, 2013, 60 (3-4) :57-62
[CH3OC2MPyr][FAP]	348.15	2.04	2.49	3.07	1.52	3.19	2.16	1.53	5.24	7.32	10.2	0.336	1.695	2.361	3.36	1.22	3.478	1.984	1.142	4.837	8.176	13.6	0.3387	-0.169118	-0.0518072	0.0944625	-0.197368	0.0902821	-0.0814815	-0.253595	-0.0769084	0.11694	0.333333	0.00803571	Andrzej Marciniak, Michał Wlazło. Activity coefficients at infinite dilution and physicochemical properties for organic solutes and water in the ionic liquid 1-(2-methoxyethyl)-1-methylpyrrolidinium trifluorotris(perfluoroethyl)phosphate. J. Chem. Thermodynamics, 2013, 60 (3-4) :57-62
[CH3OC2MPyr][FAP]	358.15	1.9	2.3	2.82	1.58	3.23	2.22	1.58	5.18	7.19	9.85	0.352	1.675	2.323	3.293	1.26	3.5	2.038	1.164	4.825	8.102	13.39	0.352	-0.118421	0.01	0.16773	-0.202532	0.0835913	-0.081982	-0.263291	-0.0685328	0.126843	0.359391	0	Andrzej Marciniak, Michał Wlazło. Activity coefficients at infinite dilution and physicochemical properties for organic solutes and water in the ionic liquid 1-(2-methoxyethyl)-1-methylpyrrolidinium trifluorotris(perfluoroethyl)phosphate. J. Chem. Thermodynamics, 2013, 60 (3-4) :57-62
[CH3OC2MPyr][FAP]	368.15	1.77	2.11	2.57	1.64	3.28	2.28	1.62	5.1	7.1	9.63	0.364	1.653	2.285	3.226	1.298	3.517	2.088	1.184	4.8	8.01	13.15	0.3648	-0.0661017	0.0829384	0.255253	-0.208537	0.0722561	-0.0842105	-0.269136	-0.0588235	0.128169	0.365524	0.0021978	Andrzej Marciniak, Michał Wlazło. Activity coefficients at infinite dilution and physicochemical properties for organic solutes and water in the ionic liquid 1-(2-methoxyethyl)-1-methylpyrrolidinium trifluorotris(perfluoroethyl)phosphate. J. Chem. Thermodynamics, 2013, 60 (3-4) :57-62
[CH3OC2MPyr][NTf2]	318.15	1.77	2.2	2.87	2.76	6.31	4.08	2.79	9.74	14.1	20.8	0.467	1.521	2.166	3.156	2.974	7.627	4.968	2.378	9.845	17.15	29.42	0.4394	-0.140678	-0.0154545	0.0996516	0.0775362	0.208716	0.217647	-0.14767	0.0107803	0.216312	0.414423	-0.0591006	Andrzej Marciniak, Michał Wlazło. Activity coefficients at infinite dilution and physicochemical properties for organic solutes and water in the ionic liquid 1-(2-methoxyethyl)-1-methylpyrrolidinium bis(trifluoromethylsulfonyl)-amide. J. Chem. Thermodynamics, 2012, 54: 90–96
[CH3OC2MPyr][NTf2]	328.15	1.63	2.02	2.6	2.79	6.19	4.06	2.79	9.34	13.4	19.5	0.469	1.469	2.081	3.015	3.008	7.534	4.991	2.385	9.398	16.25	27.64	0.4428	-0.098773	0.030198	0.159615	0.0781362	0.217124	0.22931	-0.145161	0.00620985	0.212687	0.417436	-0.0558635	Andrzej Marciniak, Michał Wlazło. Activity coefficients at infinite dilution and physicochemical properties for organic solutes and water in the ionic liquid 1-(2-methoxyethyl)-1-methylpyrrolidinium bis(trifluoromethylsulfonyl)-amide. J. Chem. Thermodynamics, 2012, 54: 90–96
[CH3OC2MPyr][NTf2]	338.15	1.48	1.86	2.35	2.81	6.12	4.05	2.78	8.92	12.9	18.2	0.472	1.421	2.003	2.886	3.036	7.435	5.005	2.389	8.983	15.41	26.02	0.4458	-0.0398649	0.0768817	0.228085	0.080427	0.214869	0.235802	-0.140647	0.00706278	0.194574	0.42967	-0.0555085	Andrzej Marciniak, Michał Wlazło. Activity coefficients at infinite dilution and physicochemical properties for organic solutes and water in the ionic liquid 1-(2-methoxyethyl)-1-methylpyrrolidinium bis(trifluoromethylsulfonyl)-amide. J. Chem. Thermodynamics, 2012, 54: 90–96
[CH3OC2MPyr][NTf2]	348.15	1.38	1.71	2.16	2.84	6.03	4.03	2.78	8.61	12.3	17.3	0.474	1.377	1.931	2.769	3.058	7.33	5.01	2.39	8.598	14.64	24.53	0.4485	-0.00217391	0.12924	0.281944	0.0767606	0.215589	0.243176	-0.140288	-0.00139373	0.190244	0.417919	-0.0537975	Andrzej Marciniak, Michał Wlazło. Activity coefficients at infinite dilution and physicochemical properties for organic solutes and water in the ionic liquid 1-(2-methoxyethyl)-1-methylpyrrolidinium bis(trifluoromethylsulfonyl)-amide. J. Chem. Thermodynamics, 2012, 54: 90–96
[CH3OC2MPyr][NTf2]	358.15	1.28	1.58	1.98	2.86	5.94	4.01	2.78	8.24	11.8	16.3	0.477	1.336	1.866	2.662	3.076	7.221	5.008	2.389	8.24	13.93	23.17	0.4507	0.04375	0.181013	0.344444	0.0755245	0.215657	0.248878	-0.140647	0	0.180508	0.421472	-0.0551363	Andrzej Marciniak, Michał Wlazło. Activity coefficients at infinite dilution and physicochemical properties for organic solutes and water in the ionic liquid 1-(2-methoxyethyl)-1-methylpyrrolidinium bis(trifluoromethylsulfonyl)-amide. J. Chem. Thermodynamics, 2012, 54: 90–96
[CH3OC2MPyr][NTf2]	368.15	1.2	1.48	1.84	2.89	5.85	4	2.78	7.96	11.4	15.6	0.479	1.298	1.805	2.563	3.089	7.109	4.998	2.385	7.906	13.27	21.91	0.4527	0.0816667	0.219595	0.392935	0.0688581	0.215214	0.2495	-0.142086	-0.00678392	0.164035	0.404487	-0.0549061	Andrzej Marciniak, Michał Wlazło. Activity coefficients at infinite dilution and physicochemical properties for organic solutes and water in the ionic liquid 1-(2-methoxyethyl)-1-methylpyrrolidinium bis(trifluoromethylsulfonyl)-amide. J. Chem. Thermodynamics, 2012, 54: 90–96
[CH3OC2Mmor][FAP]	318.15	2.1	2.79	3.73	1.58	4.39	2.48	1.64	9.54	13.9	20.9	0.227	1.336	2.002	3.071	1.505	5.083	2.647	1.407	7.225	13.25	23.92	0.2298	-0.36381	-0.282437	-0.176676	-0.0474684	0.157859	0.0673387	-0.142073	-0.242662	-0.0467626	0.144498	0.0123348	Michał Wlazło, Andrzej Marciniak. Activity coefficients at infinite dilution and physicochemical properties for organic solutes and water in the ionic liquid 4-(2-methoxyethyl)-4-methylmorpholinium trifluorotris(perfluoroethyl)phosphate. J. Chem. Thermodynamics, 2012, 54: 366–372
[CH3OC2Mmor][FAP]	328.15	1.94	2.55	3.36	1.65	4.39	2.55	1.68	9.11	13.3	19.6	0.241	1.35	2.019	3.087	1.58	5.195	2.767	1.452	7.291	13.3	23.89	0.2437	-0.304124	-0.208235	-0.08125	-0.0424242	0.183371	0.085098	-0.135714	-0.199671	0	0.218878	0.0112033	Michał Wlazło, Andrzej Marciniak. Activity coefficients at infinite dilution and physicochemical properties for organic solutes and water in the ionic liquid 4-(2-methoxyethyl)-4-methylmorpholinium trifluorotris(perfluoroethyl)phosphate. J. Chem. Thermodynamics, 2012, 54: 366–372
[CH3OC2Mmor][FAP]	338.15	1.82	2.35	3.08	1.72	4.4	2.61	1.73	8.73	12.7	18.5	0.256	1.361	2.03	3.096	1.652	5.294	2.881	1.494	7.328	13.3	23.76	0.2573	-0.252198	-0.13617	0.00519481	-0.0395349	0.203182	0.103831	-0.136416	-0.160596	0.0472441	0.284324	0.00507812	Michał Wlazło, Andrzej Marciniak. Activity coefficients at infinite dilution and physicochemical properties for organic solutes and water in the ionic liquid 4-(2-methoxyethyl)-4-methylmorpholinium trifluorotris(perfluoroethyl)phosphate. J. Chem. Thermodynamics, 2012, 54: 366–372
[CH3OC2Mmor][FAP]	348.15	1.69	2.18	2.81	1.78	4.41	2.67	1.78	8.35	12.2	17.5	0.27	1.369	2.037	3.097	1.72	5.382	2.989	1.534	7.34	13.25	23.55	0.2707	-0.189941	-0.0655963	0.102135	-0.0337079	0.220408	0.119476	-0.138202	-0.120958	0.0860656	0.345714	0.00259259	Michał Wlazło, Andrzej Marciniak. Activity coefficients at infinite dilution and physicochemical properties for organic solutes and water in the ionic liquid 4-(2-methoxyethyl)-4-methylmorpholinium trifluorotris(perfluoroethyl)phosphate. J. Chem. Thermodynamics, 2012, 54: 366–372
[CH3OC2Mmor][FAP]	358.15	1.58	2.04	2.6	1.84	4.41	2.72	1.81	8.03	11.6	16.6	0.284	1.375	2.04	3.094	1.786	5.458	3.09	1.571	7.33	13.17	23.28	0.284	-0.129747	0	0.19	-0.0293478	0.237642	0.136029	-0.132044	-0.0871731	0.135345	0.40241	0	Michał Wlazło, Andrzej Marciniak. Activity coefficients at infinite dilution and physicochemical properties for organic solutes and water in the ionic liquid 4-(2-methoxyethyl)-4-methylmorpholinium trifluorotris(perfluoroethyl)phosphate. J. Chem. Thermodynamics, 2012, 54: 366–372
[CH3OC2Mmor][FAP]	368.15	1.5	1.92	2.41	1.91	4.42	2.78	1.86	7.77	11.2	15.7	0.299	1.378	2.04	3.085	1.848	5.524	3.185	1.605	7.302	13.05	22.95	0.2969	-0.0813333	0.0625	0.280083	-0.0324607	0.249774	0.145683	-0.137097	-0.0602317	0.165179	0.461783	-0.00702341	Michał Wlazło, Andrzej Marciniak. Activity coefficients at infinite dilution and physicochemical properties for organic solutes and water in the ionic liquid 4-(2-methoxyethyl)-4-methylmorpholinium trifluorotris(perfluoroethyl)phosphate. J. Chem. Thermodynamics, 2012, 54: 366–372
[C4MPyr][C(CN)3]	318.15	0.967	1.14	1.43	3.45	N.A	N.A	3.34	10.6	15	21.8	0.558	0.7375	1.009	1.411	3.597	N.A	N.A	2.792	9.673	16.18	26.65	0.5567	-0.237332	-0.114912	-0.0132867	0.0426087	N.A	N.A	-0.164072	-0.0874528	0.0786667	0.222477	-0.00232975	Urszula Domańska, Elena Vadimovna Lukoshko. Measurements of activity coefficients at infinite dilution for organic solutes and water in the ionic liquid 1-butyl-1-methylpyrrolidinium tricyanomethanide. J. Chem. Thermodynamics, 2013, 66 (3): 144-150
[C4MPyr][C(CN)3]	328.15	0.918	1.08	1.34	3.52	N.A	N.A	3.37	10.3	14.7	21	0.563	0.7477	1.02	1.423	3.634	N.A	N.A	2.804	9.543	15.89	26.03	0.5617	-0.185512	-0.0555556	0.0619403	0.0323864	N.A	N.A	-0.167953	-0.0734951	0.0809524	0.239524	-0.00230906	Urszula Domańska, Elena Vadimovna Lukoshko. Measurements of activity coefficients at infinite dilution for organic solutes and water in the ionic liquid 1-butyl-1-methylpyrrolidinium tricyanomethanide. J. Chem. Thermodynamics, 2013, 66 (3): 144-150
[C4MPyr][C(CN)3]	338.15	0.876	1.03	1.27	3.56	N.A	N.A	3.38	10	14.2	20.1	0.566	0.7567	1.03	1.434	3.66	N.A	N.A	2.811	9.407	15.59	25.41	0.566	-0.136187	0	0.129134	0.0280899	N.A	N.A	-0.168343	-0.0593	0.0978873	0.264179	0	Urszula Domańska, Elena Vadimovna Lukoshko. Measurements of activity coefficients at infinite dilution for organic solutes and water in the ionic liquid 1-butyl-1-methylpyrrolidinium tricyanomethanide. J. Chem. Thermodynamics, 2013, 66 (3): 144-150
[C4MPyr][C(CN)3]	348.15	0.836	0.983	1.22	3.58	N.A	N.A	3.37	9.68	13.7	19.2	0.569	0.7646	1.039	1.442	3.678	N.A	N.A	2.813	9.268	15.28	24.79	0.5699	-0.0854067	0.0569685	0.181967	0.0273743	N.A	N.A	-0.165282	-0.042562	0.115328	0.291146	0.00158172	Urszula Domańska, Elena Vadimovna Lukoshko. Measurements of activity coefficients at infinite dilution for organic solutes and water in the ionic liquid 1-butyl-1-methylpyrrolidinium tricyanomethanide. J. Chem. Thermodynamics, 2013, 66 (3): 144-150
[C4MPyr][C(CN)3]	358.15	0.801	0.945	1.16	3.62	N.A	N.A	3.39	9.42	13.3	18.5	0.572	0.7716	1.046	1.449	3.688	N.A	N.A	2.81	9.127	14.97	24.18	0.5733	-0.0367041	0.106878	0.249138	0.0187845	N.A	N.A	-0.171091	-0.031104	0.125564	0.307027	0.00227273	Urszula Domańska, Elena Vadimovna Lukoshko. Measurements of activity coefficients at infinite dilution for organic solutes and water in the ionic liquid 1-butyl-1-methylpyrrolidinium tricyanomethanide. J. Chem. Thermodynamics, 2013, 66 (3): 144-150
[C4MPyr][C(CN)3]	368.15	0.77	0.913	1.11	3.69	N.A	N.A	3.4	9.15	12.9	17.8	0.576	0.7777	1.052	1.454	3.691	N.A	N.A	2.804	8.983	14.67	23.57	0.5763	0.01	0.152245	0.30991	0.000271003	N.A	N.A	-0.175294	-0.0182514	0.137209	0.324157	0.000520833	Urszula Domańska, Elena Vadimovna Lukoshko. Measurements of activity coefficients at infinite dilution for organic solutes and water in the ionic liquid 1-butyl-1-methylpyrrolidinium tricyanomethanide. J. Chem. Thermodynamics, 2013, 66 (3): 144-150
[C4MPy][N(CN)2]	308.15	N.A	N.A	N.A	6.76	18	N.A	6.37	22.4	33.1	49.7	N.A	N.A	N.A	N.A	7.025	16.45	N.A	4.844	16.85	29.63	51.28	N.A	N.A	N.A	N.A	0.0392012	-0.0861111	N.A	-0.23956	-0.247768	-0.104834	0.0317907	N.A	Marek Królikowski, Marta Królikowska. The study of activity coefficients at infinite dilution for organic solutes and water in 1-butyl-4-methylpyridinium dicyanamide, [B4MPy][DCA] using GLC. J. Chem. Thermodynamics, 2014, 68 (1): 138-144
[C4MPy][N(CN)2]	318.15	N.A	N.A	N.A	6.77	17.5	N.A	6.33	21.4	31.2	46.7	N.A	N.A	N.A	N.A	7.022	16.36	N.A	4.837	16.64	29.18	50.36	N.A	N.A	N.A	N.A	0.037223	-0.0651429	N.A	-0.235861	-0.22243	-0.0647436	0.0783726	N.A	Marek Królikowski, Marta Królikowska. The study of activity coefficients at infinite dilution for organic solutes and water in 1-butyl-4-methylpyridinium dicyanamide, [B4MPy][DCA] using GLC. J. Chem. Thermodynamics, 2014, 68 (1): 138-144
[C4MPy][N(CN)2]	328.15	N.A	N.A	N.A	6.78	17	N.A	6.29	20.4	29.7	44	N.A	N.A	N.A	N.A	7.015	16.25	N.A	4.827	16.44	28.74	49.46	N.A	N.A	N.A	N.A	0.0346608	-0.0441176	N.A	-0.232591	-0.194118	-0.0323232	0.124091	N.A	Marek Królikowski, Marta Królikowska. The study of activity coefficients at infinite dilution for organic solutes and water in 1-butyl-4-methylpyridinium dicyanamide, [B4MPy][DCA] using GLC. J. Chem. Thermodynamics, 2014, 68 (1): 138-144
[C4MPy][N(CN)2]	338.15	0.549	0.678	0.88	6.78	16.7	N.A	6.26	19.5	28.3	41.8	0.736	0.5005	0.7171	1.05	7.004	16.14	N.A	4.816	16.23	28.31	48.57	0.7428	-0.0883424	0.0576696	0.193182	0.0330383	-0.0335329	N.A	-0.230671	-0.167692	0.000353357	0.161962	0.00923913	Marek Królikowski, Marta Królikowska. The study of activity coefficients at infinite dilution for organic solutes and water in 1-butyl-4-methylpyridinium dicyanamide, [B4MPy][DCA] using GLC. J. Chem. Thermodynamics, 2014, 68 (1): 138-144
[C4MPy][N(CN)2]	348.15	0.545	0.663	0.855	6.79	16.3	N.A	6.22	18.7	27	39.5	0.748	0.5325	0.7629	1.117	6.99	16.02	N.A	4.802	16.03	27.88	47.7	0.7514	-0.0229358	0.150679	0.306433	0.0294551	-0.0171779	N.A	-0.227974	-0.142781	0.0325926	0.207595	0.00454545	Marek Królikowski, Marta Królikowska. The study of activity coefficients at infinite dilution for organic solutes and water in 1-butyl-4-methylpyridinium dicyanamide, [B4MPy][DCA] using GLC. J. Chem. Thermodynamics, 2014, 68 (1): 138-144
[C4MPy][N(CN)2]	358.15	0.541	0.65	0.84	6.8	15.9	N.A	6.19	17.8	25.9	37.6	0.76	0.5641	0.8081	1.183	6.973	15.9	N.A	4.787	15.84	27.46	46.85	0.759	0.0426987	0.243231	0.408333	0.0254412	0	N.A	-0.226656	-0.110112	0.0602317	0.246011	-0.00131579	Marek Królikowski, Marta Królikowska. The study of activity coefficients at infinite dilution for organic solutes and water in 1-butyl-4-methylpyridinium dicyanamide, [B4MPy][DCA] using GLC. J. Chem. Thermodynamics, 2014, 68 (1): 138-144
[C4MPy][N(CN)2]	368.15	0.537	0.638	0.814	6.8	15.6	N.A	6.15	17.3	24.8	35.7	0.764	0.5952	0.8527	1.247	6.953	15.77	N.A	4.771	15.64	27.05	46.02	0.7659	0.10838	0.33652	0.531941	0.0225	0.0108974	N.A	-0.224228	-0.0959538	0.0907258	0.289076	0.00248691	Marek Królikowski, Marta Królikowska. The study of activity coefficients at infinite dilution for organic solutes and water in 1-butyl-4-methylpyridinium dicyanamide, [B4MPy][DCA] using GLC. J. Chem. Thermodynamics, 2014, 68 (1): 138-144
[C4Mmor][C(CN)3]	318.15	1.26	1.62	2.18	5.74	16.8	N.A	5.39	22.6	34.1	52.7	0.617	0.9054	1.339	2.026	5.743	14.43	N.A	4.133	14.62	26.45	47.1	0.6166	-0.281429	-0.173457	-0.0706422	0.000522648	-0.141071	N.A	-0.23321	-0.353097	-0.22434	-0.106262	-0.000648298	Urszula Domańska, Elena Vadimovna Lukoshko. Thermodynamics and activity coefficients at infinite dilution for organic solutes and water in the ionic liquid 1-butyl-1-methylmorpholinium tricyanomethanide. J. Chem. Thermodynamics, 2014, 68: 53–59
[C4Mmor][C(CN)3]	328.15	1.19	1.52	2.04	5.77	16.2	N.A	5.33	21.3	32	49.1	0.62	0.9084	1.344	2.032	5.834	14.52	N.A	4.175	14.48	26.14	46.42	0.6205	-0.236639	-0.115789	-0.00392157	0.0110919	-0.103704	N.A	-0.216698	-0.320188	-0.183125	-0.0545825	0.000806452	Urszula Domańska, Elena Vadimovna Lukoshko. Thermodynamics and activity coefficients at infinite dilution for organic solutes and water in the ionic liquid 1-butyl-1-methylmorpholinium tricyanomethanide. J. Chem. Thermodynamics, 2014, 68: 53–59
[C4Mmor][C(CN)3]	338.15	1.12	1.43	1.91	5.74	15.6	N.A	5.27	20	30.2	45.7	0.624	0.911	1.347	2.037	5.911	14.58	N.A	4.21	14.34	25.81	45.71	0.6237	-0.186607	-0.058042	0.0664921	0.0297909	-0.0653846	N.A	-0.201139	-0.283	-0.145364	0.000218818	-0.000480769	Urszula Domańska, Elena Vadimovna Lukoshko. Thermodynamics and activity coefficients at infinite dilution for organic solutes and water in the ionic liquid 1-butyl-1-methylmorpholinium tricyanomethanide. J. Chem. Thermodynamics, 2014, 68: 53–59
[C4Mmor][C(CN)3]	348.15	1.06	1.35	1.79	5.76	15.3	N.A	5.24	19.1	28.7	43	0.624	0.9132	1.351	2.042	5.976	14.61	N.A	4.238	14.18	25.46	44.98	0.6263	-0.138491	0.000740741	0.140782	0.0375	-0.045098	N.A	-0.191221	-0.257592	-0.112892	0.0460465	0.0036859	Urszula Domańska, Elena Vadimovna Lukoshko. Thermodynamics and activity coefficients at infinite dilution for organic solutes and water in the ionic liquid 1-butyl-1-methylmorpholinium tricyanomethanide. J. Chem. Thermodynamics, 2014, 68: 53–59
[C4Mmor][C(CN)3]	358.15	1.01	1.29	1.7	5.77	14.9	N.A	5.21	18.2	27.2	40.6	0.629	0.9151	1.353	2.045	6.029	14.62	N.A	4.259	14.02	25.1	44.22	0.6284	-0.0939604	0.0488372	0.202941	0.0448873	-0.0187919	N.A	-0.182534	-0.22967	-0.0772059	0.0891626	-0.000953895	Urszula Domańska, Elena Vadimovna Lukoshko. Thermodynamics and activity coefficients at infinite dilution for organic solutes and water in the ionic liquid 1-butyl-1-methylmorpholinium tricyanomethanide. J. Chem. Thermodynamics, 2014, 68: 53–59
[C4Mmor][C(CN)3]	368.15	0.965	1.23	1.61	5.78	14.6	N.A	5.16	17.4	25.7	38.1	0.63	0.9167	1.356	2.048	6.072	14.6	N.A	4.275	13.85	24.73	43.44	0.6301	-0.0500518	0.102439	0.27205	0.050519	0	N.A	-0.171512	-0.204023	-0.0377432	0.140157	0.00015873	Urszula Domańska, Elena Vadimovna Lukoshko. Thermodynamics and activity coefficients at infinite dilution for organic solutes and water in the ionic liquid 1-butyl-1-methylmorpholinium tricyanomethanide. J. Chem. Thermodynamics, 2014, 68: 53–59
[C4MPyr][B(CN)4]	318.15	1.29	1.5	1.88	2.37	N.A	N.A	2.32	7.68	10.7	15.4	N.A	0.8658	1.136	1.524	2.323	N.A	N.A	1.924	6.667	10.7	16.9	N.A	-0.328837	-0.242667	-0.189362	-0.0198312	N.A	N.A	-0.17069	-0.131901	0	0.0974026	N.A	Urszula Domańska, Marek Królikowski, William E. Acree Jr. Thermodynamics and activity coefficients at infinite dilution measurements for organic solutes and water in the ionic liquid 1-butyl-1-methylpyrrolidinium tetracyanoborate. J. Chem. Thermodynamics, 2011, 43: 1810–1817
[C4MPyr][B(CN)4]	328.15	1.17	1.36	1.67	2.39	N.A	N.A	2.33	7.31	10.2	14.6	N.A	0.8704	1.144	1.538	2.389	N.A	N.A	1.964	6.65	10.67	16.84	N.A	-0.256068	-0.158824	-0.0790419	-0.00041841	N.A	N.A	-0.157082	-0.0902873	0.0460784	0.153425	N.A	Urszula Domańska, Marek Królikowski, William E. Acree Jr. Thermodynamics and activity coefficients at infinite dilution measurements for organic solutes and water in the ionic liquid 1-butyl-1-methylpyrrolidinium tetracyanoborate. J. Chem. Thermodynamics, 2011, 43: 1810–1817
[C4MPyr][B(CN)4]	338.15	1.09	1.27	1.55	2.46	N.A	N.A	2.34	7.16	10	14.1	N.A	0.8742	1.152	1.551	2.449	N.A	N.A	2	6.626	10.62	16.75	N.A	-0.197982	-0.0929134	0.000645161	-0.00447154	N.A	N.A	-0.145299	-0.074581	0.062	0.187943	N.A	Urszula Domańska, Marek Królikowski, William E. Acree Jr. Thermodynamics and activity coefficients at infinite dilution measurements for organic solutes and water in the ionic liquid 1-butyl-1-methylpyrrolidinium tetracyanoborate. J. Chem. Thermodynamics, 2011, 43: 1810–1817
[C4MPyr][B(CN)4]	348.15	1.02	1.1	1.44	2.48	N.A	N.A	2.36	7.03	9.72	13.4	N.A	0.8774	1.158	1.562	2.503	N.A	N.A	2.032	6.595	10.56	16.65	N.A	-0.139804	0.0527273	0.0847222	0.00927419	N.A	N.A	-0.138983	-0.0618777	0.0864198	0.242537	N.A	Urszula Domańska, Marek Królikowski, William E. Acree Jr. Thermodynamics and activity coefficients at infinite dilution measurements for organic solutes and water in the ionic liquid 1-butyl-1-methylpyrrolidinium tetracyanoborate. J. Chem. Thermodynamics, 2011, 43: 1810–1817
[C4MPyr][B(CN)4]	358.15	0.95	1.1	1.33	2.52	N.A	N.A	2.37	6.57	9.09	12.6	N.A	0.8801	1.164	1.572	2.553	N.A	N.A	2.061	6.559	10.5	16.53	N.A	-0.0735789	0.0581818	0.181955	0.0130952	N.A	N.A	-0.13038	-0.00167428	0.155116	0.311905	N.A	Urszula Domańska, Marek Królikowski, William E. Acree Jr. Thermodynamics and activity coefficients at infinite dilution measurements for organic solutes and water in the ionic liquid 1-butyl-1-methylpyrrolidinium tetracyanoborate. J. Chem. Thermodynamics, 2011, 43: 1810–1817
[C4MPyr][B(CN)4]	368.15	0.894	1.04	1.23	2.55	N.A	N.A	2.39	6.57	8.93	12.5	N.A	0.8824	1.169	1.581	2.598	N.A	N.A	2.087	6.519	10.42	16.4	N.A	-0.0129754	0.124038	0.285366	0.0188235	N.A	N.A	-0.126778	-0.00776256	0.166853	0.312	N.A	Urszula Domańska, Marek Królikowski, William E. Acree Jr. Thermodynamics and activity coefficients at infinite dilution measurements for organic solutes and water in the ionic liquid 1-butyl-1-methylpyrrolidinium tetracyanoborate. J. Chem. Thermodynamics, 2011, 43: 1810–1817
[HiQuin][SCN]	308.15	N.A	N.A	N.A	8.61	20.6	N.A	7.48	20.2	23.5	30.2	N.A	N.A	N.A	N.A	8.618	13.5	N.A	4.692	14.17	23.16	37.27	N.A	N.A	N.A	N.A	0.000929152	-0.34466	N.A	-0.372727	-0.298515	-0.0144681	0.234106	N.A	Marta Królikowska, Monika Karpińska, Marek Królikowski. Measurements of activity coefficientsatinfinitedilution for organic solutes and water in N-hexylisoquinolinium thiocyanate, [HiQuin][SCN] using GLC. J. Chem.Thermodynamics, 2013, 62: 1–7
[HiQuin][SCN]	318.15	N.A	N.A	N.A	8.13	18.6	N.A	7.07	18.2	22	28.5	N.A	N.A	N.A	N.A	8.211	12.86	N.A	4.516	13.46	21.87	34.99	N.A	N.A	N.A	N.A	0.0099631	-0.308602	N.A	-0.361245	-0.26044	-0.00590909	0.227719	N.A	Marta Królikowska, Monika Karpińska, Marek Królikowski. Measurements of activity coefficientsatinfinitedilution for organic solutes and water in N-hexylisoquinolinium thiocyanate, [HiQuin][SCN] using GLC. J. Chem.Thermodynamics, 2013, 62: 1–7
[HiQuin][SCN]	328.15	0.6	0.693	0.846	7.65	17.2	N.A	6.69	16.9	20.9	27.1	1.02	0.4954	0.6563	0.8891	7.84	12.27	N.A	4.355	12.8	20.69	32.92	1.019	-0.174333	-0.0529582	0.0509456	0.0248366	-0.286628	N.A	-0.349028	-0.242604	-0.0100478	0.21476	-0.000980392	Marta Królikowska, Monika Karpińska, Marek Królikowski. Measurements of activity coefficientsatinfinitedilution for organic solutes and water in N-hexylisoquinolinium thiocyanate, [HiQuin][SCN] using GLC. J. Chem.Thermodynamics, 2013, 62: 1–7
[HiQuin][SCN]	338.15	0.59	0.681	0.829	7.18	15.7	N.A	6.34	15.4	19.5	25.6	1.01	0.4988	0.659	0.8901	7.502	11.74	N.A	4.206	12.2	19.61	31.03	1.011	-0.154576	-0.0323054	0.0737033	0.0448468	-0.252229	N.A	-0.336593	-0.207792	0.00564103	0.212109	0.000990099	Marta Królikowska, Monika Karpińska, Marek Królikowski. Measurements of activity coefficientsatinfinitedilution for organic solutes and water in N-hexylisoquinolinium thiocyanate, [HiQuin][SCN] using GLC. J. Chem.Thermodynamics, 2013, 62: 1–7
[HiQuin][SCN]	348.15	0.581	0.671	0.812	6.99	14.7	N.A	6.15	14.4	18.7	24.4	1	0.502	0.6615	0.8909	7.193	11.24	N.A	4.068	11.65	18.63	29.32	1.002	-0.135972	-0.014158	0.0971675	0.0290415	-0.235374	N.A	-0.338537	-0.190972	-0.00374332	0.201639	0.002	Marta Królikowska, Monika Karpińska, Marek Królikowski. Measurements of activity coefficientsatinfinitedilution for organic solutes and water in N-hexylisoquinolinium thiocyanate, [HiQuin][SCN] using GLC. J. Chem.Thermodynamics, 2013, 62: 1–7
[HiQuin][SCN]	358.15	0.574	0.664	0.802	6.61	13.8	N.A	5.91	13.3	17.7	23.2	0.994	0.505	0.664	0.8918	6.91	10.78	N.A	3.941	11.14	17.72	27.75	0.9928	-0.120209	0	0.11197	0.0453858	-0.218841	N.A	-0.333164	-0.162406	0.00112994	0.196121	-0.00120724	Marta Królikowska, Monika Karpińska, Marek Królikowski. Measurements of activity coefficientsatinfinitedilution for organic solutes and water in N-hexylisoquinolinium thiocyanate, [HiQuin][SCN] using GLC. J. Chem.Thermodynamics, 2013, 62: 1–7
[HiQuin][SCN]	368.15	0.566	0.653	0.788	6.28	12.8	N.A	5.66	12.3	16.9	22.2	0.982	0.5079	0.6663	0.8926	6.649	10.36	N.A	3.822	10.67	16.89	26.31	0.9826	-0.10265	0.0203675	0.132741	0.058758	-0.190625	N.A	-0.324735	-0.13252	-0.000591716	0.185135	0.000610998	Marta Królikowska, Monika Karpińska, Marek Królikowski. Measurements of activity coefficientsatinfinitedilution for organic solutes and water in N-hexylisoquinolinium thiocyanate, [HiQuin][SCN] using GLC. J. Chem.Thermodynamics, 2013, 62: 1–7
[C2MIm][SCN]	298.15	1.009	N.A	N.A	N.A	N.A	N.A	N.A	104.5	171	277	N.A	0.8346	N.A	N.A	N.A	N.A	N.A	N.A	82.36	160.5	308	N.A	-0.172844	N.A	N.A	N.A	N.A	N.A	N.A	-0.211866	-0.0614035	0.111913	N.A	Urszula Domańska, Andrzej Marciniak. Measurements of activity coefficients at infinite dilution of aromatic and aliphatic hydrocarbons, alcohols, and water in the new ionic liquid [EMIM][SCN] using GLC. J. Chem. Thermodynamics, 2008, 40 (5): 860-866
[C2MIm][SCN]	308.15	0.977	1.44	2.23	N.A	N.A	N.A	N.A	96.9	159	255	N.A	0.881	1.399	2.274	N.A	N.A	N.A	N.A	81.63	159	304.9	N.A	-0.09826	-0.0284722	0.0197309	N.A	N.A	N.A	N.A	-0.157585	0	0.195686	N.A	Urszula Domańska, Andrzej Marciniak. Measurements of activity coefficients at infinite dilution of aromatic and aliphatic hydrocarbons, alcohols, and water in the new ionic liquid [EMIM][SCN] using GLC. J. Chem. Thermodynamics, 2008, 40 (5): 860-866
[C2MIm][SCN]	318.15	0.946	1.38	2.13	N.A	N.A	N.A	N.A	90.9	149	238	N.A	0.9262	1.474	2.4	N.A	N.A	N.A	N.A	80.91	157.5	301.9	N.A	-0.0209302	0.0681159	0.126761	N.A	N.A	N.A	N.A	-0.109901	0.057047	0.268487	N.A	Urszula Domańska, Andrzej Marciniak. Measurements of activity coefficients at infinite dilution of aromatic and aliphatic hydrocarbons, alcohols, and water in the new ionic liquid [EMIM][SCN] using GLC. J. Chem. Thermodynamics, 2008, 40 (5): 860-866
[C2MIm][SCN]	328.15	0.919	1.33	2.05	N.A	N.A	N.A	N.A	85.1	140	221	N.A	0.9704	1.547	2.524	N.A	N.A	N.A	N.A	80.22	156.1	298.9	N.A	0.0559304	0.163158	0.23122	N.A	N.A	N.A	N.A	-0.0573443	0.115	0.352489	N.A	Urszula Domańska, Andrzej Marciniak. Measurements of activity coefficients at infinite dilution of aromatic and aliphatic hydrocarbons, alcohols, and water in the new ionic liquid [EMIM][SCN] using GLC. J. Chem. Thermodynamics, 2008, 40 (5): 860-866
[C2MIm][SCN]	338.15	0.893	1.28	1.96	N.A	N.A	N.A	N.A	80.2	133	206	N.A	1.013	1.619	2.645	N.A	N.A	N.A	N.A	79.54	154.7	295.9	N.A	0.134378	0.264844	0.34949	N.A	N.A	N.A	N.A	-0.00822943	0.163158	0.436408	N.A	Urszula Domańska, Andrzej Marciniak. Measurements of activity coefficients at infinite dilution of aromatic and aliphatic hydrocarbons, alcohols, and water in the new ionic liquid [EMIM][SCN] using GLC. J. Chem. Thermodynamics, 2008, 40 (5): 860-866
[C2MIm][SCN]	348.15	0.87	1.25	1.89	N.A	N.A	N.A	N.A	75.5	126	193	N.A	1.055	1.69	2.765	N.A	N.A	N.A	N.A	78.87	153.3	293	N.A	0.212644	0.352	0.462963	N.A	N.A	N.A	N.A	0.0446358	0.216667	0.518135	N.A	Urszula Domańska, Andrzej Marciniak. Measurements of activity coefficients at infinite dilution of aromatic and aliphatic hydrocarbons, alcohols, and water in the new ionic liquid [EMIM][SCN] using GLC. J. Chem. Thermodynamics, 2008, 40 (5): 860-866
[C2MIm][SCN]	358.15	0.85	1.21	1.82	N.A	N.A	N.A	N.A	71.7	120	183	N.A	1.096	1.759	2.882	N.A	N.A	N.A	N.A	78.22	151.9	290.2	N.A	0.289412	0.453719	0.583516	N.A	N.A	N.A	N.A	0.0909344	0.265833	0.585792	N.A	Urszula Domańska, Andrzej Marciniak. Measurements of activity coefficients at infinite dilution of aromatic and aliphatic hydrocarbons, alcohols, and water in the new ionic liquid [EMIM][SCN] using GLC. J. Chem. Thermodynamics, 2008, 40 (5): 860-866
[C2MIm][SCN]	368.15	0.83	1.18	1.77	N.A	N.A	N.A	N.A	N.A	N.A	N.A	N.A	1.136	1.826	2.998	N.A	N.A	N.A	N.A	N.A	N.A	N.A	N.A	0.368675	0.547458	0.693785	N.A	N.A	N.A	N.A	N.A	N.A	N.A	N.A	Urszula Domańska, Andrzej Marciniak. Measurements of activity coefficients at infinite dilution of aromatic and aliphatic hydrocarbons, alcohols, and water in the new ionic liquid [EMIM][SCN] using GLC. J. Chem. Thermodynamics, 2008, 40 (5): 860-866
[C2MIm][BF4]	303	N.A	N.A	N.A	N.A	N.A	N.A	N.A	46.24	N.A	N.A	N.A	N.A	N.A	N.A	N.A	N.A	N.A	N.A	66.55	N.A	N.A	N.A	N.A	N.A	N.A	N.A	N.A	N.A	N.A	0.43923	N.A	N.A	N.A	Gloria M. Foco, Susana B. Bottini, Nathalie Quezada, Juan C. de la Fuente, and Cor J. Peters. Activity Coefficients at Infinite Dilution in 1-Alkyl-3-methylimidazolium Tetrafluoroborate Ionic Liquids. J. Chem. Eng. Data, 2006, 51: 1088-1091
[C2MIm][BF4]	323	0.76	0.95	N.A	N.A	N.A	N.A	N.A	43.21	N.A	N.A	N.A	2.462	3.94	N.A	N.A	N.A	N.A	N.A	64.04	N.A	N.A	N.A	2.23947	3.14737	N.A	N.A	N.A	N.A	N.A	0.482064	N.A	N.A	N.A	Gloria M. Foco, Susana B. Bottini, Nathalie Quezada, Juan C. de la Fuente, and Cor J. Peters. Activity Coefficients at Infinite Dilution in 1-Alkyl-3-methylimidazolium Tetrafluoroborate Ionic Liquids. J. Chem. Eng. Data, 2006, 51: 1088-1091
[C2MIm][BF4]	343	N.A	0.7	N.A	N.A	N.A	N.A	N.A	36.64	N.A	N.A	N.A	N.A	N.A	N.A	N.A	N.A	N.A	N.A	61.68	N.A	N.A	N.A	N.A	N.A	N.A	N.A	N.A	N.A	N.A	0.683406	N.A	N.A	N.A	Gloria M. Foco, Susana B. Bottini, Nathalie Quezada, Juan C. de la Fuente, and Cor J. Peters. Activity Coefficients at Infinite Dilution in 1-Alkyl-3-methylimidazolium Tetrafluoroborate Ionic Liquids. J. Chem. Eng. Data, 2006, 51: 1088-1091
[C4MIm][BF4]	303	N.A	N.A	N.A	N.A	N.A	N.A	N.A	35.37	N.A	N.A	N.A	N.A	N.A	N.A	N.A	N.A	N.A	N.A	17.67	N.A	N.A	N.A	N.A	N.A	N.A	N.A	N.A	N.A	N.A	-0.500424	N.A	N.A	N.A	Gloria M. Foco, Susana B. Bottini, Nathalie Quezada, Juan C. de la Fuente, and Cor J. Peters. Activity Coefficients at Infinite Dilution in 1-Alkyl-3-methylimidazolium Tetrafluoroborate Ionic Liquids. J. Chem. Eng. Data 2006, 51: 1088-1091
[C4MIm][BF4]	323	1.91	2.64	N.A	N.A	N.A	N.A	N.A	32.22	N.A	N.A	N.A	1.485	1.996	N.A	N.A	N.A	N.A	N.A	17.18	N.A	N.A	N.A	-0.222513	-0.243939	N.A	N.A	N.A	N.A	N.A	-0.466791	N.A	N.A	N.A	Gloria M. Foco, Susana B. Bottini, Nathalie Quezada, Juan C. de la Fuente, and Cor J. Peters. Activity Coefficients at Infinite Dilution in 1-Alkyl-3-methylimidazolium Tetrafluoroborate Ionic Liquids. J. Chem. Eng. Data 2006, 51: 1088-1091
[C4MIm][BF4]	343	1.63	2.47	N.A	N.A	N.A	N.A	N.A	30.47	N.A	N.A	N.A	1.48	2	N.A	N.A	N.A	N.A	N.A	16.73	N.A	N.A	N.A	-0.0920245	-0.190283	N.A	N.A	N.A	N.A	N.A	-0.450935	N.A	N.A	N.A	Gloria M. Foco, Susana B. Bottini, Nathalie Quezada, Juan C. de la Fuente, and Cor J. Peters. Activity Coefficients at Infinite Dilution in 1-Alkyl-3-methylimidazolium Tetrafluoroborate Ionic Liquids. J. Chem. Eng. Data 2006, 51: 1088-1091
[C8MIm][BF4]	303	N.A	N.A	N.A	N.A	N.A	N.A	N.A	7.92	N.A	N.A	N.A	N.A	N.A	N.A	N.A	N.A	N.A	N.A	5.112	N.A	N.A	N.A	N.A	N.A	N.A	N.A	N.A	N.A	N.A	-0.354545	N.A	N.A	N.A	Gloria M. Foco, Susana B. Bottini, Nathalie Quezada, Juan C. de la Fuente, and Cor J. Peters. Activity Coefficients at Infinite Dilution in 1-Alkyl-3-methylimidazolium Tetrafluoroborate Ionic Liquids. J. Chem. Eng. Data 2006, 51: 1088-1091
[C8MIm][BF4]	323	1.24	1.44	N.A	N.A	N.A	N.A	3.2	7.51	N.A	N.A	N.A	0.9687	1.13	N.A	N.A	N.A	N.A	2.244	5.001	N.A	N.A	N.A	-0.21879	-0.215278	N.A	N.A	N.A	N.A	-0.29875	-0.334088	N.A	N.A	N.A	Gloria M. Foco, Susana B. Bottini, Nathalie Quezada, Juan C. de la Fuente, and Cor J. Peters. Activity Coefficients at Infinite Dilution in 1-Alkyl-3-methylimidazolium Tetrafluoroborate Ionic Liquids. J. Chem. Eng. Data 2006, 51: 1088-1091
[C8MIm][BF4]	343	1.1	1.27	N.A	N.A	N.A	N.A	3.39	7.42	N.A	N.A	N.A	0.9527	1.118	N.A	N.A	N.A	N.A	2.236	4.896	N.A	N.A	N.A	-0.133909	-0.119685	N.A	N.A	N.A	N.A	-0.340413	-0.340162	N.A	N.A	N.A	Gloria M. Foco, Susana B. Bottini, Nathalie Quezada, Juan C. de la Fuente, and Cor J. Peters. Activity Coefficients at Infinite Dilution in 1-Alkyl-3-methylimidazolium Tetrafluoroborate Ionic Liquids. J. Chem. Eng. Data 2006, 51: 1088-1091
[C6MIm][SCN]	298.15	0.844	N.A	N.A	8.78	N.A	N.A	8.67	28.7	34.2	42.1	N.A	0.384	N.A	N.A	6.573	N.A	N.A	4.097	9.417	14.02	20.55	N.A	-0.545024	N.A	N.A	-0.251367	N.A	N.A	-0.527451	-0.671882	-0.590058	-0.511876	N.A	Urszula Domańska, Andrzej Marciniak, Marta Królikowska, and Monika Arasimowicz. Activity Coefficients at Infinite Dilution Measurements for Organic Solutes and Water in the Ionic Liquid 1-Hexyl-3-methylimidazolium Thiocyanate. J. Chem. Eng. Data 2010, 55: 2532–2536
[C6MIm][SCN]	308.15	0.819	N.A	N.A	8.78	N.A	N.A	8.54	27.4	33	41	N.A	0.403	N.A	N.A	6.612	N.A	N.A	4.119	9.377	13.96	20.47	N.A	-0.507937	N.A	N.A	-0.246925	N.A	N.A	-0.517681	-0.657774	-0.57697	-0.500732	N.A	Urszula Domańska, Andrzej Marciniak, Marta Królikowska, and Monika Arasimowicz. Activity Coefficients at Infinite Dilution Measurements for Organic Solutes and Water in the Ionic Liquid 1-Hexyl-3-methylimidazolium Thiocyanate. J. Chem. Eng. Data 2010, 55: 2532–2536
[C6MIm][SCN]	318.15	0.799	N.A	N.A	8.75	N.A	N.A	8.39	26.2	32.1	39.9	N.A	0.4213	N.A	N.A	6.648	N.A	N.A	4.14	9.339	13.91	20.39	N.A	-0.472716	N.A	N.A	-0.240229	N.A	N.A	-0.506555	-0.64355	-0.566667	-0.488972	N.A	Urszula Domańska, Andrzej Marciniak, Marta Królikowska, and Monika Arasimowicz. Activity Coefficients at Infinite Dilution Measurements for Organic Solutes and Water in the Ionic Liquid 1-Hexyl-3-methylimidazolium Thiocyanate. J. Chem. Eng. Data 2010, 55: 2532–2536
[C6MIm][SCN]	328.15	0.778	0.927	1.16	8.73	N.A	N.A	8.29	25.3	31.2	39	N.A	0.4388	0.5356	0.6686	6.681	N.A	N.A	4.158	9.303	13.86	20.31	N.A	-0.43599	-0.422222	-0.423621	-0.234708	N.A	N.A	-0.498432	-0.632292	-0.555769	-0.479231	N.A	Urszula Domańska, Andrzej Marciniak, Marta Królikowska, and Monika Arasimowicz. Activity Coefficients at Infinite Dilution Measurements for Organic Solutes and Water in the Ionic Liquid 1-Hexyl-3-methylimidazolium Thiocyanate. J. Chem. Eng. Data 2010, 55: 2532–2536
[C6MIm][SCN]	338.15	0.76	0.906	1.13	8.72	N.A	N.A	8.17	24.4	30.3	38.1	N.A	0.4556	0.5576	0.6978	6.711	N.A	N.A	4.176	9.268	13.8	20.24	N.A	-0.400526	-0.384547	-0.382478	-0.23039	N.A	N.A	-0.488862	-0.620164	-0.544554	-0.468766	N.A	Urszula Domańska, Andrzej Marciniak, Marta Królikowska, and Monika Arasimowicz. Activity Coefficients at Infinite Dilution Measurements for Organic Solutes and Water in the Ionic Liquid 1-Hexyl-3-methylimidazolium Thiocyanate. J. Chem. Eng. Data 2010, 55: 2532–2536
[C6MIm][SCN]	348.15	0.742	0.889	1.11	8.72	N.A	N.A	8.08	23.5	29.6	37.3	N.A	0.4718	0.579	0.7262	6.739	N.A	N.A	4.191	9.235	13.76	20.16	N.A	-0.364151	-0.348706	-0.345766	-0.227179	N.A	N.A	-0.481312	-0.607021	-0.535135	-0.459517	N.A	Urszula Domańska, Andrzej Marciniak, Marta Królikowska, and Monika Arasimowicz. Activity Coefficients at Infinite Dilution Measurements for Organic Solutes and Water in the Ionic Liquid 1-Hexyl-3-methylimidazolium Thiocyanate. J. Chem. Eng. Data 2010, 55: 2532–2536
[C6MIm][SCN]	358.15	0.726	0.872	1.09	8.72	N.A	N.A	7.98	22.7	29	36.5	N.A	0.4872	0.5996	0.7539	6.763	N.A	N.A	4.206	9.204	13.71	20.09	N.A	-0.328926	-0.312385	-0.308349	-0.224427	N.A	N.A	-0.472932	-0.594537	-0.527241	-0.449589	N.A	Urszula Domańska, Andrzej Marciniak, Marta Królikowska, and Monika Arasimowicz. Activity Coefficients at Infinite Dilution Measurements for Organic Solutes and Water in the Ionic Liquid 1-Hexyl-3-methylimidazolium Thiocyanate. J. Chem. Eng. Data 2010, 55: 2532–2536
[C6MIm][SCN]	368.15	0.712	0.857	1.07	8.71	N.A	N.A	7.89	22.1	28.3	35.7	N.A	0.5021	0.6196	0.7808	6.786	N.A	N.A	4.219	9.173	13.66	20.03	N.A	-0.294803	-0.277013	-0.27028	-0.220896	N.A	N.A	-0.465272	-0.584932	-0.517314	-0.438936	N.A	Urszula Domańska, Andrzej Marciniak, Marta Królikowska, and Monika Arasimowicz. Activity Coefficients at Infinite Dilution Measurements for Organic Solutes and Water in the Ionic Liquid 1-Hexyl-3-methylimidazolium Thiocyanate. J. Chem. Eng. Data 2010, 55: 2532–2536
[C4MIm][NO3]	323	0.78	0.96	N.A	N.A	N.A	N.A	N.A	N.A	N.A	N.A	N.A	0.5298	0.7087	N.A	N.A	N.A	N.A	N.A	N.A	N.A	N.A	N.A	-0.320769	-0.261771	N.A	N.A	N.A	N.A	N.A	N.A	N.A	N.A	N.A	Gloria Foco, M. Dolores Bermejo, Aleksandra J. Kotlewska, Fred van Rantwijk, Cor J. Peters, and Susana B. Bottini. Activity Coefficients at Infinite Dilution in Methylimidazolium Nitrate Ionic Liquids. J. Chem. Eng. Data, 2011, 56: 517–520
[C4MIm][NO3]	363	0.72	0.9	N.A	N.A	N.A	N.A	N.A	N.A	N.A	N.A	N.A	0.6048	0.8158	N.A	N.A	N.A	N.A	N.A	N.A	N.A	N.A	N.A	-0.16	-0.0935556	N.A	N.A	N.A	N.A	N.A	N.A	N.A	N.A	N.A	Gloria Foco, M. Dolores Bermejo, Aleksandra J. Kotlewska, Fred van Rantwijk, Cor J. Peters, and Susana B. Bottini. Activity Coefficients at Infinite Dilution in Methylimidazolium Nitrate Ionic Liquids. J. Chem. Eng. Data, 2011, 56: 517–520
[C2MIM][NO3]	318.15	1.14	1.77	N.A	13.1	N.A	N.A	N.A	N.A	N.A	303	1.06	0.8325	1.314	N.A	13.97	N.A	N.A	N.A	N.A	N.A	290	0.664	-0.269737	-0.257627	N.A	0.0664122	N.A	N.A	N.A	N.A	N.A	-0.0429043	-0.373585	Marek Sobota, Vladimír Dohnal, and Pavel Vrbka. Activity Coefficients at Infinite Dilution of Organic Solutes in the Ionic Liquid 1-Ethyl-3-methyl-imidazolium Nitrate. J. Phys. Chem. B, 2009, 113: 4323–4332
[C2MIM][NO3]	323.15	1.11	1.73	N.A	13.7	N.A	N.A	N.A	N.A	N.A	295	1.07	0.8503	1.343	N.A	14.15	N.A	N.A	N.A	N.A	N.A	288	0.6722	-0.233964	-0.223699	N.A	0.0328467	N.A	N.A	N.A	N.A	N.A	-0.0237288	-0.371776	Marek Sobota, Vladimír Dohnal, and Pavel Vrbka. Activity Coefficients at Infinite Dilution of Organic Solutes in the Ionic Liquid 1-Ethyl-3-methyl-imidazolium Nitrate. J. Phys. Chem. B, 2009, 113: 4323–4332
[C2MIM][NO3]	333.15	1.08	1.66	N.A	14.5	N.A	N.A	N.A	N.A	N.A	284	1.08	0.8847	1.399	N.A	14.49	N.A	N.A	N.A	N.A	N.A	283.9	0.6874	-0.180833	-0.157229	N.A	-0.000689655	N.A	N.A	N.A	N.A	N.A	-0.000352113	-0.363519	Marek Sobota, Vladimír Dohnal, and Pavel Vrbka. Activity Coefficients at Infinite Dilution of Organic Solutes in the Ionic Liquid 1-Ethyl-3-methyl-imidazolium Nitrate. J. Phys. Chem. B, 2009, 113: 4323–4332
[C2MIM][NO3]	343.15	1.04	1.6	N.A	15.1	N.A	N.A	N.A	N.A	N.A	275	1.09	0.9176	1.452	N.A	14.82	N.A	N.A	N.A	N.A	N.A	279.7	0.7012	-0.117692	-0.0925	N.A	-0.018543	N.A	N.A	N.A	N.A	N.A	0.0170909	-0.356697	Marek Sobota, Vladimír Dohnal, and Pavel Vrbka. Activity Coefficients at Infinite Dilution of Organic Solutes in the Ionic Liquid 1-Ethyl-3-methyl-imidazolium Nitrate. J. Phys. Chem. B, 2009, 113: 4323–4332
[C2MIM][NO3]	353.15	1.02	1.55	N.A	15.5	N.A	N.A	N.A	N.A	N.A	265	1.1	0.9492	1.503	N.A	15.12	N.A	N.A	N.A	N.A	N.A	275.5	0.7138	-0.0694118	-0.0303226	N.A	-0.0245161	N.A	N.A	N.A	N.A	N.A	0.0396226	-0.351091	Marek Sobota, Vladimír Dohnal, and Pavel Vrbka. Activity Coefficients at Infinite Dilution of Organic Solutes in the Ionic Liquid 1-Ethyl-3-methyl-imidazolium Nitrate. J. Phys. Chem. B, 2009, 113: 4323–4332
[C4MIm][TOS]	338.15	0.359	0.437	N.A	8.28	N.A	N.A	6.57	18	24.2	33.1	N.A	0.3112	0.4368	N.A	8.281	N.A	N.A	5.005	11.54	19.71	33.13	N.A	-0.133148	-0.000457666	N.A	0.000120773	N.A	N.A	-0.238204	-0.358889	-0.185537	0.000906344	N.A	Urszula Domańska, and Marek Królikowski. Determination of Activity Coefficients at Infinite Dilution of 35 Solutes in the Ionic Liquid, 1-Butyl-3-methylimidazolium Tosylate, Using Gas-Liquid Chromatography. J. Chem. Eng. Data, 2010, 55: 4817–4822
[C4MIm][TOS]	348.15	0.357	0.434	N.A	7.84	N.A	N.A	6.36	16.6	22.5	31	N.A	0.3264	0.4568	N.A	8.09	N.A	N.A	4.905	11.28	19.15	32.02	N.A	-0.0857143	0.0525346	N.A	0.0318878	N.A	N.A	-0.228774	-0.320482	-0.148889	0.0329032	N.A	Urszula Domańska, and Marek Królikowski. Determination of Activity Coefficients at Infinite Dilution of 35 Solutes in the Ionic Liquid, 1-Butyl-3-methylimidazolium Tosylate, Using Gas-Liquid Chromatography. J. Chem. Eng. Data, 2010, 55: 4817–4822
[C4MIm][TOS]	358.15	0.358	0.437	N.A	7.58	N.A	N.A	6.16	15.7	21.5	29.5	N.A	0.3409	0.4759	N.A	7.906	N.A	N.A	4.809	11.02	18.62	30.96	N.A	-0.0477654	0.089016	N.A	0.0430079	N.A	N.A	-0.219318	-0.298089	-0.133953	0.0494915	N.A	Urszula Domańska, and Marek Królikowski. Determination of Activity Coefficients at Infinite Dilution of 35 Solutes in the Ionic Liquid, 1-Butyl-3-methylimidazolium Tosylate, Using Gas-Liquid Chromatography. J. Chem. Eng. Data, 2010, 55: 4817–4822
[C4MIm][TOS]	368.15	0.358	0.437	N.A	7.37	N.A	N.A	5.93	14.9	20.4	28.2	N.A	0.3548	0.494	N.A	7.729	N.A	N.A	4.716	10.77	18.11	29.94	N.A	-0.00893855	0.130435	N.A	0.048711	N.A	N.A	-0.204722	-0.277181	-0.112255	0.0617021	N.A	Urszula Domańska, and Marek Królikowski. Determination of Activity Coefficients at Infinite Dilution of 35 Solutes in the Ionic Liquid, 1-Butyl-3-methylimidazolium Tosylate, Using Gas-Liquid Chromatography. J. Chem. Eng. Data, 2010, 55: 4817–4822
[C4MIm][PF6]	315.9	3.02	4.01	5.59	N.A	N.A	N.A	N.A	N.A	N.A	N.A	N.A	2.388	3.613	5.591	N.A	N.A	N.A	N.A	N.A	N.A	N.A	N.A	-0.209272	-0.0990025	0.000178891	N.A	N.A	N.A	N.A	N.A	N.A	N.A	N.A	Yusuke Shimoyama, Takeshi Hirayama, and Yoshio Iwai. Measurement of Infinite Dilution Activity Coefficients of Alcohols, Ketones, and Aromatic Hydrocarbons in 4-Methyl-N-butylpyridinium Tetrafluoroborate and 1-Butyl-3-methylimidazolium Hexafluorophosphate by Gas-Liquid Chromatography. J. Chem. Eng. Data, 2008, 53: 2106–2111
[C4MIm][PF6]	325.3	2.69	3.46	4.77	N.A	N.A	N.A	N.A	N.A	N.A	N.A	N.A	2.347	3.548	5.487	N.A	N.A	N.A	N.A	N.A	N.A	N.A	N.A	-0.127509	0.0254335	0.150314	N.A	N.A	N.A	N.A	N.A	N.A	N.A	N.A	Yusuke Shimoyama, Takeshi Hirayama, and Yoshio Iwai. Measurement of Infinite Dilution Activity Coefficients of Alcohols, Ketones, and Aromatic Hydrocarbons in 4-Methyl-N-butylpyridinium Tetrafluoroborate and 1-Butyl-3-methylimidazolium Hexafluorophosphate by Gas-Liquid Chromatography. J. Chem. Eng. Data, 2008, 53: 2106–2111
[C4MIm][PF6]	334.8	2.47	3.18	4.24	N.A	N.A	N.A	N.A	N.A	N.A	N.A	N.A	2.307	3.485	5.383	N.A	N.A	N.A	N.A	N.A	N.A	N.A	N.A	-0.0659919	0.0959119	0.269575	N.A	N.A	N.A	N.A	N.A	N.A	N.A	N.A	Yusuke Shimoyama, Takeshi Hirayama, and Yoshio Iwai. Measurement of Infinite Dilution Activity Coefficients of Alcohols, Ketones, and Aromatic Hydrocarbons in 4-Methyl-N-butylpyridinium Tetrafluoroborate and 1-Butyl-3-methylimidazolium Hexafluorophosphate by Gas-Liquid Chromatography. J. Chem. Eng. Data, 2008, 53: 2106–2111
[C8MIm][BF4]	298	1.75	2.18	2.32	N.A	N.A	N.A	N.A	7.06	9.76	13.1	0.62	0.987	1.143	1.356	N.A	N.A	N.A		5.141	7.325	10.27	0.7472	-0.436	-0.475688	-0.415517	N.A	N.A	N.A	N.A	-0.271813	-0.249488	-0.216031	0.205161	Andreas Heintz and Sergey P. Verevkin. Thermodynamic Properties of Mixtures Containing Ionic Liquids. 6. Activity Coefficients at Infinite Dilution of Hydrocarbons, Alcohols, Esters, and Aldehydes in 1-Methyl-3-octyl-imidazolium Tetrafluoroborate Using Gas-Liquid Chromatography. J. Chem. Eng. Data, 2005, 50: 1515-1519
[C4MIm][BF4]	303.15	2.15	3.12	4.74	N.A	N.A	N.A	10.15	48.02	N.A	N.A	0.65	1.486	1.989	2.723	N.A	N.A	N.A	5.267	17.67	N.A	N.A	0.7511	-0.308837	-0.3625	-0.425527	N.A	N.A	N.A	-0.481084	-0.632028	N.A	N.A	0.155538	Anne-Laure Revelli, Fabrice Mutelet, Mireille Turmine, Roland Solimando, and Jean-Noël Jaubert. Activity Coefficients at Infinite Dilution of Organic Compounds in 1-Butyl-3-methylimidazolium Tetrafluoroborate Using Inverse Gas Chromatography. J. Chem. Eng. Data, 2009, 54: 90–101
[C4MIm][BF4]	312.55	1.91	2.7	3.82	N.A	N.A	N.A	9.39	39.33	N.A	N.A	0.63	1.486	1.993	2.735	N.A	N.A	N.A	5.276	17.43	N.A	N.A	0.7519	-0.22199	-0.261852	-0.284031	N.A	N.A	N.A	-0.438126	-0.556827	N.A	N.A	0.193492	Anne-Laure Revelli, Fabrice Mutelet, Mireille Turmine, Roland Solimando, and Jean-Noël Jaubert. Activity Coefficients at Infinite Dilution of Organic Compounds in 1-Butyl-3-methylimidazolium Tetrafluoroborate Using Inverse Gas Chromatography. J. Chem. Eng. Data, 2009, 54: 90–101
[C4MIm][BF4]	322.55	1.7	2.43	3.33	N.A	N.A	N.A	8.18	36.27	N.A	N.A	0.64	1.485	1.996	2.745	N.A	N.A	N.A	5.284	17.19	N.A	N.A	0.752	-0.126471	-0.178601	-0.175676	N.A	N.A	N.A	-0.354034	-0.526055	N.A	N.A	0.175	Anne-Laure Revelli, Fabrice Mutelet, Mireille Turmine, Roland Solimando, and Jean-Noël Jaubert. Activity Coefficients at Infinite Dilution of Organic Compounds in 1-Butyl-3-methylimidazolium Tetrafluoroborate Using Inverse Gas Chromatography. J. Chem. Eng. Data, 2009, 54: 90–101
[C4MIm][BF4]	332.55	1.53	2.14	2.69	N.A	N.A	N.A	7.42	38.84	N.A	N.A	0.61	1.483	1.998	2.755	N.A	N.A	N.A	5.291	16.96	N.A	N.A	0.7512	-0.030719	-0.0663551	0.0241636	N.A	N.A	N.A	-0.286927	-0.563337	N.A	N.A	0.231475	Anne-Laure Revelli, Fabrice Mutelet, Mireille Turmine, Roland Solimando, and Jean-Noël Jaubert. Activity Coefficients at Infinite Dilution of Organic Compounds in 1-Butyl-3-methylimidazolium Tetrafluoroborate Using Inverse Gas Chromatography. J. Chem. Eng. Data, 2009, 54: 90–101
[C6MIm][PF6]	298.15	N.A	N.A	N.A	N.A	N.A	N.A	N.A	10.42	15.32	21.89	N.A	N.A	N.A	N.A	N.A	N.A	N.A	N.A	7.507	12.42	20.24	N.A	N.A	N.A	N.A	N.A	N.A	N.A	N.A	-0.279559	-0.189295	-0.0753769	N.A	Trevor M. Letcher, Bathebele Soko, and Deresh Ramjugernath. Activity Coefficients at Infinite Dilution of Organic Solutes in 1-Hexyl-3-methylimidazolium Hexafluorophosphate from Gas-Liquid Chromatography. J. Chem. Eng. Data, 2003, 48: 708-711
[C6MIm][PF6]	313.15	N.A	N.A	N.A	N.A	N.A	N.A	N.A	9.09	13.75	19.54	N.A	N.A	N.A	N.A	N.A	N.A	N.A	N.A	7.306	12.05	19.55	N.A	N.A	N.A	N.A	N.A	N.A	N.A	N.A	-0.19626	-0.123636	0.000511771	N.A	Trevor M. Letcher, Bathebele Soko, and Deresh Ramjugernath. Activity Coefficients at Infinite Dilution of Organic Solutes in 1-Hexyl-3-methylimidazolium Hexafluorophosphate from Gas-Liquid Chromatography. J. Chem. Eng. Data, 2003, 48: 708-711
[C6MIm][PF6]	323.15	N.A	N.A	N.A	N.A	N.A	N.A	N.A	7.88	12.36	17.98	N.A	N.A	N.A	N.A	N.A	N.A	N.A	N.A	7.183	11.81	19.12	N.A	N.A	N.A	N.A	N.A	N.A	N.A	N.A	-0.0884518	-0.0444984	0.0634038	N.A	Trevor M. Letcher, Bathebele Soko, and Deresh Ramjugernath. Activity Coefficients at Infinite Dilution of Organic Solutes in 1-Hexyl-3-methylimidazolium Hexafluorophosphate from Gas-Liquid Chromatography. J. Chem. Eng. Data, 2003, 48: 708-711
[C4MIm][BF4]	303.15	1.588	2.802	4.141	N.A	N.A	N.A	N.A	N.A	N.A	N.A	0.734	1.486	1.989	2.723	N.A	N.A	N.A	N.A	N.A	N.A	N.A	0.7511	-0.0642317	-0.29015	-0.342429	N.A	N.A	N.A	N.A	N.A	N.A	N.A	0.023297	Qing Zhou, Li-Sheng Wang, Jun-Sheng Wu, and Mi-Yi Li. Activity Coefficients at Infinite Dilution of Polar Solutes in 1-Butyl-3-methylimidazolium Tetrafluoroborate Using Gas-Liquid Chromatography. J. Chem. Eng. Data, 2007, 52: 131-134
[C4MIm][BF4]	313.15	1.391	2.48	3.675	N.A	N.A	N.A	N.A	N.A	N.A	N.A	0.742	1.486	1.993	2.735	N.A	N.A	N.A	N.A	N.A	N.A	N.A	0.752	0.0682962	-0.196371	-0.255782	N.A	N.A	N.A	N.A	N.A	N.A	N.A	0.0134771	Qing Zhou, Li-Sheng Wang, Jun-Sheng Wu, and Mi-Yi Li. Activity Coefficients at Infinite Dilution of Polar Solutes in 1-Butyl-3-methylimidazolium Tetrafluoroborate Using Gas-Liquid Chromatography. J. Chem. Eng. Data, 2007, 52: 131-134
[C4MIm][BF4]	323.15	1.272	2.227	3.295	N.A	N.A	N.A	N.A	N.A	N.A	N.A	0.752	1.484	1.996	2.746	N.A	N.A	N.A	N.A	N.A	N.A	N.A	0.752	0.166667	-0.103727	-0.166616	N.A	N.A	N.A	N.A	N.A	N.A	N.A	0	Qing Zhou, Li-Sheng Wang, Jun-Sheng Wu, and Mi-Yi Li. Activity Coefficients at Infinite Dilution of Polar Solutes in 1-Butyl-3-methylimidazolium Tetrafluoroborate Using Gas-Liquid Chromatography. J. Chem. Eng. Data, 2007, 52: 131-134
[C4MIm][BF4]	333.15	1.165	1.958	2.984	N.A	N.A	N.A	N.A	N.A	N.A	N.A	0.757	1.482	1.999	2.755	N.A	N.A	N.A	N.A	N.A	N.A	N.A	0.7512	0.272103	0.0209397	-0.0767426	N.A	N.A	N.A	N.A	N.A	N.A	N.A	-0.00766182	Qing Zhou, Li-Sheng Wang, Jun-Sheng Wu, and Mi-Yi Li. Activity Coefficients at Infinite Dilution of Polar Solutes in 1-Butyl-3-methylimidazolium Tetrafluoroborate Using Gas-Liquid Chromatography. J. Chem. Eng. Data, 2007, 52: 131-134
[C4MIm][BF4]	343.15	1.067	1.638	2.72	N.A	N.A	N.A	N.A	N.A	N.A	N.A	0.768	1.48	2	2.763	N.A	N.A	N.A	N.A	N.A	N.A	N.A	0.7498	0.387067	0.221001	0.0158088	N.A	N.A	N.A	N.A	N.A	N.A	N.A	-0.0236979	Qing Zhou, Li-Sheng Wang, Jun-Sheng Wu, and Mi-Yi Li. Activity Coefficients at Infinite Dilution of Polar Solutes in 1-Butyl-3-methylimidazolium Tetrafluoroborate Using Gas-Liquid Chromatography. J. Chem. Eng. Data, 2007, 52: 131-134
[C6MIm][BF4]	298.15	N.A	N.A	N.A	N.A	N.A	N.A	N.A	10.9	15.2	21.8	N.A	N.A	N.A	N.A	N.A	N.A	N.A	N.A	8.451	12.71	18.81	N.A	N.A	N.A	N.A	N.A	N.A	N.A	N.A	-0.224679	-0.163816	-0.137156	N.A	Trevor M. Letcher, Bathabele Soko, and Prashant Reddy. Determination of Activity Coefficients at Infinite Dilution of Solutes in the Ionic Liquid 1-Hexyl-3-methylimidazolium Tetrafluoroborate Using Gas-Liquid Chromatography at the Temperatures 298.15 K and 323.15 K. J. Chem. Eng. Data, 2003, 48: 1587-1590
[C6MIm][BF4]	323.15	N.A	N.A	N.A	N.A	N.A	N.A	N.A	8.2	11.6	18.1	N.A	N.A	N.A	N.A	N.A	N.A	N.A	N.A	8.198	12.33	18.25	N.A	N.A	N.A	N.A	N.A	N.A	N.A	N.A	-0.000243902	0.062931	0.00828729	N.A	Trevor M. Letcher, Bathabele Soko, and Prashant Reddy. Determination of Activity Coefficients at Infinite Dilution of Solutes in the Ionic Liquid 1-Hexyl-3-methylimidazolium Tetrafluoroborate Using Gas-Liquid Chromatography at the Temperatures 298.15 K and 323.15 K. J. Chem. Eng. Data, 2003, 48: 1587-1590
[C4MIm][PF6]	298	N.A	N.A	N.A	N.A	N.A	N.A	N.A	18.08	N.A	N.A	N.A	N.A	N.A	N.A	N.A	N.A	N.A	N.A	15.68	N.A	N.A	N.A	N.A	N.A	N.A	N.A	N.A	N.A	N.A	-0.132743	N.A	N.A	N.A	Zhu Jiqin, YU Yanmei, CHEN Jian , FEI Weiyang. Measurement of activity coefficients at infinite dilution for hydrocarbons in imidazolium-based ionic liquids and QSPR model. Front. Chem. Eng. China, 2007, 1 (2): 190–194
[C4MIm][PF6]	308	N.A	N.A	N.A	N.A	N.A	N.A	N.A	16.72	N.A	N.A	N.A	N.A	N.A	N.A	N.A	N.A	N.A	N.A	15.35	N.A	N.A	N.A	N.A	N.A	N.A	N.A	N.A	N.A	N.A	-0.0819378	N.A	N.A	N.A	Zhu Jiqin, YU Yanmei, CHEN Jian , FEI Weiyang. Measurement of activity coefficients at infinite dilution for hydrocarbons in imidazolium-based ionic liquids and QSPR model. Front. Chem. Eng. China, 2007, 1 (2): 190–194
[C4MIm][PF6]	318	N.A	N.A	N.A	N.A	N.A	N.A	N.A	15.21	N.A	N.A	N.A	N.A	N.A	N.A	N.A	N.A	N.A	N.A	15.03	N.A	N.A	N.A	N.A	N.A	N.A	N.A	N.A	N.A	N.A	-0.0118343	N.A	N.A	N.A	Zhu Jiqin, YU Yanmei, CHEN Jian , FEI Weiyang. Measurement of activity coefficients at infinite dilution for hydrocarbons in imidazolium-based ionic liquids and QSPR model. Front. Chem. Eng. China, 2007, 1 (2): 190–194
[CH2=C(CH3)C1MIm][BF4]	298	N.A	N.A	N.A	N.A	N.A	N.A	N.A	47.37	N.A	N.A	N.A	N.A	N.A	N.A	N.A	N.A	N.A	N.A	20.31	N.A	N.A	N.A	N.A	N.A	N.A	N.A	N.A	N.A	N.A	-0.571248	N.A	N.A	N.A	Zhu Jiqin, YU Yanmei, CHEN Jian , FEI Weiyang. Measurement of activity coefficients at infinite dilution for hydrocarbons in imidazolium-based ionic liquids and QSPR model. Front. Chem. Eng. China, 2007, 1 (2): 190–194
[CH2=C(CH3)C1MIm][BF4]	308	N.A	N.A	N.A	N.A	N.A	N.A	N.A	40.26	N.A	N.A	N.A	N.A	N.A	N.A	N.A	N.A	N.A	N.A	20.15	N.A	N.A	N.A	N.A	N.A	N.A	N.A	N.A	N.A	N.A	-0.499503	N.A	N.A	N.A	Zhu Jiqin, YU Yanmei, CHEN Jian , FEI Weiyang. Measurement of activity coefficients at infinite dilution for hydrocarbons in imidazolium-based ionic liquids and QSPR model. Front. Chem. Eng. China, 2007, 1 (2): 190–194
[CH2=C(CH3)C1MIm][BF4]	318	N.A	N.A	N.A	N.A	N.A	N.A	N.A	36.49	N.A	N.A	N.A	N.A	N.A	N.A	N.A	N.A	N.A	N.A	19.99	N.A	N.A	N.A	N.A	N.A	N.A	N.A	N.A	N.A	N.A	-0.452179	N.A	N.A	N.A	Zhu Jiqin, YU Yanmei, CHEN Jian , FEI Weiyang. Measurement of activity coefficients at infinite dilution for hydrocarbons in imidazolium-based ionic liquids and QSPR model. Front. Chem. Eng. China, 2007, 1 (2): 190–194
[C4MPy][BF4]	313	1.754	2.477	3.625	7.388	N.A	11.87	N.A	N.A	N.A	N.A	0.58	1.445	2.012	2.865	7.266	N.A	11.87	N.A	N.A	N.A	N.A	0.5533	-0.176169	-0.187727	-0.209655	-0.0165133	N.A	0	N.A	N.A	N.A	N.A	-0.0460345	Andreas Heintz, Dmitry V. Kulikov, and Sergey P. Verevkin. Thermodynamic properties of mixtures containing ionic liquids. Activity coefficients at infinite dilution of polar solutes in 4-methyl-N-butyl-pyridinium tetrafluoroborate using gas–liquid chromatography. J. Chem. Thermodynamics, 2002, 34: 1341–1347
[C4MPy][BF4]	323	1.602	2.231	3.245	7.247	N.A	11.67	N.A	N.A	N.A	N.A	0.577	1.452	2.024	2.885	7.143	N.A	11.67	N.A	N.A	N.A	N.A	0.5622	-0.093633	-0.0927835	-0.11094	-0.0143508	N.A	0	N.A	N.A	N.A	N.A	-0.0256499	Andreas Heintz, Dmitry V. Kulikov, and Sergey P. Verevkin. Thermodynamic properties of mixtures containing ionic liquids. Activity coefficients at infinite dilution of polar solutes in 4-methyl-N-butyl-pyridinium tetrafluoroborate using gas–liquid chromatography. J. Chem. Thermodynamics, 2002, 34: 1341–1347
[C4MPy][BF4]	333	1.454	1.98	2.902	7.078	N.A	11.37	N.A	N.A	N.A	N.A	0.57	1.458	2.034	2.901	7.027	N.A	11.47	N.A	N.A	N.A	N.A	0.5701	0.00275103	0.0272727	-0.00034459	-0.00720543	N.A	0.00879507	N.A	N.A	N.A	N.A	0.000175439	Andreas Heintz, Dmitry V. Kulikov, and Sergey P. Verevkin. Thermodynamic properties of mixtures containing ionic liquids. Activity coefficients at infinite dilution of polar solutes in 4-methyl-N-butyl-pyridinium tetrafluoroborate using gas–liquid chromatography. J. Chem. Thermodynamics, 2002, 34: 1341–1347
[C4MPy][BF4]	343	1.33	1.843	2.591	6.908	N.A	11.08	N.A	N.A	N.A	N.A	0.564	1.462	2.041	2.914	6.917	N.A	11.29	N.A	N.A	N.A	N.A	0.5771	0.0992481	0.107434	0.124662	0.00130284	N.A	0.0189531	N.A	N.A	N.A	N.A	0.023227	Andreas Heintz, Dmitry V. Kulikov, and Sergey P. Verevkin. Thermodynamic properties of mixtures containing ionic liquids. Activity coefficients at infinite dilution of polar solutes in 4-methyl-N-butyl-pyridinium tetrafluoroborate using gas–liquid chromatography. J. Chem. Thermodynamics, 2002, 34: 1341–1347
[C8MIm][PF6]	313.15	2.27	N.A	N.A	N.A	N.A	N.A	N.A	6.31	8.2	10.5	N.A	1.635	N.A	N.A	N.A	N.A	N.A	N.A	4.446	6.801	10.24	N.A	-0.279736	N.A	N.A	N.A	N.A	N.A	N.A	-0.295404	-0.17061	-0.0247619	N.A	Eugene Olivier, Trevor M. Letcher, Paramespri Naidoo, Deresh Ramjugernath . Activity coefficients at infinite dilution of organic solutes in the ionic liquid 1-octyl-3-methylimidazolium hexafluorophosphate using gas–liquid chromatography at T = (313.15, 323.15, and 333.15) K. J. Chem. Thermodynamics, 2010, 42: 646–650
[C8MIm][PF6]	323.15	2.03	N.A	N.A	N.A	N.A	N.A	N.A	6.22	8.2	10.5	N.A	1.596	N.A	N.A	N.A	N.A	N.A	N.A	4.379	6.686	10.05	N.A	-0.213793	N.A	N.A	N.A	N.A	N.A	N.A	-0.295981	-0.184634	-0.0428571	N.A	Eugene Olivier, Trevor M. Letcher, Paramespri Naidoo, Deresh Ramjugernath . Activity coefficients at infinite dilution of organic solutes in the ionic liquid 1-octyl-3-methylimidazolium hexafluorophosphate using gas–liquid chromatography at T = (313.15, 323.15, and 333.15) K. J. Chem. Thermodynamics, 2010, 42: 646–650
[C8MIm][PF6]	333.15	1.81	N.A	N.A	N.A	N.A	N.A	N.A	6.11	8.1	10.4	N.A	1.558	N.A	N.A	N.A	N.A	N.A	N.A	4.316	6.578	9.865	N.A	-0.139227	N.A	N.A	N.A	N.A	N.A	N.A	-0.293617	-0.187901	-0.0514423	N.A	Eugene Olivier, Trevor M. Letcher, Paramespri Naidoo, Deresh Ramjugernath . Activity coefficients at infinite dilution of organic solutes in the ionic liquid 1-octyl-3-methylimidazolium hexafluorophosphate using gas–liquid chromatography at T = (313.15, 323.15, and 333.15) K. J. Chem. Thermodynamics, 2010, 42: 646–650
[CH3CHOHCH2MIm][BF4]	303.15	2.45	4.76	8.54	N.A	N.A	N.A	N.A	N.A	N.A	N.A	0.85	2.22	4.076	7.659	N.A	N.A	N.A	N.A	N.A	N.A	N.A	0.8501	-0.0938776	-0.143697	-0.103162	N.A	N.A	N.A	N.A	N.A	N.A	N.A	0.000117647	Yi Li, Li-Sheng Wang and Ya Zhang. Activity Coefficients at Infinite Dilution of Polar Solutes in 1-(2-Hydroxyethyl)-3-methylimidazolium Tetrafluoroborate Using Gas-Liquid Chromatography. J. Chem. Eng. Data, 2010, 55 (4): 1732–1734
[CH3CHOHCH2MIm][BF4]	313.15	2.25	4.35	7.66	N.A	N.A	N.A	N.A	N.A	N.A	N.A	0.864	2.23	4.087	7.666	N.A	N.A	N.A	N.A	N.A	N.A	N.A	0.8522	-0.00888889	-0.0604598	0.00078329	N.A	N.A	N.A	N.A	N.A	N.A	N.A	-0.0136574	Yi Li, Li-Sheng Wang and Ya Zhang. Activity Coefficients at Infinite Dilution of Polar Solutes in 1-(2-Hydroxyethyl)-3-methylimidazolium Tetrafluoroborate Using Gas-Liquid Chromatography. J. Chem. Eng. Data, 2010, 55 (4): 1732–1734
[CH3CHOHCH2MIm][BF4]	323.15	2.09	4.04	8.91	N.A	N.A	N.A	N.A	N.A	N.A	N.A	0.878	2.239	4.097	7.669	N.A	N.A	N.A	N.A	N.A	N.A	N.A	0.8541	0.0712919	0.0141089	-0.139282	N.A	N.A	N.A	N.A	N.A	N.A	N.A	-0.027221	Yi Li, Li-Sheng Wang and Ya Zhang. Activity Coefficients at Infinite Dilution of Polar Solutes in 1-(2-Hydroxyethyl)-3-methylimidazolium Tetrafluoroborate Using Gas-Liquid Chromatography. J. Chem. Eng. Data, 2010, 55 (4): 1732–1734
[CH3CHOHCH2MIm][BF4]	333.15	1.97	3.7	6.19	N.A	N.A	N.A	N.A	N.A	N.A	N.A	0.892	2.247	4.106	7.671	N.A	N.A	N.A	N.A	N.A	N.A	N.A	0.8557	0.140609	0.10973	0.239257	N.A	N.A	N.A	N.A	N.A	N.A	N.A	-0.0406951	Yi Li, Li-Sheng Wang and Ya Zhang. Activity Coefficients at Infinite Dilution of Polar Solutes in 1-(2-Hydroxyethyl)-3-methylimidazolium Tetrafluoroborate Using Gas-Liquid Chromatography. J. Chem. Eng. Data, 2010, 55 (4): 1732–1734
[CH3CHOHCH2MIm][BF4]	343.15	1.88	3.49	5.72	N.A	N.A	N.A	N.A	N.A	N.A	N.A	0.906	2.254	4.112	7.669	N.A	N.A	N.A	N.A	N.A	N.A	N.A	0.8571	0.198936	0.178223	0.340734	N.A	N.A	N.A	N.A	N.A	N.A	N.A	-0.0539735	Yi Li, Li-Sheng Wang and Ya Zhang. Activity Coefficients at Infinite Dilution of Polar Solutes in 1-(2-Hydroxyethyl)-3-methylimidazolium Tetrafluoroborate Using Gas-Liquid Chromatography. J. Chem. Eng. Data, 2010, 55 (4): 1732–1734
[CH3CHOHCH2MIm][BF4]	353.15	1.79	3.27	5.3	N.A	N.A	N.A	N.A	N.A	N.A	N.A	0.917	2.26	4.118	7.666	N.A	N.A	N.A	N.A	N.A	N.A	N.A	0.8583	0.26257	0.259327	0.446415	N.A	N.A	N.A	N.A	N.A	N.A	N.A	-0.0640131	Yi Li, Li-Sheng Wang and Ya Zhang. Activity Coefficients at Infinite Dilution of Polar Solutes in 1-(2-Hydroxyethyl)-3-methylimidazolium Tetrafluoroborate Using Gas-Liquid Chromatography. J. Chem. Eng. Data, 2010, 55 (4): 1732–1734
[CH3CHOHCH2MIm][BF4]	363.15	1.71	3.09	4.83	N.A	N.A	N.A	N.A	N.A	N.A	N.A	0.932	2.266	4.122	7.661	N.A	N.A	N.A	N.A	N.A	N.A	N.A	0.8593	0.325146	0.333981	0.586128	N.A	N.A	N.A	N.A	N.A	N.A	N.A	-0.0780043	Yi Li, Li-Sheng Wang and Ya Zhang. Activity Coefficients at Infinite Dilution of Polar Solutes in 1-(2-Hydroxyethyl)-3-methylimidazolium Tetrafluoroborate Using Gas-Liquid Chromatography. J. Chem. Eng. Data, 2010, 55 (4): 1732–1734
[C4MIm][CF3SO3]	303.15	1.142	1.475	N.A	N.A	N.A	N.A	N.A	N.A	N.A	N.A	0.784	0.8522	1.174	N.A	N.A	N.A	N.A	N.A	N.A	N.A	N.A	0.7676	-0.253765	-0.204068	N.A	N.A	N.A	N.A	N.A	N.A	N.A	N.A	-0.0209184	Ming-Lan Ge and Li-Sheng Wang. Activity Coefficients at Infinite Dilution of Polar Solutes in 1-Butyl-3-methylimidazolium Trifluoromethanesulfonate Using Gas–Liquid Chromatography. J. Chem. Eng. Data, 2008, 53: 846–849
[C4MIm][CF3SO3]	313.15	1.085	1.401	1.854	N.A	N.A	N.A	N.A	N.A	N.A	N.A	0.771	0.8583	1.179	1.657	N.A	N.A	N.A	N.A	N.A	N.A	N.A	0.7581	-0.20894	-0.158458	-0.106257	N.A	N.A	N.A	N.A	N.A	N.A	N.A	-0.0167315	Ming-Lan Ge and Li-Sheng Wang. Activity Coefficients at Infinite Dilution of Polar Solutes in 1-Butyl-3-methylimidazolium Trifluoromethanesulfonate Using Gas–Liquid Chromatography. J. Chem. Eng. Data, 2008, 53: 846–849
[C4MIm][CF3SO3]	323.15	1.027	1.349	1.776	N.A	N.A	N.A	N.A	N.A	N.A	N.A	0.755	0.8639	1.183	1.658	N.A	N.A	N.A	N.A	N.A	N.A	N.A	0.7492	-0.158812	-0.123054	-0.0664414	N.A	N.A	N.A	N.A	N.A	N.A	N.A	-0.00768212	Ming-Lan Ge and Li-Sheng Wang. Activity Coefficients at Infinite Dilution of Polar Solutes in 1-Butyl-3-methylimidazolium Trifluoromethanesulfonate Using Gas–Liquid Chromatography. J. Chem. Eng. Data, 2008, 53: 846–849
[C4MIm][CF3SO3]	333.15	0.972	1.289	1.709	N.A	N.A	N.A	N.A	N.A	N.A	N.A	0.741	0.8689	1.187	1.659	N.A	N.A	N.A	N.A	N.A	N.A	N.A	0.7407	-0.10607	-0.0791311	-0.0292569	N.A	N.A	N.A	N.A	N.A	N.A	N.A	-0.000404858	Ming-Lan Ge and Li-Sheng Wang. Activity Coefficients at Infinite Dilution of Polar Solutes in 1-Butyl-3-methylimidazolium Trifluoromethanesulfonate Using Gas–Liquid Chromatography. J. Chem. Eng. Data, 2008, 53: 846–849
[C4MIm][CF3SO3]	343.15	0.954	1.234	1.234	N.A	N.A	N.A	N.A	N.A	N.A	N.A	0.73	0.8735	1.191	1.66	N.A	N.A	N.A	N.A	N.A	N.A	N.A	0.7327	-0.0843816	-0.034846	0.345219	N.A	N.A	N.A	N.A	N.A	N.A	N.A	0.00369863	Ming-Lan Ge and Li-Sheng Wang. Activity Coefficients at Infinite Dilution of Polar Solutes in 1-Butyl-3-methylimidazolium Trifluoromethanesulfonate Using Gas–Liquid Chromatography. J. Chem. Eng. Data, 2008, 53: 846–849
[C4MIm][CF3SO3]	353.15	0.926	1.181	1.51	N.A	N.A	N.A	N.A	N.A	N.A	N.A	0.717	0.8777	1.194	1.66	N.A	N.A	N.A	N.A	N.A	N.A	N.A	0.7251	-0.0521598	0.0110076	0.0993377	N.A	N.A	N.A	N.A	N.A	N.A	N.A	0.0112971	Ming-Lan Ge and Li-Sheng Wang. Activity Coefficients at Infinite Dilution of Polar Solutes in 1-Butyl-3-methylimidazolium Trifluoromethanesulfonate Using Gas–Liquid Chromatography. J. Chem. Eng. Data, 2008, 53: 846–849
[C4MIm][CF3SO3]	363.15	0.892	1.125	1.453	N.A	N.A	N.A	N.A	N.A	N.A	N.A	0.701	0.8816	1.197	1.66	N.A	N.A	N.A	N.A	N.A	N.A	N.A	0.7179	-0.0116592	0.064	0.142464	N.A	N.A	N.A	N.A	N.A	N.A	N.A	0.0241084	Ming-Lan Ge and Li-Sheng Wang. Activity Coefficients at Infinite Dilution of Polar Solutes in 1-Butyl-3-methylimidazolium Trifluoromethanesulfonate Using Gas–Liquid Chromatography. J. Chem. Eng. Data, 2008, 53: 846–849
[C20MIm][N(CN)2]	358.15	0.399	0.404	0.422	1.68	2.51	1.86	1.64	2.51	2.93	3.44	0.795	0.3513	0.3757	0.4106	1.282	1.615	1.599	0.9172	1.355	1.755	2.235	0.6409	-0.119549	-0.0700495	-0.0270142	-0.236905	-0.356574	-0.140323	-0.440732	-0.460159	-0.401024	-0.350291	-0.193836	Michał Wlazło, Maciej Zawadzki, Urszula Domańska. Separation of water/butan-1-ol based on activity coefficients at infinite dilution in 1,3-didecyl-2-methylimidazolium dicyanamide ionic liquid. J. Chem. Thermodynamics, 2018, 116: 316–322
[C20MIm][N(CN)2]	368.15	0.406	0.415	0.434	1.75	2.58	1.93	1.69	2.58	3.02	3.53	0.799	0.3628	0.3891	0.4262	1.284	1.621	1.603	0.9191	1.355	1.755	2.235	0.6177	-0.106404	-0.0624096	-0.0179724	-0.266286	-0.371705	-0.16943	-0.456154	-0.474806	-0.418874	-0.366856	-0.226909	Michał Wlazło, Maciej Zawadzki, Urszula Domańska. Separation of water/butan-1-ol based on activity coefficients at infinite dilution in 1,3-didecyl-2-methylimidazolium dicyanamide ionic liquid. J. Chem. Thermodynamics, 2018, 116: 316–322
[C20MIm][N(CN)2]	378.15	0.413	0.425	0.446	1.81	2.65	2	1.74	2.63	3.11	3.62	0.802	0.3738	0.402	0.4414	1.287	1.626	1.608	0.9209	1.355	1.755	2.235	0.596	-0.0949153	-0.0541176	-0.0103139	-0.28895	-0.386415	-0.196	-0.470747	-0.484791	-0.435691	-0.382597	-0.256858	Michał Wlazło, Maciej Zawadzki, Urszula Domańska. Separation of water/butan-1-ol based on activity coefficients at infinite dilution in 1,3-didecyl-2-methylimidazolium dicyanamide ionic liquid. J. Chem. Thermodynamics, 2018, 116: 316–322
[C20MIm][N(CN)2]	388.15	0.419	0.436	0.458	1.87	2.71	2.07	1.78	2.69	3.19	3.71	0.806	0.3841	0.4143	0.4559	1.289	1.631	1.612	0.9226	1.355	1.755	2.235	0.5757	-0.0832936	-0.0497706	-0.00458515	-0.310695	-0.398155	-0.221256	-0.481685	-0.496283	-0.449843	-0.397574	-0.285732	Michał Wlazło, Maciej Zawadzki, Urszula Domańska. Separation of water/butan-1-ol based on activity coefficients at infinite dilution in 1,3-didecyl-2-methylimidazolium dicyanamide ionic liquid. J. Chem. Thermodynamics, 2018, 116: 316–322
[C20MIm][N(CN)2]	398.15	0.426	0.446	0.47	1.93	2.77	2.13	1.83	2.74	3.28	3.79	0.808	0.394	0.426	0.47	1.291	1.636	1.616	0.9243	1.355	1.755	2.235	0.5566	-0.0751174	-0.044843	0	-0.331088	-0.409386	-0.241315	-0.494918	-0.505474	-0.464939	-0.41029	-0.311139	Michał Wlazło, Maciej Zawadzki, Urszula Domańska. Separation of water/butan-1-ol based on activity coefficients at infinite dilution in 1,3-didecyl-2-methylimidazolium dicyanamide ionic liquid. J. Chem. Thermodynamics, 2018, 116: 316–322
[C20MIm][N(CN)2]	408.15	0.432	0.456	0.481	1.99	2.84	2.2	1.88	2.79	3.36	3.87	0.812	0.4032	0.4372	0.4835	1.293	1.64	1.619	0.9258	1.355	1.754	2.235	0.5387	-0.0666667	-0.0412281	0.00519751	-0.350251	-0.422535	-0.264091	-0.507553	-0.514337	-0.477976	-0.422481	-0.336576	Michał Wlazło, Maciej Zawadzki, Urszula Domańska. Separation of water/butan-1-ol based on activity coefficients at infinite dilution in 1,3-didecyl-2-methylimidazolium dicyanamide ionic liquid. J. Chem. Thermodynamics, 2018, 116: 316–322
[C3MPip][NTf2]	308.15	2.02	2.47	N.A	2.9	N.A	N.A	2.92	10.3	13.7	18.7	N.A	1.497	2.006	N.A	2.428	N.A	N.A	1.957	6.913	11.37	18.39	N.A	-0.258911	-0.187854	N.A	-0.162759	N.A	N.A	-0.329795	-0.328835	-0.170073	-0.0165775	N.A	Urszula Domańska, Kamil Paduszyński. Measurements of activity coefficients at infinite dilution of organic solutes and water in 1-propyl-1-methylpiperidinium bis{(trifluoromethyl)sulfonyl}imide ionic liquid using g.l.c. J. Chem. Thermodynamics, 2010, 42: 1361–1366
[C3MPip][NTf2]	318.15	1.86	2.28	2.94	2.88	N.A	N.A	2.77	9.28	12.7	17.5	N.A	1.452	1.939	2.647	2.462	N.A	N.A	1.968	6.673	10.9	17.51	N.A	-0.219355	-0.149561	-0.0996599	-0.145139	N.A	N.A	-0.289531	-0.280927	-0.141732	0.000571429	N.A	Urszula Domańska, Kamil Paduszyński. Measurements of activity coefficients at infinite dilution of organic solutes and water in 1-propyl-1-methylpiperidinium bis{(trifluoromethyl)sulfonyl}imide ionic liquid using g.l.c. J. Chem. Thermodynamics, 2010, 42: 1361–1366
[C3MPip][NTf2]	328.15	1.69	2.04	2.56	2.87	N.A	N.A	2.79	9.03	12.2	16.3	N.A	1.411	1.876	2.551	2.49	N.A	N.A	1.976	6.45	10.46	16.7	N.A	-0.165089	-0.0803922	-0.00351562	-0.132404	N.A	N.A	-0.291756	-0.285714	-0.142623	0.0245399	N.A	Urszula Domańska, Kamil Paduszyński. Measurements of activity coefficients at infinite dilution of organic solutes and water in 1-propyl-1-methylpiperidinium bis{(trifluoromethyl)sulfonyl}imide ionic liquid using g.l.c. J. Chem. Thermodynamics, 2010, 42: 1361–1366
[C3MPip][NTf2]	338.15	1.55	1.86	2.31	2.86	N.A	N.A	2.76	8.51	11.6	15.7	N.A	1.373	1.818	2.462	2.514	N.A	N.A	1.982	6.24	10.06	15.95	N.A	-0.114194	-0.0225806	0.0658009	-0.120979	N.A	N.A	-0.281884	-0.266745	-0.132759	0.0159236	N.A	Urszula Domańska, Kamil Paduszyński. Measurements of activity coefficients at infinite dilution of organic solutes and water in 1-propyl-1-methylpiperidinium bis{(trifluoromethyl)sulfonyl}imide ionic liquid using g.l.c. J. Chem. Thermodynamics, 2010, 42: 1361–1366
[C3MPip][NTf2]	348.15	1.43	1.71	2.12	2.85	N.A	N.A	2.69	7.99	10.9	14.8	N.A	1.338	1.765	2.38	2.534	N.A	N.A	1.985	6.044	9.679	15.25	N.A	-0.0643357	0.0321637	0.122642	-0.110877	N.A	N.A	-0.262082	-0.243554	-0.112018	0.0304054	N.A	Urszula Domańska, Kamil Paduszyński. Measurements of activity coefficients at infinite dilution of organic solutes and water in 1-propyl-1-methylpiperidinium bis{(trifluoromethyl)sulfonyl}imide ionic liquid using g.l.c. J. Chem. Thermodynamics, 2010, 42: 1361–1366
[C3MPip][NTf2]	358.15	1.32	1.59	1.96	2.84	N.A	N.A	2.73	7.86	10.6	14.2	N.A	1.305	1.716	2.305	2.55	N.A	N.A	1.987	5.86	9.327	14.61	N.A	-0.0113636	0.0792453	0.17602	-0.102113	N.A	N.A	-0.272161	-0.254453	-0.120094	0.0288732	N.A	Urszula Domańska, Kamil Paduszyński. Measurements of activity coefficients at infinite dilution of organic solutes and water in 1-propyl-1-methylpiperidinium bis{(trifluoromethyl)sulfonyl}imide ionic liquid using g.l.c. J. Chem. Thermodynamics, 2010, 42: 1361–1366
[C4MPyr][FAP]	318.15	2.89	3.54	4.48	1.35	3.1	N.A	1.43	5.4	7.57	10.7	0.327	2.103	2.768	3.727	0.6883	1.979	N.A	0.7232	3.24	5.218	8.269	0.2727	-0.272318	-0.218079	-0.16808	-0.490148	-0.361613	N.A	-0.494266	-0.4	-0.3107	-0.227196	-0.166055	Urszula Domańska, Elena Vadimovna Lukoshko, Marek Królikowski. Measurements of activity coefficients at infinite dilution for organic solutes and water in the ionic liquid 1-butyl-1-methylpyrrolidinium tris(pentafluoroethyl)trifluorophosphate ([BMPYR][FAP]). Chemical Engineering Journal, 2012, 183: 261– 270
[C4MPyr][FAP]	328.15	2.53	3.06	3.83	1.39	3.08	N.A	1.44	5.18	7.24	10.1	0.327	2.067	2.712	3.639	0.7257	2.027	N.A	0.7486	3.287	5.263	8.293	0.2868	-0.183004	-0.113725	-0.0498695	-0.477914	-0.341883	N.A	-0.480139	-0.365444	-0.273066	-0.178911	-0.122936	Urszula Domańska, Elena Vadimovna Lukoshko, Marek Królikowski. Measurements of activity coefficients at infinite dilution for organic solutes and water in the ionic liquid 1-butyl-1-methylpyrrolidinium tris(pentafluoroethyl)trifluorophosphate ([BMPYR][FAP]). Chemical Engineering Journal, 2012, 183: 261– 270
[C4MPyr][FAP]	338.15	2.24	2.7	3.34	1.42	3.06	N.A	1.46	4.99	6.93	9.61	0.331	2.029	2.654	3.551	0.7619	2.07	N.A	0.7726	3.32	5.287	8.285	0.3005	-0.0941964	-0.017037	0.0631737	-0.463451	-0.323529	N.A	-0.470822	-0.334669	-0.237085	-0.137877	-0.092145	Urszula Domańska, Elena Vadimovna Lukoshko, Marek Królikowski. Measurements of activity coefficients at infinite dilution for organic solutes and water in the ionic liquid 1-butyl-1-methylpyrrolidinium tris(pentafluoroethyl)trifluorophosphate ([BMPYR][FAP]). Chemical Engineering Journal, 2012, 183: 261– 270
[C4MPyr][FAP]	348.15	1.99	2.38	2.93	1.45	3.07	N.A	1.47	4.84	6.7	9.2	0.331	1.99	2.597	3.463	0.7968	2.109	N.A	0.7952	3.343	5.294	8.251	0.3139	0	0.0911765	0.181911	-0.450483	-0.313029	N.A	-0.459048	-0.309298	-0.209851	-0.103152	-0.0516616	Urszula Domańska, Elena Vadimovna Lukoshko, Marek Królikowski. Measurements of activity coefficients at infinite dilution for organic solutes and water in the ionic liquid 1-butyl-1-methylpyrrolidinium tris(pentafluoroethyl)trifluorophosphate ([BMPYR][FAP]). Chemical Engineering Journal, 2012, 183: 261– 270
[C4MPyr][FAP]	358.15	1.79	2.15	2.61	1.49	3.05	N.A	1.49	4.69	6.46	8.79	0.334	1.951	2.539	3.376	0.8304	2.144	N.A	0.8165	3.356	5.286	8.194	0.327	0.0899441	0.18093	0.293487	-0.442685	-0.297049	N.A	-0.452013	-0.284435	-0.181734	-0.0678043	-0.0209581	Urszula Domańska, Elena Vadimovna Lukoshko, Marek Królikowski. Measurements of activity coefficients at infinite dilution for organic solutes and water in the ionic liquid 1-butyl-1-methylpyrrolidinium tris(pentafluoroethyl)trifluorophosphate ([BMPYR][FAP]). Chemical Engineering Journal, 2012, 183: 261– 270
[C4MPyr][FAP]	368.15	1.61	1.94	2.34	1.51	3.02	N.A	1.5	4.35	6.23	8.4	0.337	1.912	2.482	3.291	0.8627	2.175	N.A	0.8364	3.36	5.265	8.119	0.3397	0.187578	0.279381	0.40641	-0.428675	-0.279801	N.A	-0.4424	-0.227586	-0.154896	-0.0334524	0.00801187	Urszula Domańska, Elena Vadimovna Lukoshko, Marek Królikowski. Measurements of activity coefficients at infinite dilution for organic solutes and water in the ionic liquid 1-butyl-1-methylpyrrolidinium tris(pentafluoroethyl)trifluorophosphate ([BMPYR][FAP]). Chemical Engineering Journal, 2012, 183: 261– 270
[C6MIm][BF4]	303	N.A	N.A	N.A	N.A	N.A	N.A	N.A	N.A	N.A	N.A	N.A	N.A	N.A	N.A	N.A	N.A	N.A	N.A	N.A	N.A	N.A	N.A	N.A	N.A	N.A	N.A	N.A	N.A	N.A	N.A	N.A	N.A	N.A	Gloria M. Foco, Susana B. Bottini,, Nathalie Quezada, Juan C. de la Fuente, and Cor J. Peters. Activity Coefficients at Infinite Dilution in 1-Alkyl-3-methylimidazolium Tetrafluoroborate Ionic Liquids. J. Chem. Eng. Data, 2006, 51: 1088-1091
[C6MIm][BF4]	323	1.47	1.86	N.A	N.A	N.A	N.A	N.A	14.78	N.A	N.A	N.A	1.143	1.407	N.A	N.A	N.A	N.A	N.A	8.2	N.A	N.A	N.A	-0.222449	-0.243548	N.A	N.A	N.A	N.A	N.A	-0.445196	N.A	N.A	N.A	Gloria M. Foco, Susana B. Bottini,, Nathalie Quezada, Juan C. de la Fuente, and Cor J. Peters. Activity Coefficients at Infinite Dilution in 1-Alkyl-3-methylimidazolium Tetrafluoroborate Ionic Liquids. J. Chem. Eng. Data, 2006, 51: 1088-1091
[C6MIm][BF4]	343	N.A	N.A	N.A	N.A	N.A	N.A	2.53	N.A	N.A	N.A	N.A	N.A	N.A	N.A	N.A	N.A	N.A	3.167	N.A	N.A	N.A	N.A	N.A	N.A	N.A	N.A	N.A	N.A	0.251779	N.A	N.A	N.A	N.A	Gloria M. Foco, Susana B. Bottini,, Nathalie Quezada, Juan C. de la Fuente, and Cor J. Peters. Activity Coefficients at Infinite Dilution in 1-Alkyl-3-methylimidazolium Tetrafluoroborate Ionic Liquids. J. Chem. Eng. Data, 2006, 51: 1088-1091
[CH3OC2Mmor][NTf2]	318.15	1.77	2.39	3.31	3.53	9.5	5.55	3.49	16.5	24.9	38.6	0.423	1.648	2.547	4.027	4.562	13.11	8.27	3.431	15.06	28.47	52.98	0.4202	-0.0689266	0.0656904	0.216616	0.292351	0.38	0.49009	-0.0169054	-0.0872727	0.143373	0.372539	-0.00661939	Andrzej Marciniak, Michał Wlazło. Activity coefficients at infinite dilution and physicochemical properties for organic solutes and water in the ionic liquid 4-(2-methoxyethyl)- 4-methylmorpholinium bis(trifluoromethylsulfonyl)-amide. J. Chem. Thermodynamics, 2012, 47: 382–388
[CH3OC2Mmor][NTf2]	328.15	1.61	2.14	2.94	3.55	9.21	5.5	3.46	15.3	23	34.9	0.426	1.6	2.464	3.882	4.647	13.1	8.385	3.464	14.47	27.19	50.3	0.426	-0.00621118	0.151402	0.320408	0.309014	0.422367	0.524545	0.00115607	-0.0542484	0.182174	0.441261	0	Andrzej Marciniak, Michał Wlazło. Activity coefficients at infinite dilution and physicochemical properties for organic solutes and water in the ionic liquid 4-(2-methoxyethyl)- 4-methylmorpholinium bis(trifluoromethylsulfonyl)-amide. J. Chem. Thermodynamics, 2012, 47: 382–388
[CH3OC2Mmor][NTf2]	338.15	1.49	1.96	2.66	3.57	8.97	5.43	3.44	14.3	21.7	32.5	0.428	1.555	2.388	3.75	4.723	13.06	8.483	3.493	13.91	26	47.81	0.4312	0.0436242	0.218367	0.409774	0.322969	0.455964	0.562247	0.015407	-0.0272727	0.198157	0.471077	0.00747664	Andrzej Marciniak, Michał Wlazło. Activity coefficients at infinite dilution and physicochemical properties for organic solutes and water in the ionic liquid 4-(2-methoxyethyl)- 4-methylmorpholinium bis(trifluoromethylsulfonyl)-amide. J. Chem. Thermodynamics, 2012, 47: 382–388
[CH3OC2Mmor][NTf2]	348.15	1.36	1.79	2.4	3.58	8.75	5.37	3.41	13.6	20.3	30.1	0.431	1.514	2.319	3.628	4.79	13.01	8.564	3.516	13.39	24.88	45.5	0.436	0.113235	0.295531	0.511667	0.337989	0.486857	0.594786	0.031085	-0.0154412	0.225616	0.511628	0.0116009	Andrzej Marciniak, Michał Wlazło. Activity coefficients at infinite dilution and physicochemical properties for organic solutes and water in the ionic liquid 4-(2-methoxyethyl)- 4-methylmorpholinium bis(trifluoromethylsulfonyl)-amide. J. Chem. Thermodynamics, 2012, 47: 382–388
[CH3OC2Mmor][NTf2]	358.15	1.26	1.63	2.18	3.59	8.49	5.32	3.39	12.9	19	27.5	0.433	1.476	2.254	3.516	4.849	12.94	8.631	3.535	12.9	23.84	43.35	0.4403	0.171429	0.382822	0.612844	0.350696	0.524146	0.622368	0.0427729	0	0.254737	0.576364	0.0168591	Andrzej Marciniak, Michał Wlazło. Activity coefficients at infinite dilution and physicochemical properties for organic solutes and water in the ionic liquid 4-(2-methoxyethyl)- 4-methylmorpholinium bis(trifluoromethylsulfonyl)-amide. J. Chem. Thermodynamics, 2012, 47: 382–388
[CH3OC2Mmor][NTf2]	368.15	1.17	1.52	2.02	3.6	8.3	5.28	3.37	12.1	18.1	25.9	0.436	1.441	2.194	3.412	4.901	12.86	8.683	3.549	12.44	22.87	41.35	0.4442	0.231624	0.443421	0.689109	0.361389	0.549398	0.644508	0.0531157	0.0280992	0.263536	0.596525	0.0188073	Andrzej Marciniak, Michał Wlazło. Activity coefficients at infinite dilution and physicochemical properties for organic solutes and water in the ionic liquid 4-(2-methoxyethyl)- 4-methylmorpholinium bis(trifluoromethylsulfonyl)-amide. J. Chem. Thermodynamics, 2012, 47: 382–388
[HOCH2C2Py][FAP]	308.15	0.948	1.33	1.9	0.672	N.A	N.A	0.733	14.8	22.6	34.9	N.A	0.8167	1.102	1.523	0.7977	N.A	N.A	0.8342	8.469	14.02	22.85	N.A	-0.138502	-0.171429	-0.198421	0.187054	N.A	N.A	0.138063	-0.42777	-0.379646	-0.345272	N.A	Andrzej Marciniak and Michał Wlazło. Activity Coefficients at Infinite Dilution Measurements for Organic Solutes and Water in the Ionic Liquid 1-(3-Hydroxypropyl)pyridinium Trifluorotris(perfluoroethyl)phosphate. J. Phys. Chem. B, 2010, 114: 6990–6994
[HOCH2C2Py][FAP]	318.15	0.912	1.27	1.78	0.742	N.A	N.A	0.797	13.6	20.7	31.2	N.A	0.8387	1.128	1.551	0.8323	N.A	N.A	0.8566	8.276	13.61	22.04	N.A	-0.0803728	-0.111811	-0.128652	0.121698	N.A	N.A	0.0747804	-0.391471	-0.342512	-0.29359	N.A	Andrzej Marciniak and Michał Wlazło. Activity Coefficients at Infinite Dilution Measurements for Organic Solutes and Water in the Ionic Liquid 1-(3-Hydroxypropyl)pyridinium Trifluorotris(perfluoroethyl)phosphate. J. Phys. Chem. B, 2010, 114: 6990–6994
[HOCH2C2Py][FAP]	328.15	0.882	1.21	1.68	0.815	N.A	N.A	0.869	12.6	19	28.5	N.A	0.8585	1.15	1.576	0.8654	N.A	N.A	0.8775	8.075	13.2	21.24	N.A	-0.026644	-0.0495868	-0.0619048	0.0618405	N.A	N.A	0.00978136	-0.359127	-0.305263	-0.254737	N.A	Andrzej Marciniak and Michał Wlazło. Activity Coefficients at Infinite Dilution Measurements for Organic Solutes and Water in the Ionic Liquid 1-(3-Hydroxypropyl)pyridinium Trifluorotris(perfluoroethyl)phosphate. J. Phys. Chem. B, 2010, 114: 6990–6994
[HOCH2C2Py][FAP]	338.15	0.854	1.17	1.59	0.898	N.A	N.A	0.936	11.7	17.6	25.9	N.A	0.8762	1.17	1.597	0.897	N.A	N.A	0.897	7.869	12.78	20.44	N.A	0.0259953	0	0.00440252	-0.00111359	N.A	N.A	-0.0416667	-0.327436	-0.273864	-0.210811	N.A	Andrzej Marciniak and Michał Wlazło. Activity Coefficients at Infinite Dilution Measurements for Organic Solutes and Water in the Ionic Liquid 1-(3-Hydroxypropyl)pyridinium Trifluorotris(perfluoroethyl)phosphate. J. Phys. Chem. B, 2010, 114: 6990–6994
[HOCH2C2Py][FAP]	348.15	0.83	1.12	1.51	0.972	N.A	N.A	1	10.9	16.3	23.6	N.A	0.892	1.187	1.614	0.9273	N.A	N.A	0.9151	7.662	12.37	19.66	N.A	0.0746988	0.0598214	0.0688742	-0.0459877	N.A	N.A	-0.0849	-0.297064	-0.241104	-0.166949	N.A	Andrzej Marciniak and Michał Wlazło. Activity Coefficients at Infinite Dilution Measurements for Organic Solutes and Water in the Ionic Liquid 1-(3-Hydroxypropyl)pyridinium Trifluorotris(perfluoroethyl)phosphate. J. Phys. Chem. B, 2010, 114: 6990–6994
[HOCH2C2Py][FAP]	358.15	0.808	1.08	1.44	1.06	N.A	N.A	1.07	10.2	15.1	21.7	N.A	0.906	1.202	1.628	0.9563	N.A	N.A	0.9321	7.454	11.97	18.9	N.A	0.121287	0.112963	0.130556	-0.0978302	N.A	N.A	-0.128879	-0.269216	-0.207285	-0.129032	N.A	Andrzej Marciniak and Michał Wlazło. Activity Coefficients at Infinite Dilution Measurements for Organic Solutes and Water in the Ionic Liquid 1-(3-Hydroxypropyl)pyridinium Trifluorotris(perfluoroethyl)phosphate. J. Phys. Chem. B, 2010, 114: 6990–6994
[C2C1MIm][NTf2]	298	2.29998	3.13993	4.47005	2.97011	N.A	4.82978	N.A	N.A	N.A	N.A	0.459002	1.531	1.965	2.581	2.692	N.A	4.062	N.A	N.A	N.A	N.A	0.4569	-0.334342	-0.37419	-0.422602	-0.0936372	N.A	-0.158967	N.A	N.A	N.A	N.A	-0.00458021	David M. Eike, Joan F. Brennecke, and Edward J. Maginn. Predicting Infinite-Dilution Activity Coefficients of Organic Solutes in Ionic Liquids. Ind. Eng. Chem. Res, 2004, 43 (4): 1039-1048
[N1,1,1,4][NTf2]	298	2.29	2.91	3.85	N.A	N.A	N.A	N.A	10.6	16.6	24.87	0.52	3.352	4.573	6.387	N.A	N.A	N.A	N.A	9.342	15.68	25.89	0.52	0.463755	0.571478	0.658961	N.A	N.A	N.A	N.A	-0.118679	-0.0554217	0.0410133	0	Andreas Heintz, Tatiana V. Vasiltsova, Javid Safaro, Eckard Bich, and Sergey P. Verevkin. Thermodynamic Properties of Mixtures Containing Ionic Liquids. 9. Activity Coefficients at Infinite Dilution of Hydrocarbons, Alcohols, Esters, and Aldehydes in Trimethyl-butylammonium Bis(trifluoromethylsulfonyl) Imide Using Gas-Liquid Chromatography and Static Method. J. Chem. Eng. Data, 2006, 51: 648-655
[C2MIm][FAP]	318.15	2.64	3.4	4.49	1.38	3.13	2.12	1.48	7.91	11.6	17.4	0.308	2.097	2.821	3.884	1.363	3.698	2.152	1.256	6.517	10.73	17.38	0.2845	-0.205682	-0.170294	-0.134967	-0.0123188	0.18147	0.0150943	-0.151351	-0.176106	-0.075	-0.00114943	-0.0762987	Michał Wlazło, Andrzej Marciniak, Trevor M. Letcher. Activity Coefficients at Infinite Dilution and Physicochemical Properties for Organic Solutes and Water in the Ionic Liquid 1-Ethyl-3-methylimidazolium trifluorotris(perfluoroethyl)phosphate. J Solution Chem, 2015, 44: 413–430
[C2MIm][FAP]	328.15	2.43	3.11	4.05	1.49	3.26	2.25	1.56	7.76	11.3	16.7	0.325	2.116	2.84	3.899	1.426	3.772	2.241	1.293	6.564	10.75	17.33	0.2998	-0.129218	-0.0868167	-0.037284	-0.042953	0.157055	-0.004	-0.171154	-0.154124	-0.0486726	0.0377246	-0.0775385	Michał Wlazło, Andrzej Marciniak, Trevor M. Letcher. Activity Coefficients at Infinite Dilution and Physicochemical Properties for Organic Solutes and Water in the Ionic Liquid 1-Ethyl-3-methylimidazolium trifluorotris(perfluoroethyl)phosphate. J Solution Chem, 2015, 44: 413–430
[C2MIm][FAP]	338.15	2.24	2.85	3.68	1.59	3.39	2.37	1.64	7.61	11.1	16.1	0.34	2.128	2.85	3.902	1.486	3.839	2.327	1.328	6.586	10.73	17.21	0.3148	-0.05	0	0.0603261	-0.0654088	0.132448	-0.0181435	-0.190244	-0.13456	-0.0333333	0.0689441	-0.0741176	Michał Wlazło, Andrzej Marciniak, Trevor M. Letcher. Activity Coefficients at Infinite Dilution and Physicochemical Properties for Organic Solutes and Water in the Ionic Liquid 1-Ethyl-3-methylimidazolium trifluorotris(perfluoroethyl)phosphate. J Solution Chem, 2015, 44: 413–430
[C2MIm][FAP]	348.15	2.09	2.63	3.36	1.69	3.52	2.5	1.73	7.48	10.8	15.5	0.357	2.135	2.853	3.896	1.543	3.899	2.408	1.36	6.586	10.68	17.05	0.3295	0.0215311	0.0847909	0.159524	-0.0869822	0.10767	-0.0368	-0.213873	-0.119519	-0.0111111	0.1	-0.0770308	Michał Wlazło, Andrzej Marciniak, Trevor M. Letcher. Activity Coefficients at Infinite Dilution and Physicochemical Properties for Organic Solutes and Water in the Ionic Liquid 1-Ethyl-3-methylimidazolium trifluorotris(perfluoroethyl)phosphate. J Solution Chem, 2015, 44: 413–430
[C2MIm][FAP]	358.15	1.94	2.44	3.09	1.8	3.65	2.62	1.81	7.36	10.6	15	0.373	2.137	2.85	3.883	1.598	3.952	2.485	1.391	6.567	10.6	16.84	0.3439	0.101546	0.168033	0.256634	-0.112222	0.0827397	-0.0515267	-0.231492	-0.107745	0	0.122667	-0.0780161	Michał Wlazło, Andrzej Marciniak, Trevor M. Letcher. Activity Coefficients at Infinite Dilution and Physicochemical Properties for Organic Solutes and Water in the Ionic Liquid 1-Ethyl-3-methylimidazolium trifluorotris(perfluoroethyl)phosphate. J Solution Chem, 2015, 44: 413–430
[C2MIm][FAP]	368.15	1.82	2.27	2.85	1.91	3.78	2.74	1.89	7.25	10.4	14.6	0.389	2.134	2.841	3.862	1.651	4	2.558	1.42	6.534	10.5	16.6	0.358	0.172527	0.251542	0.355088	-0.135602	0.0582011	-0.0664234	-0.248677	-0.0987586	0.00961538	0.136986	-0.0796915	Michał Wlazło, Andrzej Marciniak, Trevor M. Letcher. Activity Coefficients at Infinite Dilution and Physicochemical Properties for Organic Solutes and Water in the Ionic Liquid 1-Ethyl-3-methylimidazolium trifluorotris(perfluoroethyl)phosphate. J Solution Chem, 2015, 44: 413–430
[HOCH2CH2Mmor][NTf2]	318.15	1.4	2.06	3.23	4.94	16.1	8.7	4.94	58.2	86.6	133	0.479	1.16	1.789	2.824	4.026	11.65	7.286	3.085	16.17	30.52	56.69	0.3808	-0.171429	-0.131553	-0.125697	-0.18502	-0.276398	-0.162529	-0.375506	-0.722165	-0.647575	-0.573759	-0.20501	Michał Wlazło, Andrzej Marciniak, Maciej Zawadzki, Barbara Dudkiewicz. Activity coefficients at infinite dilution and physicochemical properties for organic solutes and water in the ionic liquid 4-(3-hydroxypropyl)-4- methylmorpholinium bis(trifluoromethylsulfonyl)-amide. J. Chem. Thermodynamics, 2015, 86: 154–161
[HOCH2CH2Mmor][NTf2]	328.15	1.37	2.01	3.07	5.07	15.8	8.75	5	51.7	75.8	117	0.495	1.144	1.761	2.773	4.121	11.71	7.431	3.129	15.57	29.24	54.06	0.3877	-0.164964	-0.123881	-0.0967427	-0.187179	-0.258861	-0.150743	-0.3742	-0.698839	-0.614248	-0.537949	-0.216768	Michał Wlazło, Andrzej Marciniak, Maciej Zawadzki, Barbara Dudkiewicz. Activity coefficients at infinite dilution and physicochemical properties for organic solutes and water in the ionic liquid 4-(3-hydroxypropyl)-4- methylmorpholinium bis(trifluoromethylsulfonyl)-amide. J. Chem. Thermodynamics, 2015, 86: 154–161
[HOCH2CH2Mmor][NTf2]	338.15	1.34	1.96	2.96	5.22	15.6	8.8	5.05	45.2	69.3	106	0.513	1.13	1.735	2.725	4.209	11.75	7.561	3.167	15.01	28.06	51.61	0.3941	-0.156716	-0.114796	-0.0793919	-0.193678	-0.246795	-0.140795	-0.372871	-0.66792	-0.595094	-0.513113	-0.231774	Michał Wlazło, Andrzej Marciniak, Maciej Zawadzki, Barbara Dudkiewicz. Activity coefficients at infinite dilution and physicochemical properties for organic solutes and water in the ionic liquid 4-(3-hydroxypropyl)-4- methylmorpholinium bis(trifluoromethylsulfonyl)-amide. J. Chem. Thermodynamics, 2015, 86: 154–161
[HOCH2CH2Mmor][NTf2]	348.15	1.3	1.92	2.84	5.35	15.2	8.86	5.1	40.5	62.2	94.6	0.528	1.116	1.711	2.68	4.289	11.77	7.676	3.201	14.49	26.94	49.32	0.4	-0.141538	-0.108854	-0.056338	-0.198318	-0.225658	-0.133634	-0.372353	-0.642222	-0.566881	-0.478647	-0.242424	Michał Wlazło, Andrzej Marciniak, Maciej Zawadzki, Barbara Dudkiewicz. Activity coefficients at infinite dilution and physicochemical properties for organic solutes and water in the ionic liquid 4-(3-hydroxypropyl)-4- methylmorpholinium bis(trifluoromethylsulfonyl)-amide. J. Chem. Thermodynamics, 2015, 86: 154–161
[HOCH2CH2Mmor][NTf2]	358.15	1.28	1.88	2.73	5.45	15	8.89	5.14	35.9	55.7	85.2	0.545	1.103	1.687	2.637	4.361	11.78	7.777	3.231	13.99	25.9	47.19	0.4055	-0.138281	-0.10266	-0.0340659	-0.199817	-0.214667	-0.125197	-0.371401	-0.610306	-0.535009	-0.446127	-0.255963	Michał Wlazło, Andrzej Marciniak, Maciej Zawadzki, Barbara Dudkiewicz. Activity coefficients at infinite dilution and physicochemical properties for organic solutes and water in the ionic liquid 4-(3-hydroxypropyl)-4- methylmorpholinium bis(trifluoromethylsulfonyl)-amide. J. Chem. Thermodynamics, 2015, 86: 154–161
[HOCH2CH2Mmor][NTf2]	368.15	1.25	1.84	2.64	5.58	14.8	8.93	5.19	N.A	51.1	77.2	0.561	1.091	1.665	2.596	4.427	11.77	7.865	3.256	N.A	24.92	45.19	0.4106	-0.1272	-0.0951087	-0.0166667	-0.206631	-0.20473	-0.119261	-0.37264	N.A	-0.512329	-0.414637	-0.268093	Michał Wlazło, Andrzej Marciniak, Maciej Zawadzki, Barbara Dudkiewicz. Activity coefficients at infinite dilution and physicochemical properties for organic solutes and water in the ionic liquid 4-(3-hydroxypropyl)-4- methylmorpholinium bis(trifluoromethylsulfonyl)-amide. J. Chem. Thermodynamics, 2015, 86: 154–161
[C4MPy][NTf2]	298.15	1.91	2.28	N.A	1.97	N.A	N.A	2.07	7.4	9.97	13.8	N.A	1.258	1.621	N.A	1.956	N.A	N.A	1.628	6.189	9.807	15.3	N.A	-0.341361	-0.289035	N.A	-0.0071066	N.A	N.A	-0.213527	-0.163649	-0.016349	0.108696	N.A	Urszula Domańska, Andrzej Marciniak. Activity coefficients at infinite dilution measurements for organic solutes and water in the ionic liquid 4-methyl-N-butyl-pyridinium bis(trifluoromethylsulfonyl)-imide. J. Chem. Thermodynamics, 2009, 41: 1350–1355
[C4MPy][NTf2]	308.15	1.72	2.04	N.A	2	N.A	N.A	2.08	7.11	9.56	13	N.A	1.236	1.589	N.A	2	N.A	N.A	1.649	5.992	9.446	14.66	N.A	-0.281395	-0.221078	N.A	0	N.A	N.A	-0.207212	-0.157243	-0.0119247	0.127692	N.A	Urszula Domańska, Andrzej Marciniak. Activity coefficients at infinite dilution measurements for organic solutes and water in the ionic liquid 4-methyl-N-butyl-pyridinium bis(trifluoromethylsulfonyl)-imide. J. Chem. Thermodynamics, 2009, 41: 1350–1355
[C4MPy][NTf2]	318.15	1.56	1.84	2.26	2.03	N.A	N.A	2.08	6.82	9.17	12.4	N.A	1.215	1.558	2.043	2.039	N.A	N.A	1.667	5.809	9.112	14.07	N.A	-0.221154	-0.153261	-0.0960177	0.0044335	N.A	N.A	-0.198558	-0.14824	-0.00632497	0.134677	N.A	Urszula Domańska, Andrzej Marciniak. Activity coefficients at infinite dilution measurements for organic solutes and water in the ionic liquid 4-methyl-N-butyl-pyridinium bis(trifluoromethylsulfonyl)-imide. J. Chem. Thermodynamics, 2009, 41: 1350–1355
[C4MPy][NTf2]	328.15	1.43	1.67	2.05	2.06	N.A	N.A	2.08	6.58	8.82	11.8	N.A	1.195	1.529	2	2.075	N.A	N.A	1.684	5.638	8.8	13.52	N.A	-0.164336	-0.0844311	-0.0243902	0.00728155	N.A	N.A	-0.190385	-0.143161	-0.00226757	0.145763	N.A	Urszula Domańska, Andrzej Marciniak. Activity coefficients at infinite dilution measurements for organic solutes and water in the ionic liquid 4-methyl-N-butyl-pyridinium bis(trifluoromethylsulfonyl)-imide. J. Chem. Thermodynamics, 2009, 41: 1350–1355
[C4MPy][NTf2]	338.15	1.31	1.53	1.87	2.08	N.A	N.A	2.08	6.37	8.51	11.3	N.A	1.176	1.501	1.959	2.107	N.A	N.A	1.698	5.478	8.51	13.01	N.A	-0.10229	-0.0189542	0.0475936	0.0129808	N.A	N.A	-0.183654	-0.140031	0	0.151327	N.A	Urszula Domańska, Andrzej Marciniak. Activity coefficients at infinite dilution measurements for organic solutes and water in the ionic liquid 4-methyl-N-butyl-pyridinium bis(trifluoromethylsulfonyl)-imide. J. Chem. Thermodynamics, 2009, 41: 1350–1355
[C4MPy][NTf2]	348.15	1.21	1.41	1.71	2.1	N.A	N.A	2.09	6.17	8.24	10.9	N.A	1.158	1.475	1.921	2.136	N.A	N.A	1.71	5.328	8.239	12.54	N.A	-0.0429752	0.0460993	0.123392	0.0171429	N.A	N.A	-0.181818	-0.136467	-0.000121359	0.150459	N.A	Urszula Domańska, Andrzej Marciniak. Activity coefficients at infinite dilution measurements for organic solutes and water in the ionic liquid 4-methyl-N-butyl-pyridinium bis(trifluoromethylsulfonyl)-imide. J. Chem. Thermodynamics, 2009, 41: 1350–1355
[C4MPy][NTf2]	358.15	1.12	1.3	1.57	2.12	N.A	N.A	2.09	5.99	7.99	10.4	N.A	1.141	1.451	1.885	2.162	N.A	N.A	1.72	5.188	7.985	12.1	N.A	0.01875	0.116154	0.200637	0.0198113	N.A	N.A	-0.177033	-0.13389	-0.000625782	0.163462	N.A	Urszula Domańska, Andrzej Marciniak. Activity coefficients at infinite dilution measurements for organic solutes and water in the ionic liquid 4-methyl-N-butyl-pyridinium bis(trifluoromethylsulfonyl)-imide. J. Chem. Thermodynamics, 2009, 41: 1350–1355
[C4MPy][NTf2]	368.15	1.04	1.2	1.46	2.15	N.A	N.A	2.09	5.82	7.76	10.1	N.A	1.125	1.428	1.851	2.186	N.A	N.A	1.729	5.055	7.747	11.68	N.A	0.0817308	0.19	0.267808	0.0167442	N.A	N.A	-0.172727	-0.131443	-0.00167526	0.156436	N.A	Urszula Domańska, Andrzej Marciniak. Activity coefficients at infinite dilution measurements for organic solutes and water in the ionic liquid 4-methyl-N-butyl-pyridinium bis(trifluoromethylsulfonyl)-imide. J. Chem. Thermodynamics, 2009, 41: 1350–1355
[C2MIm][FAP]_x0001_	313	3.29	4.46	N.A	N.A	N.A	N.A	N.A	6.66	N.A	18.84	N.A	2.084	2.808	N.A	N.A	N.A	N.A	N.A	6.481	N.A	17.38	N.A	-0.366565	-0.370404	N.A	N.A	N.A	N.A	N.A	-0.0268769	N.A	-0.0774947	N.A	Pei-Fang Yan, Miao Yang, Xiu-Mei Liu, Qing-Shan Liu, Zhi-Cheng Tan, and Urs Welz-Biermann. Activity Coefficients at Infinite Dilution of Organic Solutes in 1-Ethyl-3-methylimidazolium Tris(pentafluoroethyl)trifluorophosphate [EMIM][FAP] Using Gas-Liquid Chromatography. J. Chem. Eng. Data, 2010, 55: 2444–2450
[C2MIm][FAP]_x0001_	323	2.86	3.87	N.A	N.A	N.A	N.A	N.A	5.49	N.A	16.39	N.A	2.107	2.831	N.A	N.A	N.A	N.A	N.A	6.544	N.A	17.37	N.A	-0.263287	-0.268475	N.A	N.A	N.A	N.A	N.A	0.191985	N.A	0.0597926	N.A	Pei-Fang Yan, Miao Yang, Xiu-Mei Liu, Qing-Shan Liu, Zhi-Cheng Tan, and Urs Welz-Biermann. Activity Coefficients at Infinite Dilution of Organic Solutes in 1-Ethyl-3-methylimidazolium Tris(pentafluoroethyl)trifluorophosphate [EMIM][FAP] Using Gas-Liquid Chromatography. J. Chem. Eng. Data, 2010, 55: 2444–2450
[C2MIm][FAP]_x0001_	333	2.44	3.35	N.A	N.A	N.A	N.A	0.837	4.64	N.A	14.76	N.A	2.123	2.846	N.A	N.A	N.A	N.A	0.7503	6.578	N.A	17.28	N.A	-0.129918	-0.150448	N.A	N.A	N.A	N.A	-0.103584	0.417672	N.A	0.170732	N.A	Pei-Fang Yan, Miao Yang, Xiu-Mei Liu, Qing-Shan Liu, Zhi-Cheng Tan, and Urs Welz-Biermann. Activity Coefficients at Infinite Dilution of Organic Solutes in 1-Ethyl-3-methylimidazolium Tris(pentafluoroethyl)trifluorophosphate [EMIM][FAP] Using Gas-Liquid Chromatography. J. Chem. Eng. Data, 2010, 55: 2444–2450
[C2MIm][FAP]_x0001_	343	2.17	2.92	N.A	N.A	N.A	N.A	0.866	3.93	N.A	12.89	N.A	2.132	2.852	N.A	N.A	N.A	N.A	0.798	6.588	N.A	17.14	N.A	-0.0175115	-0.0232877	N.A	N.A	N.A	N.A	-0.0785219	0.676336	N.A	0.329713	N.A	Pei-Fang Yan, Miao Yang, Xiu-Mei Liu, Qing-Shan Liu, Zhi-Cheng Tan, and Urs Welz-Biermann. Activity Coefficients at Infinite Dilution of Organic Solutes in 1-Ethyl-3-methylimidazolium Tris(pentafluoroethyl)trifluorophosphate [EMIM][FAP] Using Gas-Liquid Chromatography. J. Chem. Eng. Data, 2010, 55: 2444–2450
[C2MIm][FAP]_x0001_	353	1.88	2.59	N.A	N.A	N.A	N.A	0.897	3.34	N.A	11.11	N.A	2.136	2.852	N.A	N.A	N.A	N.A	0.8442	6.579	N.A	16.95	N.A	0.13617	0.101158	N.A	N.A	N.A	N.A	-0.0588629	0.96976	N.A	0.525653	N.A	Pei-Fang Yan, Miao Yang, Xiu-Mei Liu, Qing-Shan Liu, Zhi-Cheng Tan, and Urs Welz-Biermann. Activity Coefficients at Infinite Dilution of Organic Solutes in 1-Ethyl-3-methylimidazolium Tris(pentafluoroethyl)trifluorophosphate [EMIM][FAP] Using Gas-Liquid Chromatography. J. Chem. Eng. Data, 2010, 55: 2444–2450
[C4MIm]NTf2]_x0001_	298	1.88	2.68	2.96	N.A	N.A	N.A	N.A	7.67	11.4	16.8	0.48	N.A	1.924	2.499	N.A	N.A	N.A	N.A	5.831	9.097	13.97	0.4541	N.A	-0.28209	-0.155743	N.A	N.A	N.A	N.A	-0.239765	-0.202018	-0.168452	-0.0539583	Andreas Heintz, Lidia M. Casás, Igor A. Nesterov, Vladimir N. Emel’yanenko, and Sergey P. Verevkin. Thermodynamic Properties of Mixtures Containing Ionic Liquids. 5. Activity Coefficients at Infinite Dilution of Hydrocarbons, Alcohols, Esters, and Aldehydes in 1-Methyl-3-butyl-imidazolium Bis(trifluoromethyl-sulfonyl) Imide Using Gas-Liquid Chromatography. J. Chem. Eng. Data, 2005, 50: 1510-1514
[C4MIm]NTf2]_x0001_	298	2.1	2.6	2.7	N.A	N.A	N.A	N.A	4.6	6.5	9	0.47	1.316	1.591	1.969	N.A	N.A	N.A	N.A	3.8	5.649	8.266	0.4377	-0.373333	-0.388077	-0.270741	N.A	N.A	N.A	N.A	-0.173913	-0.130923	-0.0815556	-0.0687234	Andreas Heintz and Sergey P. Verevkin. Thermodynamic Properties of Mixtures Containing Ionic Liquids. 8. Activity Coefficients at Infinite Dilution of Hydrocarbons, Alcohols, Esters, and Aldehydes in 1-Hexyl-3-methylimidazolium Bis(trifluoromethylsulfonyl) Imide Using Gas-Liquid Chromatography. J. Chem. Eng. Data, 2006, 51: 434-437
[C6MIm][FAP]	312.8	2.095	2.467	4.903	N.A	N.A	N.A	0.837	3.668	N.A	N.A	0.295	1.605	1.987	2.517	N.A	N.A	N.A	0.7503	2.184	N.A	N.A	0.2447	-0.23389	-0.194568	-0.486641	N.A	N.A	N.A	-0.103584	-0.40458	N.A	N.A	-0.170508	Jean-Charles MoĪse, Fabrice Mutelet, Jean-No€el Jaubert, Laura M. Grubbs, William E. Acree, Jr., and Gary A. Baker. Activity Coefficients at Infinite Dilution of Organic Compounds in Four New Imidazolium-Based Ionic Liquids. J. Chem. Eng. Data, 2011 , 56 (7): 3106-3114
[C6MIm][FAP]_x0001_	332.85	1.688	1.958	2.324	N.A	N.A	N.A	0.866	3.422	N.A	N.A	0.295	1.623	2.003	2.526	N.A	N.A	N.A	0.798	2.305	N.A	N.A	0.2706	-0.0385071	0.0229826	0.0869191	N.A	N.A	N.A	-0.0785219	-0.326417	N.A	N.A	-0.0827119	Jean-Charles MoĪse, Fabrice Mutelet, Jean-No€el Jaubert, Laura M. Grubbs, William E. Acree, Jr., and Gary A. Baker. Activity Coefficients at Infinite Dilution of Organic Compounds in Four New Imidazolium-Based Ionic Liquids. J. Chem. Eng. Data, 2011 , 56 (7): 3106-3114
[C6MIm][FAP]_x0001_	354.65	1.312	1.466	1.756	N.A	N.A	N.A	0.897	3.142	N.A	N.A	0.292	1.622	1.996	2.508	N.A	N.A	N.A	0.8442	2.396	N.A	N.A	0.2974	0.23628	0.361528	0.428246	N.A	N.A	N.A	-0.0588629	-0.237428	N.A	N.A	0.0184932	Jean-Charles MoĪse, Fabrice Mutelet, Jean-No€el Jaubert, Laura M. Grubbs, William E. Acree, Jr., and Gary A. Baker. Activity Coefficients at Infinite Dilution of Organic Compounds in Four New Imidazolium-Based Ionic Liquids. J. Chem. Eng. Data, 2011 , 56 (7): 3106-3114
[N1,1,1,4][NTf2]	298	2.29	2.91	3.85	N.A	N.A	N.A	N.A	N.A	N.A	N.A	N.A	3.352	4.573	6.387	N.A	N.A	N.A	N.A	N.A	N.A	N.A	N.A	0.463755	0.571478	0.658961	N.A	N.A	N.A	N.A	N.A	N.A	N.A	N.A	Andreas Heintz, Tatiana V. Vasiltsova, Javid Safarov, Eckard Bich, and Sergey P. Verevkin. Thermodynamic Properties of Mixtures Containing Ionic Liquids. 9. Activity Coefficients at Infinite Dilution of Hydrocarbons, Alcohols, Esters, and Aldehydes in Trimethyl-butylammonium Bis(trifluoromethylsulfonyl) Imide Using Gas-Liquid Chromatography and Static Method. J. Chem. Eng. Data, 2006, 51: 648-655
[CH3CH2OHMIm][FAP]	318.15	0.789	1.11	1.57	0.583	1.37	0.995	0.668	14.2	22	34.7	0.138	0.9379	1.333	1.937	1.352	4.185	2.254	1.277	12.59	21.89	37.45	0.1884	0.18872	0.200901	0.233758	1.31904	2.05474	1.26533	0.911677	-0.11338	-0.005	0.0792507	0.365217	Andrzej Marciniak, Michał Wlazło. Activity coefficients at infinite dilution and physicochemical properties for organic solutes and water in the ionic liquid 1-(2-hydroxyethyl)- 3-methylimidazolium trifluorotris(perfluoroethyl)phosphate. J. Chem. Thermodynamics, 2013, 64: 114–119
[CH3CH2OHMIm][FAP]	328.15	0.801	1.12	1.55	0.684	1.58	1.15	0.765	13.4	20.9	32.5	0.153	0.9572	1.355	1.962	1.404	4.232	2.328	1.307	12.2	21.08	35.84	0.1983	0.195006	0.209821	0.265806	1.05263	1.67848	1.02435	0.708497	-0.0895522	0.00861244	0.102769	0.296078	Andrzej Marciniak, Michał Wlazło. Activity coefficients at infinite dilution and physicochemical properties for organic solutes and water in the ionic liquid 1-(2-hydroxyethyl)- 3-methylimidazolium trifluorotris(perfluoroethyl)phosphate. J. Chem. Thermodynamics, 2013, 64: 114–119
[CH3CH2OHMIm][FAP]	338.15	0.811	1.12	1.54	0.787	1.79	1.3	0.861	12.8	19.7	30.1	0.169	0.9743	1.375	1.983	1.453	4.272	2.398	1.334	11.82	20.29	34.28	0.2081	0.201356	0.227679	0.287662	0.846252	1.38659	0.844615	0.549361	-0.0765625	0.0299492	0.13887	0.231361	Andrzej Marciniak, Michał Wlazło. Activity coefficients at infinite dilution and physicochemical properties for organic solutes and water in the ionic liquid 1-(2-hydroxyethyl)- 3-methylimidazolium trifluorotris(perfluoroethyl)phosphate. J. Chem. Thermodynamics, 2013, 64: 114–119
[CH3CH2OHMIm][FAP]	348.15	0.821	1.13	1.52	0.907	2.04	1.48	0.97	12.3	18.7	28.3	0.185	0.9896	1.392	2	1.499	4.303	2.463	1.36	11.44	19.52	32.79	0.2179	0.205359	0.231858	0.315789	0.652701	1.10931	0.664189	0.402062	-0.0699187	0.0438503	0.158657	0.177838	Andrzej Marciniak, Michał Wlazło. Activity coefficients at infinite dilution and physicochemical properties for organic solutes and water in the ionic liquid 1-(2-hydroxyethyl)- 3-methylimidazolium trifluorotris(perfluoroethyl)phosphate. J. Chem. Thermodynamics, 2013, 64: 114–119
[CH3CH2OHMIm][FAP]	358.15	0.829	1.13	1.51	1.03	2.27	1.66	1.08	11.8	17.8	26.7	0.202	1.003	1.406	2.014	1.544	4.329	2.523	1.383	11.07	18.78	31.35	0.2275	0.209891	0.244248	0.333775	0.499029	0.907048	0.51988	0.280556	-0.0618644	0.0550562	0.174157	0.126238	Andrzej Marciniak, Michał Wlazło. Activity coefficients at infinite dilution and physicochemical properties for organic solutes and water in the ionic liquid 1-(2-hydroxyethyl)- 3-methylimidazolium trifluorotris(perfluoroethyl)phosphate. J. Chem. Thermodynamics, 2013, 64: 114–119
[CH3CH2OHMIm][FAP]	368.15	0.838	1.13	1.5	1.16	2.52	1.84	1.2	11.3	17.1	25.2	0.22	1.015	1.419	2.025	1.585	4.348	2.579	1.405	10.71	18.06	29.99	0.237	0.211217	0.255752	0.35	0.366379	0.725397	0.40163	0.170833	-0.0522124	0.0561404	0.190079	0.0772727	Andrzej Marciniak, Michał Wlazło. Activity coefficients at infinite dilution and physicochemical properties for organic solutes and water in the ionic liquid 1-(2-hydroxyethyl)- 3-methylimidazolium trifluorotris(perfluoroethyl)phosphate. J. Chem. Thermodynamics, 2013, 64: 114–119
[C2MIm][NTf2]	313	1.525	2.088	2.945	2.416	N.A	3.856	N.A	N.A	N.A	N.A	0.435	1.779	2.401	3.315	3.964	N.A	6.279	N.A	N.A	N.A	N.A	0.4907	0.166557	0.149904	0.125637	0.640728	N.A	0.628371	N.A	N.A	N.A	N.A	0.128046	Andreas Heintz, Dmitry V. Kulikov, and Sergey P. Verevkin. Thermodynamic Properties of Mixtures Containing Ionic Liquids. 2. Activity Coefficients at Infinite Dilution of Hydrocarbons and Polar Solutes in 1-Methyl-3-ethyl- Bis(trifluoromethyl-sulfonyl) Amide and inimidazolium 1,2-Dimethyl-3-ethyl-imidazolium Bis(trifluoromethyl-sulfonyl) Amide Using Gas-Liquid Chromatography. chemical Engineering…
[C4MIm][NTf2]	298.15	N.A	N.A	N.A	N.A	N.A	N.A	N.A	4.74	N.A	8.36	N.A	N.A	N.A	N.A	N.A	N.A	N.A	N.A	3.799	N.A	8.262	N.A	N.A	N.A	N.A	N.A	N.A	N.A	N.A	-0.198523	N.A	-0.0117225	N.A	Trevor M. Letcher, Andrzej Marciniak, Małgorzata Marciniak, Urszula Domańska. Activity coefficients at infinite dilution measurements for organic solutes in the ionic liquid 1-hexyl-3-methyl-imidazolium bis(trifluoromethylsulfonyl)-imide using g.l.c. at T = (298.15, 313.15, and 333.15) K. J. Chem. Eng. Data 2002, 47, 894-899
[C4MIm][NTf2]	313.15	N.A	N.A	N.A	N.A	N.A	N.A	N.A	4.57	N.A	7.77	N.A	N.A	N.A	N.A	N.A	N.A	N.A	N.A	3.665	N.A	7.873	N.A	N.A	N.A	N.A	N.A	N.A	N.A	N.A	-0.198031	N.A	0.0132561	N.A	Trevor M. Letcher, Andrzej Marciniak, Małgorzata Marciniak, Urszula Domańska. Activity coefficients at infinite dilution measurements for organic solutes in the ionic liquid 1-hexyl-3-methyl-imidazolium bis(trifluoromethylsulfonyl)-imide using g.l.c. at T = (298.15, 313.15, and 333.15) K. J. Chem. Eng. Data 2002, 47, 894-899
[C4MIm][NTf2]	333.15	N.A	N.A	N.A	N.A	N.A	N.A	N.A	4.36	N.A	7.18	N.A	N.A	N.A	N.A	N.A	N.A	N.A	N.A	3.506	N.A	7.414	N.A	N.A	N.A	N.A	N.A	N.A	N.A	N.A	-0.195872	N.A	0.0325905	N.A	Trevor M. Letcher, Andrzej Marciniak, Małgorzata Marciniak, Urszula Domańska. Activity coefficients at infinite dilution measurements for organic solutes in the ionic liquid 1-hexyl-3-methyl-imidazolium bis(trifluoromethylsulfonyl)-imide using g.l.c. at T = (298.15, 313.15, and 333.15) K. J. Chem. Eng. Data 2002, 47, 894-899
[C2MIm][NTf2]	323	1.411	1.895	2.679	2.413	N.A	3.849	N.A	N.A	N.A	N.A	0.429	1.436	1.833	2.393	2.83	N.A	4.235	N.A	N.A	N.A	14.32	0.4647	0.0177179	-0.0327177	-0.106756	0.172814	N.A	0.100286	N.A	N.A	N.A	N.A	0.0832168	Andreas Heintz, Dmitry V. Kulikov, and Sergey P. Verevkin. Thermodynamic Properties of Mixtures Containing Ionic Liquids. 2. Activity Coefficients at Infinite Dilution of Hydrocarbons and Polar Solutes in 1-Methyl-3-ethyl- Bis(trifluoromethyl-sulfonyl) Amide and inimidazolium 1,2-Dimethyl-3-ethyl-imidazolium Bis(trifluoromethyl-sulfonyl) Amide Using Gas-Liquid Chromatography. J. Chem. Eng. Data, …
[C2MIm][NTf2]	333	1.29	1.737	2.393	2.405	N.A	3.83	N.A	N.A	N.A	N.A	0.425	1.404	1.788	2.329	2.878	N.A	4.291	N.A	N.A	N.A	13.81	0.4672	0.0883721	0.029361	-0.0267447	0.196674	N.A	0.120366	N.A	N.A	N.A	N.A	0.0992941	Andreas Heintz, Dmitry V. Kulikov, and Sergey P. Verevkin. Thermodynamic Properties of Mixtures Containing Ionic Liquids. 2. Activity Coefficients at Infinite Dilution of Hydrocarbons and Polar Solutes in 1-Methyl-3-ethyl- Bis(trifluoromethyl-sulfonyl) Amide and inimidazolium 1,2-Dimethyl-3-ethyl-imidazolium Bis(trifluoromethyl-sulfonyl) Amide Using Gas-Liquid Chromatography. J. Chem. Eng. Data, …
[C2MIm][NTf2]	343	1.187	1.594	2.162	2.396	N.A	3.823	N.A	N.A	N.A	N.A	0.419	1.374	1.747	2.271	2.921	N.A	4.342	N.A	N.A	N.A	N.A	0.4693	0.15754	0.0959849	0.0504163	0.219115	N.A	0.135757	N.A	N.A	N.A	N.A	0.120048	Andreas Heintz, Dmitry V. Kulikov, and Sergey P. Verevkin. Thermodynamic Properties of Mixtures Containing Ionic Liquids. 2. Activity Coefficients at Infinite Dilution of Hydrocarbons and Polar Solutes in 1-Methyl-3-ethyl- Bis(trifluoromethyl-sulfonyl) Amide and inimidazolium 1,2-Dimethyl-3-ethyl-imidazolium Bis(trifluoromethyl-sulfonyl) Amide Using Gas-Liquid Chromatography. J. Chem. Eng. Data, …
[C2C1MIm][NTf2]	313	2.043	2.759	3.892	2.87	N.A	4.667	N.A	N.A	N.A	N.A	0.462	1.472	1.882	2.463	2.779	N.A	4.171	N.A	N.A	N.A	N.A	0.4619	-0.279491	-0.317869	-0.367163	-0.0317073	N.A	-0.106278	N.A	N.A	N.A	N.A	-0.00021645	Andreas Heintz, Dmitry V. Kulikov, and Sergey P. Verevkin. Thermodynamic Properties of Mixtures Containing Ionic Liquids. 2. Activity Coefficients at Infinite Dilution of Hydrocarbons and Polar Solutes in 1-Methyl-3-ethyl- Bis(trifluoromethyl-sulfonyl) Amide and inimidazolium 1,2-Dimethyl-3-ethyl-imidazolium Bis(trifluoromethyl-sulfonyl) Amide Using Gas-Liquid Chromatography. J. Chem. Eng. Data, …
[C2C1MIm][NTf2]	323	1.825	2.484	3.425	2.825	N.A	4.553	N.A	N.A	N.A	N.A	0.464	1.436	1.833	2.393	2.83	N.A	4.235	N.A	N.A	N.A	N.A	0.4647	-0.213151	-0.262077	-0.301314	0.00176991	N.A	-0.0698441	N.A	N.A	N.A	N.A	0.00150862	Andreas Heintz, Dmitry V. Kulikov, and Sergey P. Verevkin. Thermodynamic Properties of Mixtures Containing Ionic Liquids. 2. Activity Coefficients at Infinite Dilution of Hydrocarbons and Polar Solutes in 1-Methyl-3-ethyl- Bis(trifluoromethyl-sulfonyl) Amide and inimidazolium 1,2-Dimethyl-3-ethyl-imidazolium Bis(trifluoromethyl-sulfonyl) Amide Using Gas-Liquid Chromatography. J. Chem. Eng. Data, …
[C2C1MIm][NTf2]	333	1.648	2.197	3.01	2.759	N.A	4.446	N.A	N.A	N.A	N.A	0.468	1.404	1.788	2.329	2.878	N.A	4.291	N.A	N.A	N.A	N.A	0.4672	-0.148058	-0.186163	-0.226246	0.0431316	N.A	-0.0348628	N.A	N.A	N.A	N.A	-0.0017094	Andreas Heintz, Dmitry V. Kulikov, and Sergey P. Verevkin. Thermodynamic Properties of Mixtures Containing Ionic Liquids. 2. Activity Coefficients at Infinite Dilution of Hydrocarbons and Polar Solutes in 1-Methyl-3-ethyl- Bis(trifluoromethyl-sulfonyl) Amide and inimidazolium 1,2-Dimethyl-3-ethyl-imidazolium Bis(trifluoromethyl-sulfonyl) Amide Using Gas-Liquid Chromatography. J. Chem. Eng. Data, …
[C2C1MIm][NTf2]	343	1.49	1.985	2.689	2.692	N.A	4.343	N.A	N.A	N.A	N.A	0.469	1.374	1.747	2.271	2.921	N.A	4.342	N.A	N.A	N.A	N.A	0.4693	-0.0778523	-0.119899	-0.155448	0.0850669	N.A	-0.000230256	N.A	N.A	N.A	N.A	0.000639659	Andreas Heintz, Dmitry V. Kulikov, and Sergey P. Verevkin. Thermodynamic Properties of Mixtures Containing Ionic Liquids. 2. Activity Coefficients at Infinite Dilution of Hydrocarbons and Polar Solutes in 1-Methyl-3-ethyl- Bis(trifluoromethyl-sulfonyl) Amide and inimidazolium 1,2-Dimethyl-3-ethyl-imidazolium Bis(trifluoromethyl-sulfonyl) Amide Using Gas-Liquid Chromatography. J. Chem. Eng. Data, …
[C4MIm][PF6]	313.15	2.4	3.18	N.A	N.A	N.A	N.A	N.A	13.6	20.2	25.7	N.A	2.4	3.632	N.A	N.A	N.A	N.A	N.A	15.18	28.15	51.35	N.A	0	0.142138	N.A	N.A	N.A	N.A	N.A	0.116176	0.393564	0.998054	N.A	Eugene Olivier, Trevor M. Letcher, Paramespri Naidoo, Deresh Ramjugernath. Activity coefficients at infinite dilution of organic solutes in the ionic liquid 1-butyl-3-methylimidazolium hexafluoroantimonate using gas–liquid chromatography at T = (313.15, 323.15, and 333.15) K. J. Chem. Thermodynamics, 2011, 43: 829–833
[C4MIm][PF6]	323.15	2.22	2.89	N.A	N.A	N.A	N.A	N.A	13.6	18.7	25.2	N.A	2.357	3.563	N.A	N.A	N.A	N.A	N.A	14.88	27.49	49.98	N.A	0.0617117	0.232872	N.A	N.A	N.A	N.A	N.A	0.0941176	0.470053	0.983333	N.A	Eugene Olivier, Trevor M. Letcher, Paramespri Naidoo, Deresh Ramjugernath. Activity coefficients at infinite dilution of organic solutes in the ionic liquid 1-butyl-3-methylimidazolium hexafluoroantimonate using gas–liquid chromatography at T = (313.15, 323.15, and 333.15) K. J. Chem. Thermodynamics, 2011, 43: 829–833
[C4MIm][PF6]	333.15	2.04	2.63	N.A	N.A	N.A	N.A	N.A	13.6	16.2	24.6	N.A	2.314	3.496	N.A	N.A	N.A	N.A	N.A	14.59	26.86	48.67	N.A	0.134314	0.329278	N.A	N.A	N.A	N.A	N.A	0.0727941	0.658025	0.978455	N.A	Eugene Olivier, Trevor M. Letcher, Paramespri Naidoo, Deresh Ramjugernath. Activity coefficients at infinite dilution of organic solutes in the ionic liquid 1-butyl-3-methylimidazolium hexafluoroantimonate using gas–liquid chromatography at T = (313.15, 323.15, and 333.15) K. J. Chem. Thermodynamics, 2011, 43: 829–833
[C2MIm][CH3SO3]	308.15	0.489	0.761	N.A	23.6	66.5	N.A	19.2	85.1	148	258	0.799	0.3661	0.6308	N.A	27.63	81.11	N.A	15.9	64.44	136.2	283.3	0.8103	-0.251329	-0.171091	N.A	0.170763	0.219699	N.A	-0.171875	-0.242773	-0.0797297	0.098062	0.0141427	J. Chem. Thermodynamics, 2012 , 54 (54): 20-27. Measurements of activity coefficients at infinite dilution for organic solutes and water in the ionic liquid 1-ethyl-3-methylimidazolium methanesulfonate. J. Chem. Thermodynamics, 2012 , 54 (54): 20-27
[C2MIm][CH3SO3]	318.15	0.483	0.75	N.A	22.5	60.8	N.A	18.2	77.1	134	228	0.818	0.4022	0.6928	N.A	27.86	81.11	N.A	15.97	63.6	134	278	0.8275	-0.167288	-0.0762667	N.A	0.238222	0.334046	N.A	-0.122527	-0.175097	0	0.219298	0.0116137	J. Chem. Thermodynamics, 2012 , 54 (54): 20-27. Measurements of activity coefficients at infinite dilution for organic solutes and water in the ionic liquid 1-ethyl-3-methylimidazolium methanesulfonate. J. Chem. Thermodynamics, 2012 , 54 (54): 20-27
[C2MIm][CH3SO3]	328.15	0.479	0.736	N.A	21.7	57.1	N.A	17.5	70.4	122	206	0.841	0.4392	0.7562	N.A	28.06	81.01	N.A	16.03	62.76	131.9	272.6	0.844	-0.0830898	0.0274457	N.A	0.293088	0.418739	N.A	-0.084	-0.108523	0.0811475	0.323301	0.00356718	J. Chem. Thermodynamics, 2012 , 54 (54): 20-27. Measurements of activity coefficients at infinite dilution for organic solutes and water in the ionic liquid 1-ethyl-3-methylimidazolium methanesulfonate. J. Chem. Thermodynamics, 2012 , 54 (54): 20-27
[C2MIm][CH3SO3]	338.15	0.474	0.724	N.A	20.7	53.5	N.A	16.8	63.9	112	187	0.86	0.477	0.8209	N.A	28.22	80.81	N.A	16.07	61.91	129.7	267.3	0.8597	0.00632911	0.13384	N.A	0.363285	0.510467	N.A	-0.0434524	-0.0311424	0.158036	0.429412	-0.000348837	J. Chem. Thermodynamics, 2012 , 54 (54): 20-27. Measurements of activity coefficients at infinite dilution for organic solutes and water in the ionic liquid 1-ethyl-3-methylimidazolium methanesulfonate. J. Chem. Thermodynamics, 2012 , 54 (54): 20-27
[C2MIm][CH3SO3]	348.15	0.47	0.716	N.A	20	50	N.A	16.1	N.A	102	170	0.877	0.5153	0.8865	N.A	28.36	80.55	N.A	16.1	N.A	127.5	262	0.8747	0.096383	0.238128	N.A	0.418	0.611	N.A	0	N.A	0.25	0.541176	-0.00262258	J. Chem. Thermodynamics, 2012 , 54 (54): 20-27. Measurements of activity coefficients at infinite dilution for organic solutes and water in the ionic liquid 1-ethyl-3-methylimidazolium methanesulfonate. J. Chem. Thermodynamics, 2012 , 54 (54): 20-27
[C2MIm][CH3SO3]	358.15	0.467	0.708	N.A	N.A	N.A	N.A	N.A	N.A	N.A	N.A	0.892	0.5542	0.953	N.A	N.A	N.A	N.A	N.A	N.A	N.A	N.A	0.8889	0.186724	0.346045	N.A	N.A	N.A	N.A	N.A	N.A	N.A	N.A	-0.00347534	J. Chem. Thermodynamics, 2012 , 54 (54): 20-27. Measurements of activity coefficients at infinite dilution for organic solutes and water in the ionic liquid 1-ethyl-3-methylimidazolium methanesulfonate. J. Chem. Thermodynamics, 2012 , 54 (54): 20-27
[CH3OC2MPip][FAP]	318.15	2.5	3.06	3.75	1.28	2.9	1.84	1.32	5.03	6.97	9.81	0.3	1.819	2.541	3.632	1.161	3.413	1.902	1.099	4.056	6.932	11.66	0.3009	-0.2724	-0.169608	-0.0314667	-0.0929687	0.176897	0.0336957	-0.167424	-0.193638	-0.00545194	0.188583	0.003	Andrzej Marciniak, Michał Wlazło. Activity coefficients at infinite dilution and physicochemical properties for organic solutes and water in the ionic liquid 1-(2-methoxyethyl)- 1-methylpiperidinium trifluorotris(perfluoroethyl)phosphate. J. Chem. Thermodynamics, 2013, 53: 197–202
[CH3OC2MPip][FAP]	328.15	2.3	2.8	3.44	1.35	2.97	1.92	1.38	5	6.89	9.6	0.315	1.797	2.499	3.553	1.202	3.436	1.958	1.122	4.103	6.962	11.62	0.3149	-0.218696	-0.1075	0.0328488	-0.10963	0.156902	0.0197917	-0.186957	-0.1794	0.0104499	0.210417	-0.00031746	Andrzej Marciniak, Michał Wlazło. Activity coefficients at infinite dilution and physicochemical properties for organic solutes and water in the ionic liquid 1-(2-methoxyethyl)- 1-methylpiperidinium trifluorotris(perfluoroethyl)phosphate. J. Chem. Thermodynamics, 2013, 53: 197–202
[CH3OC2MPip][FAP]	338.15	2.1	2.52	3.09	1.43	3.05	2.01	1.45	4.97	6.82	9.39	0.327	1.773	2.454	3.473	1.241	3.452	2.009	1.143	4.134	6.964	11.55	0.3284	-0.155714	-0.0261905	0.123948	-0.132168	0.131803	-0.000497512	-0.211724	-0.168209	0.0211144	0.230032	0.00428135	Andrzej Marciniak, Michał Wlazło. Activity coefficients at infinite dilution and physicochemical properties for organic solutes and water in the ionic liquid 1-(2-methoxyethyl)- 1-methylpiperidinium trifluorotris(perfluoroethyl)phosphate. J. Chem. Thermodynamics, 2013, 53: 197–202
[CH3OC2MPip][FAP]	348.15	1.95	2.34	2.84	1.5	3.11	2.08	1.51	4.95	6.75	9.19	0.344	1.746	2.407	3.391	1.277	3.462	2.056	1.162	4.151	6.944	11.43	0.3415	-0.104615	0.0286325	0.194014	-0.148667	0.113183	-0.0115385	-0.230464	-0.161414	0.0287407	0.243743	-0.00726744	Andrzej Marciniak, Michał Wlazło. Activity coefficients at infinite dilution and physicochemical properties for organic solutes and water in the ionic liquid 1-(2-methoxyethyl)- 1-methylpiperidinium trifluorotris(perfluoroethyl)phosphate. J. Chem. Thermodynamics, 2013, 53: 197–202
[CH3OC2MPip][FAP]	358.15	1.81	2.16	2.61	1.57	3.18	2.15	1.57	4.93	6.67	9.01	0.356	1.719	2.36	3.31	1.311	3.466	2.098	1.178	4.155	6.905	11.29	0.3542	-0.0502762	0.0925926	0.268199	-0.164968	0.0899371	-0.024186	-0.249682	-0.157201	0.0352324	0.253052	-0.00505618	Andrzej Marciniak, Michał Wlazło. Activity coefficients at infinite dilution and physicochemical properties for organic solutes and water in the ionic liquid 1-(2-methoxyethyl)- 1-methylpiperidinium trifluorotris(perfluoroethyl)phosphate. J. Chem. Thermodynamics, 2013, 53: 197–202
[CH3OC2MPip][FAP]	368.15	1.69	2.02	2.41	1.65	3.25	2.23	1.63	4.9	6.62	8.86	0.371	1.69	2.312	3.229	1.342	3.465	2.136	1.193	4.149	6.851	11.13	0.3664	0	0.144554	0.339834	-0.186667	0.0661538	-0.0421525	-0.268098	-0.153265	0.0348943	0.256208	-0.0123989	Andrzej Marciniak, Michał Wlazło. Activity coefficients at infinite dilution and physicochemical properties for organic solutes and water in the ionic liquid 1-(2-methoxyethyl)- 1-methylpiperidinium trifluorotris(perfluoroethyl)phosphate. J. Chem. Thermodynamics, 2013, 53: 197–202
[CH3OC2MPip][NTf2]	318.15	1.73	2.13	2.72	2.56	5.82	3.74	2.6	8.78	12.4	18.1	0.471	1.485	2.088	3.004	3.182	7.642	5.249	2.446	8.683	14.94	25.3	0.4692	-0.141618	-0.0197183	0.104412	0.242969	0.313058	0.403476	-0.0592308	-0.0110478	0.204839	0.39779	-0.00382166	Andrzej Marciniak, Michał Wlazło. Activity coefficients at infinite dilution and physicochemical properties for organic solutes and water in the ionic liquid 1-(2-methoxyethyl)-1-methylpiperidinium bis(trifluoromethylsulfonyl)-amide. J. Chem. Thermodynamics, 2012,49: 137–145
[CH3OC2MPip][NTf2]	328.15	1.58	1.93	2.45	2.59	5.71	3.73	2.59	8.38	11.9	17	0.471	1.434	2.006	2.869	3.186	7.488	5.219	2.435	8.31	14.18	23.82	0.471	-0.0924051	0.0393782	0.17102	0.230116	0.311384	0.399196	-0.0598456	-0.00835322	0.191597	0.401176	0	Andrzej Marciniak, Michał Wlazło. Activity coefficients at infinite dilution and physicochemical properties for organic solutes and water in the ionic liquid 1-(2-methoxyethyl)-1-methylpiperidinium bis(trifluoromethylsulfonyl)-amide. J. Chem. Thermodynamics, 2012,49: 137–145
[CH3OC2MPip][NTf2]	338.15	1.45	1.77	2.22	2.63	5.62	3.73	2.58	8.05	11.4	16.1	0.473	1.388	1.93	2.745	3.186	7.334	5.183	2.423	7.965	13.48	22.47	0.4724	-0.0427586	0.0903955	0.236486	0.211407	0.304982	0.389544	-0.0608527	-0.010559	0.182456	0.395652	-0.0012685	Andrzej Marciniak, Michał Wlazło. Activity coefficients at infinite dilution and physicochemical properties for organic solutes and water in the ionic liquid 1-(2-methoxyethyl)-1-methylpiperidinium bis(trifluoromethylsulfonyl)-amide. J. Chem. Thermodynamics, 2012,49: 137–145
[CH3OC2MPip][NTf2]	348.15	1.33	1.61	2.01	2.66	5.53	3.73	2.58	7.69	10.8	15.1	0.4733	1.345	1.861	2.633	3.181	7.179	5.142	2.408	7.644	12.84	21.23	0.4735	0.0112782	0.155901	0.30995	0.195865	0.298192	0.378552	-0.0666667	-0.00598179	0.188889	0.40596	0.000422565	Andrzej Marciniak, Michał Wlazło. Activity coefficients at infinite dilution and physicochemical properties for organic solutes and water in the ionic liquid 1-(2-methoxyethyl)-1-methylpiperidinium bis(trifluoromethylsulfonyl)-amide. J. Chem. Thermodynamics, 2012,49: 137–145
[CH3OC2MPip][NTf2]	358.15	1.24	1.5	1.85	2.69	5.44	3.73	2.57	7.45	10.4	14.4	0.474	1.305	1.797	2.529	3.173	7.026	5.096	2.392	7.346	12.25	20.1	0.4743	0.0524194	0.198	0.367027	0.179554	0.291544	0.36622	-0.0692607	-0.0139597	0.177885	0.395833	0.000632911	Andrzej Marciniak, Michał Wlazło. Activity coefficients at infinite dilution and physicochemical properties for organic solutes and water in the ionic liquid 1-(2-methoxyethyl)-1-methylpiperidinium bis(trifluoromethylsulfonyl)-amide. J. Chem. Thermodynamics, 2012,49: 137–145
[CH3OC2MPip][NTf2]	368.15	1.16	1.4	1.71	2.73	5.38	3.72	2.56	7.22	9.99	13.8	0.475	1.268	1.739	2.435	3.162	6.875	5.046	2.374	7.068	11.7	19.05	0.4749	0.0931034	0.242143	0.423977	0.158242	0.277881	0.356452	-0.0726562	-0.0210526	0.171171	0.380435	-0.000210526	Andrzej Marciniak, Michał Wlazło. Activity coefficients at infinite dilution and physicochemical properties for organic solutes and water in the ionic liquid 1-(2-methoxyethyl)-1-methylpiperidinium bis(trifluoromethylsulfonyl)-amide. J. Chem. Thermodynamics, 2012,49: 137–145
[C2MIm][B(CN)4]	298.15	1.58	2.01	2.72	2.82	N.A	N.A	2.71	14.4	22	35	N.A	1.134	1.508	2.052	2.88	N.A	N.A	2.434	9.947	16.26	26.18	N.A	-0.282278	-0.249751	-0.245588	0.0212766	N.A	N.A	-0.101845	-0.309236	-0.260909	-0.252	N.A	Urszula Domańska, Marta Królikowska, William E. Acree Jr., Gary A. Baker. Activity coefficients at infinite dilution measurements for organic solutes and water in the ionic liquid 1-ethyl-3-methylimidazolium tetracyanoborate. J. Chem. Thermodynamics, 2011, 43: 1050–1057
[C2MIm][B(CN)4]	308.15	1.43	1.81	2.41	2.86	N.A	N.A	2.72	13.5	20.4	32	N.A	1.149	1.536	2.101	3.05	N.A	N.A	2.543	10.12	16.59	26.78	N.A	-0.196503	-0.151381	-0.128216	0.0664336	N.A	N.A	-0.0650735	-0.25037	-0.186765	-0.163125	N.A	Urszula Domańska, Marta Królikowska, William E. Acree Jr., Gary A. Baker. Activity coefficients at infinite dilution measurements for organic solutes and water in the ionic liquid 1-ethyl-3-methylimidazolium tetracyanoborate. J. Chem. Thermodynamics, 2011, 43: 1050–1057
[C2MIm][B(CN)4]	318.15	1.32	1.65	2.16	2.9	N.A	N.A	2.73	12.9	19.3	29.9	N.A	1.163	1.563	2.147	3.214	N.A	N.A	2.648	10.28	16.89	27.32	N.A	-0.118939	-0.0527273	-0.00601852	0.108276	N.A	N.A	-0.0300366	-0.203101	-0.12487	-0.0862876	N.A	Urszula Domańska, Marta Królikowska, William E. Acree Jr., Gary A. Baker. Activity coefficients at infinite dilution measurements for organic solutes and water in the ionic liquid 1-ethyl-3-methylimidazolium tetracyanoborate. J. Chem. Thermodynamics, 2011, 43: 1050–1057
[C2MIm][B(CN)4]	328.15	1.21	1.5	1.95	2.94	N.A	N.A	2.74	12.2	18.3	27.8	N.A	1.177	1.588	2.192	3.372	N.A	N.A	2.747	10.42	17.15	27.8	N.A	-0.0272727	0.0586667	0.124103	0.146939	N.A	N.A	0.00255474	-0.145902	-0.0628415	0	N.A	Urszula Domańska, Marta Królikowska, William E. Acree Jr., Gary A. Baker. Activity coefficients at infinite dilution measurements for organic solutes and water in the ionic liquid 1-ethyl-3-methylimidazolium tetracyanoborate. J. Chem. Thermodynamics, 2011, 43: 1050–1057
[C2MIm][B(CN)4]	338.15	1.13	1.39	1.79	2.97	N.A	N.A	2.75	11.6	17.3	25.9	N.A	1.189	1.613	2.235	3.524	N.A	N.A	2.842	10.54	17.39	28.24	N.A	0.0522124	0.160432	0.248603	0.186532	N.A	N.A	0.0334545	-0.0913793	0.00520231	0.0903475	N.A	Urszula Domańska, Marta Królikowska, William E. Acree Jr., Gary A. Baker. Activity coefficients at infinite dilution measurements for organic solutes and water in the ionic liquid 1-ethyl-3-methylimidazolium tetracyanoborate. J. Chem. Thermodynamics, 2011, 43: 1050–1057
[C2MIm][B(CN)4]	348.15	1.05	1.3	1.65	3.01	N.A	N.A	2.76	11.2	16.6	24.5	N.A	1.201	1.636	2.278	3.67	N.A	N.A	2.933	10.65	17.6	28.63	N.A	0.14381	0.258462	0.380606	0.219269	N.A	N.A	0.0626812	-0.0491071	0.060241	0.168571	N.A	Urszula Domańska, Marta Królikowska, William E. Acree Jr., Gary A. Baker. Activity coefficients at infinite dilution measurements for organic solutes and water in the ionic liquid 1-ethyl-3-methylimidazolium tetracyanoborate. J. Chem. Thermodynamics, 2011, 43: 1050–1057
[C2MIm][B(CN)4]	358.15	0.986	1.21	1.53	3.04	N.A	N.A	2.77	10.6	15.7	23.1	N.A	1.213	1.659	2.319	3.81	N.A	N.A	3.018	10.75	17.79	28.98	N.A	0.230223	0.371074	0.515686	0.253289	N.A	N.A	0.0895307	0.0141509	0.133121	0.254545	N.A	Urszula Domańska, Marta Królikowska, William E. Acree Jr., Gary A. Baker. Activity coefficients at infinite dilution measurements for organic solutes and water in the ionic liquid 1-ethyl-3-methylimidazolium tetracyanoborate. J. Chem. Thermodynamics, 2011, 43: 1050–1057
[C2MIm][B(CN)4]	303	1.64	2.12	N.A	N.A	N.A	N.A	N.A	11.28	N.A	30.05	N.A	1.141	1.522	N.A	N.A	N.A	N.A	N.A	10.03	N.A	26.48	N.A	-0.304268	-0.282075	N.A	N.A	N.A	N.A	N.A	-0.110816	N.A	-0.118802	N.A	Pei-Fang Yan, Miao Yang, Xiu-Mei Liu, Chang Wanga, Zhi-Cheng Tan, Urs Welz-Biermann. Activity coefficients at infinite dilution of organic solutes in the ionic liquid 1-ethyl-3-methylimidazolium tetracyanoborate [EMIM][TCB] using gas–liquid chromatography. J. Chem. Thermodynamics, 2010, 42: 817–822
[C2MIm][B(CN)4]	313	1.5	1.92	N.A	N.A	N.A	N.A	N.A	9.74	N.A	26.84	N.A	1.156	1.549	N.A	N.A	N.A	N.A	N.A	10.2	N.A	27.04	N.A	-0.229333	-0.193229	N.A	N.A	N.A	N.A	N.A	0.0472279	N.A	0.00745156	N.A	Pei-Fang Yan, Miao Yang, Xiu-Mei Liu, Chang Wanga, Zhi-Cheng Tan, Urs Welz-Biermann. Activity coefficients at infinite dilution of organic solutes in the ionic liquid 1-ethyl-3-methylimidazolium tetracyanoborate [EMIM][TCB] using gas–liquid chromatography. J. Chem. Thermodynamics, 2010, 42: 817–822
[C2MIm][B(CN)4]	323	1.37	1.74	N.A	N.A	N.A	N.A	N.A	8.39	N.A	24	N.A	1.17	1.575	N.A	N.A	N.A	N.A	N.A	10.35	N.A	27.56	N.A	-0.145985	-0.0948276	N.A	N.A	N.A	N.A	N.A	0.233611	N.A	0.148333	N.A	Pei-Fang Yan, Miao Yang, Xiu-Mei Liu, Chang Wanga, Zhi-Cheng Tan, Urs Welz-Biermann. Activity coefficients at infinite dilution of organic solutes in the ionic liquid 1-ethyl-3-methylimidazolium tetracyanoborate [EMIM][TCB] using gas–liquid chromatography. J. Chem. Thermodynamics, 2010, 42: 817–822
[C2MIm][B(CN)4]	333	1.27	1.6	N.A	N.A	N.A	N.A	N.A	7.35	N.A	21.53	N.A	1.183	1.6	N.A	N.A	N.A	N.A	N.A	10.48	N.A	28.02	N.A	-0.0685039	0	N.A	N.A	N.A	N.A	N.A	0.42585	N.A	0.30144	N.A	Pei-Fang Yan, Miao Yang, Xiu-Mei Liu, Chang Wanga, Zhi-Cheng Tan, Urs Welz-Biermann. Activity coefficients at infinite dilution of organic solutes in the ionic liquid 1-ethyl-3-methylimidazolium tetracyanoborate [EMIM][TCB] using gas–liquid chromatography. J. Chem. Thermodynamics, 2010, 42: 817–822
[C2MIm][B(CN)4]	343	1.16	1.46	N.A	N.A	N.A	N.A	N.A	6.27	N.A	18.97	N.A	1.195	1.624	N.A	N.A	N.A	N.A	N.A	10.59	N.A	28.44	N.A	0.0301724	0.112329	N.A	N.A	N.A	N.A	N.A	0.688995	N.A	0.499209	N.A	Pei-Fang Yan, Miao Yang, Xiu-Mei Liu, Chang Wanga, Zhi-Cheng Tan, Urs Welz-Biermann. Activity coefficients at infinite dilution of organic solutes in the ionic liquid 1-ethyl-3-methylimidazolium tetracyanoborate [EMIM][TCB] using gas–liquid chromatography. J. Chem. Thermodynamics, 2010, 42: 817–822
[C8MIm][NO3]	303.15	0.38	N.A	N.A	N.A	N.A	N.A	N.A	N.A	N.A	N.A	0.6	0.3356	N.A	N.A	N.A	N.A	N.A	N.A	N.A	N.A	N.A	0.5828	-0.116842	N.A	N.A	N.A	N.A	N.A	N.A	N.A	N.A	N.A	-0.0286667	Jia-Dong Duan, Li-Sheng Wang, Kan Jiang, Xin-Xin Wang. Activity coefficients at infinite dilution of organic solutes in 1-octyl-3-methylimidazolium nitrate using gas–liquid chromatography. Fluid Phase Equilibria, 2012, 328 (3): 1-8
[C8MIm][NO3]	313.15	0.37	0.41	N.A	N.A	N.A	N.A	N.A	N.A	N.A	N.A	0.59	0.3489	0.4054	N.A	N.A	N.A	N.A	N.A	N.A	N.A	N.A	0.5821	-0.057027	-0.0112195	N.A	N.A	N.A	N.A	N.A	N.A	N.A	N.A	-0.0133898	Jia-Dong Duan, Li-Sheng Wang, Kan Jiang, Xin-Xin Wang. Activity coefficients at infinite dilution of organic solutes in 1-octyl-3-methylimidazolium nitrate using gas–liquid chromatography. Fluid Phase Equilibria, 2012, 328 (3): 1-8
[C8MIm][NO3]	323.15	0.35	0.4	N.A	N.A	N.A	N.A	N.A	N.A	N.A	N.A	0.58	0.3613	0.4209	N.A	N.A	N.A	N.A	N.A	N.A	N.A	N.A	0.5803	0.0322857	0.05225	N.A	N.A	N.A	N.A	N.A	N.A	N.A	N.A	0.000517241	Jia-Dong Duan, Li-Sheng Wang, Kan Jiang, Xin-Xin Wang. Activity coefficients at infinite dilution of organic solutes in 1-octyl-3-methylimidazolium nitrate using gas–liquid chromatography. Fluid Phase Equilibria, 2012, 328 (3): 1-8
[C8MIm][NO3]	333.15	0.34	0.38	N.A	N.A	N.A	N.A	N.A	N.A	N.A	N.A	0.57	0.3728	0.4355	N.A	N.A	N.A	N.A	N.A	N.A	N.A	N.A	0.5775	0.0964706	0.146053	N.A	N.A	N.A	N.A	N.A	N.A	N.A	N.A	0.0131579	Jia-Dong Duan, Li-Sheng Wang, Kan Jiang, Xin-Xin Wang. Activity coefficients at infinite dilution of organic solutes in 1-octyl-3-methylimidazolium nitrate using gas–liquid chromatography. Fluid Phase Equilibria, 2012, 328 (3): 1-8
[C8MIm][NO3]	343.15	0.33	0.37	N.A	N.A	N.A	N.A	N.A	N.A	N.A	N.A	0.56	0.3837	0.4493	N.A	N.A	N.A	N.A	N.A	N.A	N.A	N.A	0.5739	0.162727	0.214324	N.A	N.A	N.A	N.A	N.A	N.A	N.A	N.A	0.0248214	Jia-Dong Duan, Li-Sheng Wang, Kan Jiang, Xin-Xin Wang. Activity coefficients at infinite dilution of organic solutes in 1-octyl-3-methylimidazolium nitrate using gas–liquid chromatography. Fluid Phase Equilibria, 2012, 328 (3): 1-8
[C8MIm][NO3]	353.15	0.31	0.36	N.A	N.A	N.A	N.A	N.A	N.A	N.A	N.A	0.55	0.3938	0.4624	N.A	N.A	N.A	N.A	N.A	N.A	N.A	N.A	0.5697	0.270323	0.284444	N.A	N.A	N.A	N.A	N.A	N.A	N.A	N.A	0.0358182	Jia-Dong Duan, Li-Sheng Wang, Kan Jiang, Xin-Xin Wang. Activity coefficients at infinite dilution of organic solutes in 1-octyl-3-methylimidazolium nitrate using gas–liquid chromatography. Fluid Phase Equilibria, 2012, 328 (3): 1-8
[C8MIm][NO3]	363.15	0.3	0.35	N.A	N.A	N.A	N.A	N.A	N.A	N.A	N.A	0.54	0.4033	0.4748	N.A	N.A	N.A	N.A	N.A	N.A	N.A	N.A	0.565	0.344333	0.356571	N.A	N.A	N.A	N.A	N.A	N.A	N.A	N.A	0.0462963	Jia-Dong Duan, Li-Sheng Wang, Kan Jiang, Xin-Xin Wang. Activity coefficients at infinite dilution of organic solutes in 1-octyl-3-methylimidazolium nitrate using gas–liquid chromatography. Fluid Phase Equilibria, 2012, 328 (3): 1-8
[CH3OC2N1,1,2][FAP]	318.15	2.38	3.08	3.95	1.52	3.78	2.34	1.6	7.38	10.7	15.8	0.285	1.995	2.436	3.044	0.728	1.655	1.043	0.7125	1.543	2.305	3.389	0.2849	-0.161765	-0.209091	-0.229367	-0.521053	-0.562169	-0.554274	-0.554688	-0.790921	-0.784579	-0.785506	-0.000350877	Andrzej Marciniak, Michał Wlazło. Activity coefficients at infinite dilution, physicochemical and thermodynamic properties for organic solutes and water in the ionic liquid ethyl-dimethyl-(2- trifluorotris-(perfluoroethyl)phosphatemethoxyethyl)ammonium. J. Chem. Thermodynamics, 2015, 89 (3-4): 245-250
[CH3OC2N1,1,2][FAP]	328.15	2.22	2.84	3.66	1.62	3.9	2.46	1.67	7.21	10.5	15.2	0.302	1.977	2.409	3.002	0.7601	1.688	1.085	0.7329	1.6	2.379	3.482	0.2997	-0.109459	-0.151761	-0.179781	-0.530802	-0.567179	-0.558943	-0.561138	-0.778086	-0.773429	-0.770921	-0.00761589	Andrzej Marciniak, Michał Wlazło. Activity coefficients at infinite dilution, physicochemical and thermodynamic properties for organic solutes and water in the ionic liquid ethyl-dimethyl-(2- trifluorotris-(perfluoroethyl)phosphatemethoxyethyl)ammonium. J. Chem. Thermodynamics, 2015, 89 (3-4): 245-250
[CH3OC2N1,1,2][FAP]	338.15	2.07	2.64	3.36	1.72	4.02	2.57	1.74	7.05	10.2	14.6	0.318	1.955	2.377	2.956	0.7911	1.718	1.125	0.7522	1.651	2.443	3.559	0.3142	-0.0555556	-0.0996212	-0.120238	-0.540058	-0.572637	-0.562257	-0.567701	-0.765816	-0.76049	-0.756233	-0.0119497	Andrzej Marciniak, Michał Wlazło. Activity coefficients at infinite dilution, physicochemical and thermodynamic properties for organic solutes and water in the ionic liquid ethyl-dimethyl-(2- trifluorotris-(perfluoroethyl)phosphatemethoxyethyl)ammonium. J. Chem. Thermodynamics, 2015, 89 (3-4): 245-250
[CH3OC2N1,1,2][FAP]	348.15	1.93	2.45	3.09	1.81	4.12	2.67	1.81	6.88	9.83	14	0.333	1.93	2.342	2.906	0.8207	1.744	1.163	0.7703	1.695	2.497	3.621	0.3283	0	-0.0440816	-0.0595469	-0.546575	-0.576699	-0.564419	-0.57442	-0.753634	-0.745982	-0.741357	-0.0141141	Andrzej Marciniak, Michał Wlazło. Activity coefficients at infinite dilution, physicochemical and thermodynamic properties for organic solutes and water in the ionic liquid ethyl-dimethyl-(2- trifluorotris-(perfluoroethyl)phosphatemethoxyethyl)ammonium. J. Chem. Thermodynamics, 2015, 89 (3-4): 245-250
[CH3OC2N1,1,2][FAP]	358.15	1.83	2.29	2.87	1.88	4.23	2.79	1.88	6.75	9.6	13.5	0.349	1.902	2.306	2.855	0.8491	1.769	1.2	0.7873	1.733	2.542	3.67	0.342	0.0393443	0.0069869	-0.00522648	-0.548351	-0.581797	-0.569892	-0.581223	-0.743259	-0.735208	-0.728148	-0.0200573	Andrzej Marciniak, Michał Wlazło. Activity coefficients at infinite dilution, physicochemical and thermodynamic properties for organic solutes and water in the ionic liquid ethyl-dimethyl-(2- trifluorotris-(perfluoroethyl)phosphatemethoxyethyl)ammonium. J. Chem. Thermodynamics, 2015, 89 (3-4): 245-250
[CH3OC2N1,1,2][FAP]	368.15	1.73	2.16	2.7	1.95	4.32	2.88	1.95	6.63	9.38	13.1	0.365	1.874	2.267	2.802	0.8763	1.79	1.234	0.8033	1.766	2.579	3.707	0.3554	0.083237	0.049537	0.0377778	-0.550615	-0.585648	-0.571528	-0.588051	-0.733635	-0.725053	-0.717023	-0.0263014	Andrzej Marciniak, Michał Wlazło. Activity coefficients at infinite dilution, physicochemical and thermodynamic properties for organic solutes and water in the ionic liquid ethyl-dimethyl-(2- trifluorotris-(perfluoroethyl)phosphatemethoxyethyl)ammonium. J. Chem. Thermodynamics, 2015, 89 (3-4): 245-250
[C5MPip][NTf2]	308.15	1.79	2.05	2.3	1.81	N.A	2.44	N.A	5.52	7.42	9.9	N.A	1.295	1.648	2.146	1.749	N.A	2.614	N.A	4.522	7.056	10.84	N.A	-0.276536	-0.196098	-0.0669565	-0.0337017	N.A	0.0713115	N.A	-0.180797	-0.0490566	0.0949495	N.A	Kamil Paduszyński, Urszula Domańska. Experimental and theoretical study on infinite dilution activity coefficients of various solutes in piperidinium ionic liquids. J. Chem. Thermodynamics, 2013 , 60 (60): 169-178
[C5MPip][NTf2]	318.15	1.58	1.82	2.16	1.85	N.A	2.47	N.A	5.31	7.12	9.65	N.A	1.258	1.595	2.069	1.776	N.A	2.642	N.A	4.386	6.804	10.39	N.A	-0.203797	-0.123626	-0.0421296	-0.04	N.A	0.0696356	N.A	-0.174011	-0.044382	0.0766839	N.A	Kamil Paduszyński, Urszula Domańska. Experimental and theoretical study on infinite dilution activity coefficients of various solutes in piperidinium ionic liquids. J. Chem. Thermodynamics, 2013 , 60 (60): 169-178
[C5MPip][NTf2]	328.15	1.46	1.68	1.98	1.86	N.A	2.5	N.A	5.13	6.88	9.28	N.A	1.224	1.547	1.999	1.8	N.A	2.665	N.A	4.26	6.568	9.968	N.A	-0.161644	-0.0791667	0.00959596	-0.0322581	N.A	0.066	N.A	-0.169591	-0.0453488	0.0741379	N.A	Kamil Paduszyński, Urszula Domańska. Experimental and theoretical study on infinite dilution activity coefficients of various solutes in piperidinium ionic liquids. J. Chem. Thermodynamics, 2013 , 60 (60): 169-178
[C5MPip][NTf2]	338.15	1.35	1.55	1.82	1.89	N.A	2.53	N.A	5	6.67	8.94	N.A	1.192	1.502	1.935	1.821	N.A	2.683	N.A	4.14	6.348	9.578	N.A	-0.117037	-0.0309677	0.0631868	-0.0365079	N.A	0.0604743	N.A	-0.172	-0.0482759	0.0713647	N.A	Kamil Paduszyński, Urszula Domańska. Experimental and theoretical study on infinite dilution activity coefficients of various solutes in piperidinium ionic liquids. J. Chem. Thermodynamics, 2013 , 60 (60): 169-178
[C5MPip][NTf2]	348.15	1.27	1.46	1.71	1.94	N.A	2.57	N.A	4.92	6.48	8.77	N.A	1.163	1.46	1.875	1.838	N.A	2.696	N.A	4.028	6.141	9.214	N.A	-0.084252	0	0.0964912	-0.0525773	N.A	0.0490272	N.A	-0.181301	-0.0523148	0.0506271	N.A	Kamil Paduszyński, Urszula Domańska. Experimental and theoretical study on infinite dilution activity coefficients of various solutes in piperidinium ionic liquids. J. Chem. Thermodynamics, 2013 , 60 (60): 169-178
[C5MPip][NTf2]	358.15	1.18	1.36	1.57	1.98	N.A	2.6	N.A	4.8	6.31	8.47	N.A	1.135	1.422	1.82	1.853	N.A	2.706	N.A	3.922	5.947	8.874	N.A	-0.0381356	0.0455882	0.159236	-0.0641414	N.A	0.0407692	N.A	-0.182917	-0.0575277	0.0476978	N.A	Kamil Paduszyński, Urszula Domańska. Experimental and theoretical study on infinite dilution activity coefficients of various solutes in piperidinium ionic liquids. J. Chem. Thermodynamics, 2013 , 60 (60): 169-178
[CH3CH(CH3)N1,1,3][NTf2]	323.15	1.767	2.196	2.865	N.A	N.A	N.A	2.733	9.069	N.A	N.A	0.515	1.735	1.929	2.193	N.A	N.A	N.A	1.078	1.97	N.A	N.A	0.5172	-0.0181098	-0.121585	-0.234555	N.A	N.A	N.A	-0.605562	-0.782776	N.A	N.A	0.00427184	Fabrice Mutelet, Dominique Alonso, Sudhir Ravula, Gary A. Baker, Bihan Jiang, William E. Acree Jr. Infinite dilution activity coefficients of solutes dissolved in anhydrous alkyl(dimethyl)isopropylammonium bis(trifluoromethylsulfonyl)imide ionic liquids containing functionalized- and nonfunctionalized-alkyl chains. Journal of Molecular Liquids, 2016, 222: 295-312
[CH3CH(CH3)N1,1,3][NTf2]	333.15	1.631	1.999	2.35	N.A	N.A	N.A	2.728	8.617	N.A	N.A	0.515	1.675	1.861	2.115	N.A	N.A	N.A	1.092	1.941	N.A	N.A	0.5213	0.0269773	-0.0690345	-0.1	N.A	N.A	N.A	-0.599707	-0.774748	N.A	N.A	0.012233	Fabrice Mutelet, Dominique Alonso, Sudhir Ravula, Gary A. Baker, Bihan Jiang, William E. Acree Jr. Infinite dilution activity coefficients of solutes dissolved in anhydrous alkyl(dimethyl)isopropylammonium bis(trifluoromethylsulfonyl)imide ionic liquids containing functionalized- and nonfunctionalized-alkyl chains. Journal of Molecular Liquids, 2016, 222: 295-312
[CH3CH(CH3)N1,1,3][NTf2]	343.15	1.493	1.834	2.151	N.A	N.A	N.A	2.718	8.174	N.A	N.A	0.515	1.621	1.8	2.044	N.A	N.A	N.A	1.105	1.914	N.A	N.A	0.525	0.0857334	-0.0185387	-0.0497443	N.A	N.A	N.A	-0.593451	-0.765843	N.A	N.A	0.0194175	Fabrice Mutelet, Dominique Alonso, Sudhir Ravula, Gary A. Baker, Bihan Jiang, William E. Acree Jr. Infinite dilution activity coefficients of solutes dissolved in anhydrous alkyl(dimethyl)isopropylammonium bis(trifluoromethylsulfonyl)imide ionic liquids containing functionalized- and nonfunctionalized-alkyl chains. Journal of Molecular Liquids, 2016, 222: 295-312
[CH3CH(CH3)N1,1,3][NTf2]	353.15	1.396	1.682	2.017	N.A	N.A	N.A	2.712	7.776	N.A	N.A	0.516	1.571	1.745	1.98	N.A	N.A	N.A	1.116	1.888	N.A	N.A	0.5281	0.125358	0.0374554	-0.0183441	N.A	N.A	N.A	-0.588496	-0.757202	N.A	N.A	0.0234496	Fabrice Mutelet, Dominique Alonso, Sudhir Ravula, Gary A. Baker, Bihan Jiang, William E. Acree Jr. Infinite dilution activity coefficients of solutes dissolved in anhydrous alkyl(dimethyl)isopropylammonium bis(trifluoromethylsulfonyl)imide ionic liquids containing functionalized- and nonfunctionalized-alkyl chains. Journal of Molecular Liquids, 2016, 222: 295-312
[CH3CH(CH3)N1,1,3][NTf2]	363.15	1.298	1.556	1.861	N.A	N.A	N.A	2.705	7.436	N.A	N.A	0.515	1.526	1.694	1.922	N.A	N.A	N.A	1.127	1.864	N.A	N.A	0.5309	0.175655	0.0886889	0.0327781	N.A	N.A	N.A	-0.583364	-0.749328	N.A	N.A	0.0308738	Fabrice Mutelet, Dominique Alonso, Sudhir Ravula, Gary A. Baker, Bihan Jiang, William E. Acree Jr. Infinite dilution activity coefficients of solutes dissolved in anhydrous alkyl(dimethyl)isopropylammonium bis(trifluoromethylsulfonyl)imide ionic liquids containing functionalized- and nonfunctionalized-alkyl chains. Journal of Molecular Liquids, 2016, 222: 295-312
[CH3CH(CH3)N1,1,6][NTf2]	323.15	1.507	1.815	2.143	N.A	N.A	N.A	N.A	4.921	N.A	N.A	0.503	1.606	1.723	1.892	N.A	N.A	N.A	N.A	1.379	N.A	N.A	0.5177	0.0656934	-0.0506887	-0.117126	N.A	N.A	N.A	N.A	-0.719772	N.A	N.A	0.0292247	Fabrice Mutelet, Dominique Alonso, Sudhir Ravula, Gary A. Baker, Bihan Jiang, William E. Acree Jr. Infinite dilution activity coefficients of solutes dissolved in anhydrous alkyl(dimethyl)isopropylammonium bis(trifluoromethylsulfonyl)imide ionic liquids containing functionalized- and nonfunctionalized-alkyl chains. Journal of Molecular Liquids, 2016, 222: 295-312
[CH3CH(CH3)N1,1,6][NTf2]	333.15	1.422	1.651	1.934	N.A	N.A	N.A	N.A	4.762	N.A	N.A	0.502	1.549	1.663	1.825	N.A	N.A	N.A	N.A	1.364	N.A	N.A	0.521	0.0893108	0.00726832	-0.0563599	N.A	N.A	N.A	N.A	-0.713566	N.A	N.A	0.0378486	Fabrice Mutelet, Dominique Alonso, Sudhir Ravula, Gary A. Baker, Bihan Jiang, William E. Acree Jr. Infinite dilution activity coefficients of solutes dissolved in anhydrous alkyl(dimethyl)isopropylammonium bis(trifluoromethylsulfonyl)imide ionic liquids containing functionalized- and nonfunctionalized-alkyl chains. Journal of Molecular Liquids, 2016, 222: 295-312
[CH3CH(CH3)N1,1,6][NTf2]	343.15	1.342	1.514	1.78	N.A	N.A	N.A	N.A	4.599	N.A	N.A	0.5	1.498	1.608	1.764	N.A	N.A	N.A	N.A	1.349	N.A	N.A	0.5238	0.116244	0.0620872	-0.00898876	N.A	N.A	N.A	N.A	-0.706675	N.A	N.A	0.0476	Fabrice Mutelet, Dominique Alonso, Sudhir Ravula, Gary A. Baker, Bihan Jiang, William E. Acree Jr. Infinite dilution activity coefficients of solutes dissolved in anhydrous alkyl(dimethyl)isopropylammonium bis(trifluoromethylsulfonyl)imide ionic liquids containing functionalized- and nonfunctionalized-alkyl chains. Journal of Molecular Liquids, 2016, 222: 295-312
[CH3CH(CH3)N1,1,6][NTf2]	353.15	1.274	1.406	1.679	N.A	N.A	N.A	N.A	4.501	N.A	N.A	0.498	1.451	1.558	1.709	N.A	N.A	N.A	N.A	1.335	N.A	N.A	0.5261	0.138932	0.108108	0.0178678	N.A	N.A	N.A	N.A	-0.703399	N.A	N.A	0.0564257	Fabrice Mutelet, Dominique Alonso, Sudhir Ravula, Gary A. Baker, Bihan Jiang, William E. Acree Jr. Infinite dilution activity coefficients of solutes dissolved in anhydrous alkyl(dimethyl)isopropylammonium bis(trifluoromethylsulfonyl)imide ionic liquids containing functionalized- and nonfunctionalized-alkyl chains. Journal of Molecular Liquids, 2016, 222: 295-312
[CH3CH(CH3)N1,1,6][NTf2]	363.15	1.193	1.288	1.575	N.A	N.A	N.A	N.A	4.463	N.A	N.A	0.496	1.407	1.512	1.659	N.A	N.A	N.A	N.A	1.322	N.A	N.A	0.528	0.17938	0.173913	0.0533333	N.A	N.A	N.A	N.A	-0.703787	N.A	N.A	0.0645161	Fabrice Mutelet, Dominique Alonso, Sudhir Ravula, Gary A. Baker, Bihan Jiang, William E. Acree Jr. Infinite dilution activity coefficients of solutes dissolved in anhydrous alkyl(dimethyl)isopropylammonium bis(trifluoromethylsulfonyl)imide ionic liquids containing functionalized- and nonfunctionalized-alkyl chains. Journal of Molecular Liquids, 2016, 222: 295-312
[CH3CH(CH3)N1,1,C2OH][NTf2]	323.15	0.994	1.334	1.88	N.A	N.A	N.A	2.298	16.014	N.A	N.A	0.412	1.046	1.26	1.553	N.A	N.A	N.A	1.33	3.469	N.A	N.A	0.4076	0.0523139	-0.0554723	-0.173936	N.A	N.A	N.A	-0.421236	-0.783377	N.A	N.A	-0.0106796	Fabrice Mutelet, Dominique Alonso, Sudhir Ravula, Gary A. Baker, Bihan Jiang, William E. Acree Jr. Infinite dilution activity coefficients of solutes dissolved in anhydrous alkyl(dimethyl)isopropylammonium bis(trifluoromethylsulfonyl)imide ionic liquids containing functionalized- and nonfunctionalized-alkyl chains. Journal of Molecular Liquids, 2016, 222: 295-312
[CH3CH(CH3)N1,1,C2OH][NTf2]	333.15	0.956	1.274	1.732	N.A	N.A	N.A	2.328	14.451	N.A	N.A	0.414	1.03	1.239	1.524	N.A	N.A	N.A	1.343	3.385	N.A	N.A	0.4115	0.0774059	-0.0274725	-0.120092	N.A	N.A	N.A	-0.42311	-0.76576	N.A	N.A	-0.00603865	Fabrice Mutelet, Dominique Alonso, Sudhir Ravula, Gary A. Baker, Bihan Jiang, William E. Acree Jr. Infinite dilution activity coefficients of solutes dissolved in anhydrous alkyl(dimethyl)isopropylammonium bis(trifluoromethylsulfonyl)imide ionic liquids containing functionalized- and nonfunctionalized-alkyl chains. Journal of Molecular Liquids, 2016, 222: 295-312
[CH3CH(CH3)N1,1,C2OH][NTf2]	343.15	0.925	1.218	1.653	N.A	N.A	N.A	2.363	13.609	N.A	N.A	0.419	1.014	1.219	1.497	N.A	N.A	N.A	1.354	3.307	N.A	N.A	0.4152	0.0962162	0.000821018	-0.0943739	N.A	N.A	N.A	-0.427	-0.756999	N.A	N.A	-0.00906921	Fabrice Mutelet, Dominique Alonso, Sudhir Ravula, Gary A. Baker, Bihan Jiang, William E. Acree Jr. Infinite dilution activity coefficients of solutes dissolved in anhydrous alkyl(dimethyl)isopropylammonium bis(trifluoromethylsulfonyl)imide ionic liquids containing functionalized- and nonfunctionalized-alkyl chains. Journal of Molecular Liquids, 2016, 222: 295-312
[CH3CH(CH3)N1,1,C2OH][NTf2]	353.15	0.908	1.175	1.599	N.A	N.A	N.A	2.385	12.579	N.A	N.A	0.425	0.9995	1.2	1.472	N.A	N.A	N.A	1.364	3.234	N.A	N.A	0.4185	0.100771	0.0212766	-0.0794246	N.A	N.A	N.A	-0.428092	-0.742905	N.A	N.A	-0.0152941	Fabrice Mutelet, Dominique Alonso, Sudhir Ravula, Gary A. Baker, Bihan Jiang, William E. Acree Jr. Infinite dilution activity coefficients of solutes dissolved in anhydrous alkyl(dimethyl)isopropylammonium bis(trifluoromethylsulfonyl)imide ionic liquids containing functionalized- and nonfunctionalized-alkyl chains. Journal of Molecular Liquids, 2016, 222: 295-312
[CH3CH(CH3)N1,1,C2OH][NTf2]	363.15	0.874	1.099	1.528	N.A	N.A	N.A	2.4	11.66	N.A	N.A	0.427	0.9858	1.182	1.448	N.A	N.A	N.A	1.373	3.165	N.A	N.A	0.4216	0.127918	0.0755232	-0.052356	N.A	N.A	N.A	-0.427917	-0.728559	N.A	N.A	-0.0126464	Fabrice Mutelet, Dominique Alonso, Sudhir Ravula, Gary A. Baker, Bihan Jiang, William E. Acree Jr. Infinite dilution activity coefficients of solutes dissolved in anhydrous alkyl(dimethyl)isopropylammonium bis(trifluoromethylsulfonyl)imide ionic liquids containing functionalized- and nonfunctionalized-alkyl chains. Journal of Molecular Liquids, 2016, 222: 295-312
[CH3CH(CH3)N1,1,CH2CN][NTf2]	313.15	2.097	2.971	4.575	N.A	N.A	N.A	5.337	29.129	N.A	N.A	0.474	1.706	2.095	2.633	N.A	N.A	N.A	1.595	3.74	N.A	N.A	0.4518	-0.186457	-0.29485	-0.424481	N.A	N.A	N.A	-0.701143	-0.871606	N.A	N.A	-0.0468354	Fabrice Mutelet, Dominique Alonso, Sudhir Ravula, Gary A. Baker, Bihan Jiang, William E. Acree Jr. Infinite dilution activity coefficients of solutes dissolved in anhydrous alkyl(dimethyl)isopropylammonium bis(trifluoromethylsulfonyl)imide ionic liquids containing functionalized- and nonfunctionalized-alkyl chains. Journal of Molecular Liquids, 2016, 222: 295-312
[CH3CH(CH3)N1,1,CH2CN][NTf2]	323.15	1.916	2.72	3.931	N.A	N.A	N.A	5.004	24.792	N.A	N.A	0.473	1.65	2.023	2.537	N.A	N.A	N.A	1.612	3.663	N.A	N.A	0.4553	-0.138831	-0.25625	-0.354617	N.A	N.A	N.A	-0.677858	-0.852251	N.A	N.A	-0.0374207	Fabrice Mutelet, Dominique Alonso, Sudhir Ravula, Gary A. Baker, Bihan Jiang, William E. Acree Jr. Infinite dilution activity coefficients of solutes dissolved in anhydrous alkyl(dimethyl)isopropylammonium bis(trifluoromethylsulfonyl)imide ionic liquids containing functionalized- and nonfunctionalized-alkyl chains. Journal of Molecular Liquids, 2016, 222: 295-312
[CH3CH(CH3)N1,1,CH2CN][NTf2]	333.15	1.757	2.458	3.484	N.A	N.A	N.A	4.827	24.346	N.A	N.A	0.475	1.599	1.958	2.451	N.A	N.A	N.A	1.627	3.589	N.A	N.A	0.4585	-0.089926	-0.203417	-0.296498	N.A	N.A	N.A	-0.662938	-0.852584	N.A	N.A	-0.0347368	Fabrice Mutelet, Dominique Alonso, Sudhir Ravula, Gary A. Baker, Bihan Jiang, William E. Acree Jr. Infinite dilution activity coefficients of solutes dissolved in anhydrous alkyl(dimethyl)isopropylammonium bis(trifluoromethylsulfonyl)imide ionic liquids containing functionalized- and nonfunctionalized-alkyl chains. Journal of Molecular Liquids, 2016, 222: 295-312
[CH3CH(CH3)N1,1,CH2CN][NTf2]	343.15	1.633	2.263	3.194	N.A	N.A	N.A	4.781	21.151	N.A	N.A	0.481	1.553	1.899	2.373	N.A	N.A	N.A	1.64	3.52	N.A	N.A	0.4613	-0.0489896	-0.160848	-0.257044	N.A	N.A	N.A	-0.656976	-0.833578	N.A	N.A	-0.0409563	Fabrice Mutelet, Dominique Alonso, Sudhir Ravula, Gary A. Baker, Bihan Jiang, William E. Acree Jr. Infinite dilution activity coefficients of solutes dissolved in anhydrous alkyl(dimethyl)isopropylammonium bis(trifluoromethylsulfonyl)imide ionic liquids containing functionalized- and nonfunctionalized-alkyl chains. Journal of Molecular Liquids, 2016, 222: 295-312
[CH3CH(CH3)N1,1,CH2CN][NTf2]	353.15	1.53	2.088	2.986	N.A	N.A	N.A	4.574	20.109	N.A	N.A	0.488	1.51	1.845	2.302	N.A	N.A	N.A	1.652	3.454	N.A	N.A	0.4639	-0.0130719	-0.116379	-0.229069	N.A	N.A	N.A	-0.638828	-0.828236	N.A	N.A	-0.0493852	Fabrice Mutelet, Dominique Alonso, Sudhir Ravula, Gary A. Baker, Bihan Jiang, William E. Acree Jr. Infinite dilution activity coefficients of solutes dissolved in anhydrous alkyl(dimethyl)isopropylammonium bis(trifluoromethylsulfonyl)imide ionic liquids containing functionalized- and nonfunctionalized-alkyl chains. Journal of Molecular Liquids, 2016, 222: 295-312
[CH3CH(CH3)N1,1,CH2CN][NTf2]	363.15	1.42	1.938	2.804	N.A	N.A	N.A	N.A	N.A	N.A	N.A	0.497	1.471	1.795	2.237	N.A	N.A	N.A	N.A	N.A	N.A	N.A	0.4662	0.0359155	-0.0737874	-0.202211	N.A	N.A	N.A	N.A	N.A	N.A	N.A	-0.0619718	Fabrice Mutelet, Dominique Alonso, Sudhir Ravula, Gary A. Baker, Bihan Jiang, William E. Acree Jr. Infinite dilution activity coefficients of solutes dissolved in anhydrous alkyl(dimethyl)isopropylammonium bis(trifluoromethylsulfonyl)imide ionic liquids containing functionalized- and nonfunctionalized-alkyl chains. Journal of Molecular Liquids, 2016, 222: 295-312
[C6MIm][B(CN)4]	318.15	1.05	1.19	1.43	1.62	3.51	2.19	1.59	6.13	8.39	11.7	0.387	0.8192	1.005	1.262	1.491	3.198	2.147	1.319	4.522	6.79	10.03	0.387	-0.21981	-0.155462	-0.117483	-0.0796296	-0.0888889	-0.0196347	-0.17044	-0.262316	-0.190703	-0.142735	0	Urszula Domańska, Elena Vadimovna Lukoshko, Michał Wlazło. Measurements of activity coefficients at infinite dilution for organic solutes and water in the ionic liquid 1-hexyl-3-methylimidazolium tetracyanoborate. J. Chem. Thermodynamics, 2012, 47: 389–396
[C6MIm][B(CN)4]	328.15	0.978	1.1	1.32	1.66	3.53	2.24	1.62	5.88	8.06	11.1	0.391	0.8224	1.013	1.277	1.551	3.311	2.239	1.359	4.551	6.842	10.12	0.3906	-0.1591	-0.0790909	-0.0325758	-0.0656627	-0.0620397	-0.000446429	-0.161111	-0.22602	-0.151117	-0.0882883	-0.00102302	Urszula Domańska, Elena Vadimovna Lukoshko, Michał Wlazło. Measurements of activity coefficients at infinite dilution for organic solutes and water in the ionic liquid 1-hexyl-3-methylimidazolium tetracyanoborate. J. Chem. Thermodynamics, 2012, 47: 389–396
[C6MIm][B(CN)4]	338.15	0.912	1.02	1.22	1.71	3.53	2.27	1.64	5.71	7.79	10.7	0.394	0.8252	1.021	1.291	1.609	3.418	2.327	1.398	4.575	6.887	10.2	0.3936	-0.0951754	0.000980392	0.0581967	-0.0590643	-0.031728	0.0251101	-0.147561	-0.198774	-0.115918	-0.046729	-0.00101523	Urszula Domańska, Elena Vadimovna Lukoshko, Michał Wlazło. Measurements of activity coefficients at infinite dilution for organic solutes and water in the ionic liquid 1-hexyl-3-methylimidazolium tetracyanoborate. J. Chem. Thermodynamics, 2012, 47: 389–396
[C6MIm][B(CN)4]	348.15	0.855	0.965	1.14	1.76	3.58	2.33	1.68	5.58	7.59	10.3	0.396	0.8279	1.028	1.304	1.663	3.52	2.412	1.434	4.595	6.924	10.27	0.3961	-0.0316959	0.065285	0.14386	-0.0551136	-0.0167598	0.0351931	-0.146429	-0.176523	-0.087747	-0.00291262	0.000252525	Urszula Domańska, Elena Vadimovna Lukoshko, Michał Wlazło. Measurements of activity coefficients at infinite dilution for organic solutes and water in the ionic liquid 1-hexyl-3-methylimidazolium tetracyanoborate. J. Chem. Thermodynamics, 2012, 47: 389–396
[C6MIm][B(CN)4]	358.15	0.807	0.913	1.07	1.81	3.61	2.36	1.71	5.44	7.37	9.91	0.398	0.8302	1.035	1.317	1.716	3.617	2.492	1.468	4.611	6.955	10.32	0.3981	0.0287485	0.133625	0.230841	-0.0519337	0.00193906	0.0559322	-0.14152	-0.15239	-0.0563094	0.0413724	0.000251256	Urszula Domańska, Elena Vadimovna Lukoshko, Michał Wlazło. Measurements of activity coefficients at infinite dilution for organic solutes and water in the ionic liquid 1-hexyl-3-methylimidazolium tetracyanoborate. J. Chem. Thermodynamics, 2012, 47: 389–396
[C6MIm][B(CN)4]	368.15	0.761	0.864	1.01	1.87	3.65	2.42	1.76	5.35	7.24	9.64	0.4	0.8324	1.041	1.33	1.765	3.709	2.57	1.501	4.623	6.98	10.37	0.3997	0.0938239	0.204861	0.316832	-0.0561497	0.0161644	0.0619835	-0.147159	-0.135888	-0.0359116	0.0757261	-0.00075	Urszula Domańska, Elena Vadimovna Lukoshko, Michał Wlazło. Measurements of activity coefficients at infinite dilution for organic solutes and water in the ionic liquid 1-hexyl-3-methylimidazolium tetracyanoborate. J. Chem. Thermodynamics, 2012, 47: 389–396
[C4MIm][Cl]	358.15	N.A	N.A	N.A	24.61	64.78	33.96	19.27	61.71	88.9	141.84	1.12	N.A	N.A	N.A	7.196	9.753	9.681	4.569	13.51	18.87	25.93	1.175	N.A	N.A	N.A	-0.707599	-0.849444	-0.714929	-0.762896	-0.781073	-0.787739	-0.817188	0.0491071	Mónia A.R. Martins, João A.P. Coutinho, Simão P. Pinho, Urszula Domanńska. Measurements of activity coefficients at infinite dilution of organic solutes and water on polar imidazolium-based ionic liquids. J. Chem. Thermodynamics, 2015, 91: 194–203
[C4MIm][Cl]	368.15	N.A	N.A	N.A	23.8	59.34	33.14	18.93	57.87	83.76	134.44	1.16	N.A	N.A	N.A	7.266	9.871	9.795	4.608	13.39	18.72	25.76	1.16	N.A	N.A	N.A	-0.694706	-0.833654	-0.704436	-0.756577	-0.768619	-0.776504	-0.80839	0	Mónia A.R. Martins, João A.P. Coutinho, Simão P. Pinho, Urszula Domanńska. Measurements of activity coefficients at infinite dilution of organic solutes and water on polar imidazolium-based ionic liquids. J. Chem. Thermodynamics, 2015, 91: 194–203
[C4MIm][Cl]	378.15	N.A	N.A	N.A	23.02	55.67	32.18	18.36	53.94	79.33	125.75	1.21	N.A	N.A	N.A	7.33	9.979	9.9	4.644	13.27	18.58	25.58	1.145	N.A	N.A	N.A	-0.681581	-0.820747	-0.692356	-0.747059	-0.753986	-0.765788	-0.796581	-0.053719	Mónia A.R. Martins, João A.P. Coutinho, Simão P. Pinho, Urszula Domanńska. Measurements of activity coefficients at infinite dilution of organic solutes and water on polar imidazolium-based ionic liquids. J. Chem. Thermodynamics, 2015, 91: 194–203
[C4MIm][Cl]	388.15	N.A	N.A	N.A	22.85	53.32	32.06	18.39	51.97	77.17	122.5	1.28	N.A	N.A	N.A	7.39	10.08	9.998	4.677	13.16	18.43	25.41	1.129	N.A	N.A	N.A	-0.676586	-0.810953	-0.688147	-0.745677	-0.746777	-0.761177	-0.792571	-0.117969	Mónia A.R. Martins, João A.P. Coutinho, Simão P. Pinho, Urszula Domanńska. Measurements of activity coefficients at infinite dilution of organic solutes and water on polar imidazolium-based ionic liquids. J. Chem. Thermodynamics, 2015, 91: 194–203
[C4MIm][Cl]	398.15	0.297	0.408	0.558	N.A	N.A	N.A	N.A	N.A	N.A	N.A	N.A	0.3484	0.4079	0.4872	N.A	N.A	N.A	N.A	N.A	N.A	N.A	N.A	0.173064	-0.000245098	-0.126882	N.A	N.A	N.A	N.A	N.A	N.A	N.A	N.A	Mónia A.R. Martins, João A.P. Coutinho, Simão P. Pinho, Urszula Domanńska. Measurements of activity coefficients at infinite dilution of organic solutes and water on polar imidazolium-based ionic liquids. J. Chem. Thermodynamics, 2015, 91: 194–203
[C4MIm][Cl]	408.15	0.313	0.434	0.594	N.A	N.A	N.A	N.A	N.A	N.A	N.A	N.A	0.3711	0.4359	0.5222	N.A	N.A	N.A	N.A	N.A	N.A	N.A	N.A	0.185623	0.00437788	-0.120875	N.A	N.A	N.A	N.A	N.A	N.A	N.A	N.A	Mónia A.R. Martins, João A.P. Coutinho, Simão P. Pinho, Urszula Domanńska. Measurements of activity coefficients at infinite dilution of organic solutes and water on polar imidazolium-based ionic liquids. J. Chem. Thermodynamics, 2015, 91: 194–203
[C4MIm][Cl]	418.15	0.332	0.464	0.635	N.A	N.A	N.A	N.A	N.A	N.A	N.A	N.A	0.3938	0.464	0.5574	N.A	N.A	N.A	N.A	N.A	N.A	N.A	N.A	0.186145	0	-0.122205	N.A	N.A	N.A	N.A	N.A	N.A	N.A	N.A	Mónia A.R. Martins, João A.P. Coutinho, Simão P. Pinho, Urszula Domanńska. Measurements of activity coefficients at infinite dilution of organic solutes and water on polar imidazolium-based ionic liquids. J. Chem. Thermodynamics, 2015, 91: 194–203
[C4MIm][Cl]	428.15	0.353	0.501	0.68	N.A	N.A	N.A	N.A	N.A	N.A	N.A	N.A	0.4163	0.4921	0.5928	N.A	N.A	N.A	N.A	N.A	N.A	N.A	N.A	0.17932	-0.0177645	-0.128235	N.A	N.A	N.A	N.A	N.A	N.A	N.A	N.A	Mónia A.R. Martins, João A.P. Coutinho, Simão P. Pinho, Urszula Domanńska. Measurements of activity coefficients at infinite dilution of organic solutes and water on polar imidazolium-based ionic liquids. J. Chem. Thermodynamics, 2015, 91: 194–203
[C4MIm][CH3SO3]	358.15	N.A	N.A	N.A	16.97	35.29	23.82	14.69	39.66	59.23	88.06	0.99	N.A	N.A	N.A	10.61	22.87	17.96	6.642	18.75	32.96	56.99	0.8117	N.A	N.A	N.A	-0.374779	-0.351941	-0.246012	-0.547856	-0.527231	-0.443525	-0.352828	-0.180101	Mónia A.R. Martins, João A.P. Coutinho, Simão P. Pinho, Urszula Domanńska. Measurements of activity coefficients at infinite dilution of organic solutes and water on polar imidazolium-based ionic liquids. J. Chem. Thermodynamics, 2015, 91: 194–203
[C4MIm][CH3SO3]	368.15	N.A	N.A	N.A	17.39	35.59	24.18	14.91	39.99	28.91	86.76	1.03	N.A	N.A	N.A	10.69	22.95	18.09	6.676	18.64	32.72	56.51	0.8186	N.A	N.A	N.A	-0.385279	-0.355156	-0.251861	-0.552247	-0.533883	0.131788	-0.348663	-0.205243	Mónia A.R. Martins, João A.P. Coutinho, Simão P. Pinho, Urszula Domanńska. Measurements of activity coefficients at infinite dilution of organic solutes and water on polar imidazolium-based ionic liquids. J. Chem. Thermodynamics, 2015, 91: 194–203
[C4MIm][CH3SO3]	378.15	N.A	N.A	N.A	17.9	36.1	24.67	14.98	40.01	58.68	86.48	1.08	N.A	N.A	N.A	10.76	23.02	18.2	6.707	18.53	32.48	56.02	0.8249	N.A	N.A	N.A	-0.398883	-0.362327	-0.262262	-0.55227	-0.536866	-0.446489	-0.35222	-0.236204	Mónia A.R. Martins, João A.P. Coutinho, Simão P. Pinho, Urszula Domanńska. Measurements of activity coefficients at infinite dilution of organic solutes and water on polar imidazolium-based ionic liquids. J. Chem. Thermodynamics, 2015, 91: 194–203
[C4MIm][CH3SO3]	388.15	N.A	N.A	N.A	18.55	36.62	25.26	15.32	40.26	58.03	85.64	1.12	N.A	N.A	N.A	10.83	23.07	18.31	6.734	18.42	32.24	55.52	0.8308	N.A	N.A	N.A	-0.416173	-0.370016	-0.275139	-0.560444	-0.542474	-0.444425	-0.351705	-0.258214	Mónia A.R. Martins, João A.P. Coutinho, Simão P. Pinho, Urszula Domanńska. Measurements of activity coefficients at infinite dilution of organic solutes and water on polar imidazolium-based ionic liquids. J. Chem. Thermodynamics, 2015, 91: 194–203
[C4MIm][CH3SO3]	398.15	0.533	0.711	0.937	N.A	N.A	N.A	N.A	N.A	N.A	N.A	N.A	0.4381	0.6395	0.9525	N.A	N.A	N.A	N.A	N.A	N.A	N.A	N.A	-0.178049	-0.100563	0.0165422	N.A	N.A	N.A	N.A	N.A	N.A	N.A	N.A	Mónia A.R. Martins, João A.P. Coutinho, Simão P. Pinho, Urszula Domanńska. Measurements of activity coefficients at infinite dilution of organic solutes and water on polar imidazolium-based ionic liquids. J. Chem. Thermodynamics, 2015, 91: 194–203
[C4MIm][CH3SO3]	408.15	0.553	0.744	0.984	N.A	N.A	N.A	N.A	N.A	N.A	N.A	N.A	0.4634	0.6773	1.01	N.A	N.A	N.A	N.A	N.A	N.A	N.A	N.A	-0.162025	-0.0896505	0.0264228	N.A	N.A	N.A	N.A	N.A	N.A	N.A	N.A	Mónia A.R. Martins, João A.P. Coutinho, Simão P. Pinho, Urszula Domanńska. Measurements of activity coefficients at infinite dilution of organic solutes and water on polar imidazolium-based ionic liquids. J. Chem. Thermodynamics, 2015, 91: 194–203
[C4MIm][CH3SO3]	418.15	0.576	0.783	1.024	N.A	N.A	N.A	N.A	N.A	N.A	N.A	N.A	0.4887	0.7152	1.067	N.A	N.A	N.A	N.A	N.A	N.A	N.A	N.A	-0.151562	-0.08659	0.0419922	N.A	N.A	N.A	N.A	N.A	N.A	N.A	N.A	Mónia A.R. Martins, João A.P. Coutinho, Simão P. Pinho, Urszula Domanńska. Measurements of activity coefficients at infinite dilution of organic solutes and water on polar imidazolium-based ionic liquids. J. Chem. Thermodynamics, 2015, 91: 194–203
[C4MIm][CH3SO3]	428.15	0.599	0.823	7.071	N.A	N.A	N.A	N.A	N.A	N.A	N.A	N.A	0.514	0.7532	1.125	N.A	N.A	N.A	N.A	N.A	N.A	N.A	N.A	-0.141903	-0.0848117	-0.840899	N.A	N.A	N.A	N.A	N.A	N.A	N.A	N.A	Mónia A.R. Martins, João A.P. Coutinho, Simão P. Pinho, Urszula Domanńska. Measurements of activity coefficients at infinite dilution of organic solutes and water on polar imidazolium-based ionic liquids. J. Chem. Thermodynamics, 2015, 91: 194–203
[CH3OC2N1,2,2][NTf2]	318.15	1.77	2.26	2.96	2.62	6.09	N.A	2.62	9.21	13.3	19.6	0.488	1.524	1.765	2.092	1.49	2.493	N.A	1.211	2.381	3.374	4.706	0.4511	-0.138983	-0.219027	-0.293243	-0.431298	-0.59064	N.A	-0.537786	-0.741477	-0.746316	-0.759898	-0.0756148	Marek Królikowski, Marta Królikowska, Cezary Wiśniewski. Separation of aliphatic from aromatic hydrocarbons and sulphur compounds from fuel based on measurements of activity coefficients at infinite dilution for organic N,N-diethyl-N-methyl-N-(2-methoxy-ethyl)ammonium bis solutes and water in the ionic liquid (trifluoromethylsulfonyl)imide. J. Chem. Thermodynamics, 2015, 91: 194–203
[CH3OC2N1,2,2][NTf2]	328.15	1.62	2.04	2.63	2.6	5.94	N.A	2.6	8.78	12.6	18.3	0.488	1.468	1.697	2.007	1.511	2.491	N.A	1.22	2.327	3.283	4.558	0.4536	-0.0938272	-0.168137	-0.236882	-0.418846	-0.58064	N.A	-0.530769	-0.734966	-0.739444	-0.750929	-0.0704918	Marek Królikowski, Marta Królikowska, Cezary Wiśniewski. Separation of aliphatic from aromatic hydrocarbons and sulphur compounds from fuel based on measurements of activity coefficients at infinite dilution for organic N,N-diethyl-N-methyl-N-(2-methoxy-ethyl)ammonium bis solutes and water in the ionic liquid (trifluoromethylsulfonyl)imide. J. Chem. Thermodynamics, 2015, 91: 194–203
[CH3OC2N1,2,2][NTf2]	338.15	1.5	1.87	2.39	2.6	5.86	N.A	2.6	8.33	11.9	17.1	0.488	1.417	1.636	1.93	1.529	2.487	N.A	1.228	2.277	3.198	4.421	0.4558	-0.0553333	-0.125134	-0.192469	-0.411923	-0.575597	N.A	-0.527692	-0.726651	-0.731261	-0.741462	-0.0659836	Marek Królikowski, Marta Królikowska, Cezary Wiśniewski. Separation of aliphatic from aromatic hydrocarbons and sulphur compounds from fuel based on measurements of activity coefficients at infinite dilution for organic N,N-diethyl-N-methyl-N-(2-methoxy-ethyl)ammonium bis solutes and water in the ionic liquid (trifluoromethylsulfonyl)imide. J. Chem. Thermodynamics, 2015, 91: 194–203
[CH3OC2N1,2,2][NTf2]	348.15	1.38	1.72	2.18	2.59	5.71	N.A	2.59	8.07	11.4	16.2	0.49	1.371	1.58	1.861	1.545	2.482	N.A	1.234	2.229	3.119	4.293	0.4576	-0.00652174	-0.0813953	-0.14633	-0.403475	-0.565324	N.A	-0.523552	-0.723792	-0.726404	-0.735	-0.0661224	Marek Królikowski, Marta Królikowska, Cezary Wiśniewski. Separation of aliphatic from aromatic hydrocarbons and sulphur compounds from fuel based on measurements of activity coefficients at infinite dilution for organic N,N-diethyl-N-methyl-N-(2-methoxy-ethyl)ammonium bis solutes and water in the ionic liquid (trifluoromethylsulfonyl)imide. J. Chem. Thermodynamics, 2015, 91: 194–203
[CH3OC2N1,2,2][NTf2]	358.15	1.28	1.59	2	2.57	5.59	N.A	2.57	7.64	10.9	15.2	0.49	1.329	1.53	1.799	1.56	2.475	N.A	1.24	2.185	3.044	4.173	0.4592	0.0382812	-0.0377358	-0.1005	-0.392996	-0.557245	N.A	-0.51751	-0.714005	-0.720734	-0.725461	-0.0628571	Marek Królikowski, Marta Królikowska, Cezary Wiśniewski. Separation of aliphatic from aromatic hydrocarbons and sulphur compounds from fuel based on measurements of activity coefficients at infinite dilution for organic N,N-diethyl-N-methyl-N-(2-methoxy-ethyl)ammonium bis solutes and water in the ionic liquid (trifluoromethylsulfonyl)imide. J. Chem. Thermodynamics, 2015, 91: 194–203
[CH2OHN1,1,2][NTf2]	318.15	1.15	1.68	2.49	2.68	7.32	N.A	2.85	29.7	47	77.4	0.415	1.174	1.479	1.905	2.14	4.198	N.A	1.727	5.221	8.045	12.2	0.4196	0.0208696	-0.119643	-0.23494	-0.201493	-0.426503	N.A	-0.394035	-0.824209	-0.82883	-0.842377	0.0110843	Urszula Domańska, Paulina Papis, Jerzy Szydłowski. Thermodynamics and activity coefficients at infinite dilution for organic solutes, water and diols in the ionic liquid choline bis(trifluoromethylsulfonyl)imide. J. Chem. Thermodynamics, 2014, 77: 63–70
[CH2OHN1,1,2][NTf2]	328.15	1.14	1.65	2.42	2.92	7.73	N.A	3.03	28.2	44.5	72.3	0.437	1.155	1.452	1.867	2.177	4.205	N.A	1.743	5.074	7.784	11.75	0.4241	0.0131579	-0.12	-0.228512	-0.254452	-0.456016	N.A	-0.424752	-0.820071	-0.825079	-0.837483	-0.0295195	Urszula Domańska, Paulina Papis, Jerzy Szydłowski. Thermodynamics and activity coefficients at infinite dilution for organic solutes, water and diols in the ionic liquid choline bis(trifluoromethylsulfonyl)imide. J. Chem. Thermodynamics, 2014, 77: 63–70
[CH2OHN1,1,2][NTf2]	338.15	1.13	1.62	2.36	3.14	8.17	N.A	3.21	27.1	42.5	67.8	0.458	1.137	1.427	1.831	2.21	4.208	N.A	1.758	4.937	7.541	11.34	0.4283	0.00619469	-0.119136	-0.224153	-0.296178	-0.484945	N.A	-0.452336	-0.817823	-0.822565	-0.832743	-0.0648472	Urszula Domańska, Paulina Papis, Jerzy Szydłowski. Thermodynamics and activity coefficients at infinite dilution for organic solutes, water and diols in the ionic liquid choline bis(trifluoromethylsulfonyl)imide. J. Chem. Thermodynamics, 2014, 77: 63–70
[CH2OHN1,1,2][NTf2]	348.15	1.12	1.6	2.3	3.38	8.56	N.A	3.38	26	40.7	64	0.479	1.12	1.404	1.798	2.24	4.207	N.A	1.771	4.809	7.314	10.95	0.4322	0	-0.1225	-0.218261	-0.337278	-0.508528	N.A	-0.476036	-0.815038	-0.820295	-0.828906	-0.0977035	Urszula Domańska, Paulina Papis, Jerzy Szydłowski. Thermodynamics and activity coefficients at infinite dilution for organic solutes, water and diols in the ionic liquid choline bis(trifluoromethylsulfonyl)imide. J. Chem. Thermodynamics, 2014, 77: 63–70
[CH2OHN1,1,2][NTf2]	358.15	1.11	1.58	2.24	3.56	9	N.A	3.56	24.9	38.9	60.6	0.499	1.104	1.382	1.767	2.268	4.204	N.A	1.783	4.688	7.102	10.59	0.4358	-0.00540541	-0.125316	-0.211161	-0.362921	-0.532889	N.A	-0.499157	-0.811727	-0.817429	-0.825248	-0.126653	Urszula Domańska, Paulina Papis, Jerzy Szydłowski. Thermodynamics and activity coefficients at infinite dilution for organic solutes, water and diols in the ionic liquid choline bis(trifluoromethylsulfonyl)imide. J. Chem. Thermodynamics, 2014, 77: 63–70
[CH2OHN1,1,2][NTf2]	368.15	1.1	1.57	2.19	3.73	9.41	N.A	3.73	24.1	37.5	57.4	0.52	1.089	1.362	1.738	2.294	4.197	N.A	1.793	4.575	6.902	10.25	0.439	-0.01	-0.132484	-0.206393	-0.384987	-0.553985	N.A	-0.519303	-0.810166	-0.815947	-0.821429	-0.155769	Urszula Domańska, Paulina Papis, Jerzy Szydłowski. Thermodynamics and activity coefficients at infinite dilution for organic solutes, water and diols in the ionic liquid choline bis(trifluoromethylsulfonyl)imide. J. Chem. Thermodynamics, 2014, 77: 63–70

## Sheet: Table S3
Table S3. Detailed ternary LLE database used for UNIFAC-IL validation.
(a) {IL + aromatic + alkane/cycloalkane/aromatic}
system NO.	Composition of the ternary systems			T/K	Experimental LLE							Calculated LLE						RMSD	References
					Upper phase			Lower phase				Upper phase			Lower phase
	Component 1	Component 2	Component 3 (IL)		x1	x2	x3	x1	x2	x3		x1	x2	x3	x1	x2	x3
1	toluene	n-heptane	[CH2=CHC1MIm[NTf2]	313.2	0	0.0178	0.9822	0	1	0		0	0.0289054	0.971082	1.7612e-12	1	1.7612e-12
1	toluene	n-heptane	[CH2=CHC1MIm[NTf2]	313.2	0.0214	0.0186	0.96	0.0297	0.9703	0		0.00890493	0.0220338	0.969071	0.026536	0.973464	2.4935e-09
1	toluene	n-heptane	[CH2=CHC1MIm[NTf2]	313.2	0.0454	0.0162	0.9384	0.0657	0.9343	0		0.00987146	0.0162	0.973929	0.0589677	0.941032	2.4094e-08
1	toluene	n-heptane	[CH2=CHC1MIm[NTf2]	313.2	0.0947	0.0174	0.8879	0.1364	0.8636	0		0.0241881	0.046052	0.92976	0.12903	0.87097	1.0925e-07
1	toluene	n-heptane	[CH2=CHC1MIm[NTf2]	313.2	0.1428	0.0164	0.8408	0.2174	0.7826	0		0.0927159	0.0164	0.890884	0.210163	0.789836	4.7817e-07
1	toluene	n-heptane	[CH2=CHC1MIm[NTf2]	313.2	0.2205	0.0154	0.7641	0.3421	0.6579	0		0.108547	0.0662887	0.825165	0.341683	0.658315	2.1404e-06
1	toluene	n-heptane	[CH2=CHC1MIm[NTf2]	313.2	0.2847	0.0147	0.7006	0.4674	0.5326	0		0.214745	0.0147	0.770555	0.472411	0.52758	9.4051e-06
1	toluene	n-heptane	[CH2=CHC1MIm[NTf2]	313.2	0.3252	0.0151	0.6597	0.5264	0.4736	0		0.150591	0.120544	0.728865	0.531908	0.468051	4.1124e-05
1	toluene	n-heptane	[CH2=CHC1MIm[NTf2]	313.2	0.3921	0.0129	0.595	0.6324	0.3676	0		0.328977	0.0129	0.658123	0.638636	0.361125	0.00023945
1	toluene	n-heptane	[CH2=CHC1MIm[NTf2]	313.2	0.445	0.0124	0.5426	0.7442	0.2558	0		0.526148	0.0124	0.461452	0.741341	0.2558	0.002859
1	toluene	n-heptane	[CH2=CHC1MIm[NTf2]	313.2	0.5019	0.0107	0.4874	0.834	0.166	0		0.504143	0.0107	0.485157	0.834487	0.165513	3.7036e-10
1	toluene	n-heptane	[CH2=CHC1MIm[NTf2]	313.2	0.5891	0	0.4109	1	0	0		0.58963	0	0.41037	1	0	2.013e-09	0.0395	Song, Z.; Zhou, T.; Qi, Z.; Sundmacher, K. Extending the UNIFAC model for ionic liquid–solute systems by combining experimental and computational databases. AlChE J. 2019, DOI: 10.1002/aic.16821.
2	benzene	n-hexane	[CH2=CHC1Mor][NTf2]	298.2	0	0.058	0.942	0	1	0		0	0.0492074	0.950793	9.4953e-15	1	9.4953e-15
2	benzene	n-hexane	[CH2=CHC1Mor][NTf2]	298.2	0.067	0.016	0.917	0.048	0.952	0		0.0521158	0.0302585	0.917626	0.0948389	0.905161	3.9069e-14
2	benzene	n-hexane	[CH2=CHC1Mor][NTf2]	298.2	0.185	0.018	0.797	0.13	0.87	0		0.177456	0.0314878	0.791056	0.164191	0.835809	2.5317e-13
2	benzene	n-hexane	[CH2=CHC1Mor][NTf2]	298.2	0.253	0.02	0.727	0.21	0.79	0		0.247487	0.0325475	0.719965	0.237817	0.762183	9.3377e-13
2	benzene	n-hexane	[CH2=CHC1Mor][NTf2]	298.2	0.317	0.019	0.664	0.303	0.697	0		0.316876	0.0294319	0.653692	0.322507	0.677493	2.4821e-12
2	benzene	n-hexane	[CH2=CHC1Mor][NTf2]	298.2	0.363	0.017	0.62	0.39	0.61	0		0.371747	0.02456	0.603693	0.398743	0.601257	9.371e-12
2	benzene	n-hexane	[CH2=CHC1Mor][NTf2]	298.2	0.435	0.012	0.553	0.515	0.485	0		0.442702	0.0165543	0.540743	0.524867	0.475133	3.4152e-11
2	benzene	n-hexane	[CH2=CHC1Mor][NTf2]	298.2	0.485	0.013	0.502	0.619	0.381	0		0.501152	0.0164243	0.482424	0.616452	0.383548	1.0101e-10
2	benzene	n-hexane	[CH2=CHC1Mor][NTf2]	298.2	0.544	0.01	0.446	0.723	0.277	0		0.542743	0.0112568	0.446	0.724376	0.275624	6.8049e-10
2	benzene	n-hexane	[CH2=CHC1Mor][NTf2]	298.2	0.622	0.007	0.371	0.863	0.137	0		0.627092	0.0080756	0.364832	0.861391	0.138609	2.0878e-09	0.0142	Song, Z.; Zhou, T.; Qi, Z.; Sundmacher, K. Extending the UNIFAC model for ionic liquid–solute systems by combining experimental and computational databases. AlChE J. 2019, DOI: 10.1002/aic.16821.
3	toluene	n-heptane	[CH2=CHC1Mor][NTf2]	298.2	0	0.048	0.952	0	1	0		0.0410384	0.038482	0.92048	0	1	5.2129e-09
3	toluene	n-heptane	[CH2=CHC1Mor][NTf2]	298.2	0.049	0.021	0.93	0.073	0.927	0		0.100238	0.0159873	0.883775	0.00312554	0.996874	1.9746e-08
3	toluene	n-heptane	[CH2=CHC1Mor][NTf2]	298.2	0.104	0.028	0.868	0.155	0.845	0		0.155662	0.0307244	0.813613	0.0955608	0.904439	8.1205e-08
3	toluene	n-heptane	[CH2=CHC1Mor][NTf2]	298.2	0.172	0.021	0.807	0.278	0.722	0		0.235965	0.0208096	0.743226	0.205583	0.794416	3.715e-07
3	toluene	n-heptane	[CH2=CHC1Mor][NTf2]	298.2	0.218	0.017	0.765	0.375	0.625	0		0.27628	0.0151591	0.708561	0.311879	0.68812	9.4138e-07
3	toluene	n-heptane	[CH2=CHC1Mor][NTf2]	298.2	0.261	0.018	0.721	0.399	0.601	0		0.333681	0.0153411	0.650977	0.311748	0.688248	4.2163e-06
3	toluene	n-heptane	[CH2=CHC1Mor][NTf2]	298.2	0.311	0.018	0.671	0.523	0.477	0		0.38812	0.0152147	0.596665	0.439288	0.560695	1.728e-05
3	toluene	n-heptane	[CH2=CHC1Mor][NTf2]	298.2	0.359	0.014	0.627	0.636	0.364	0		0.46132	0.0106067	0.528073	0.521112	0.478801	8.7182e-05
3	toluene	n-heptane	[CH2=CHC1Mor][NTf2]	298.2	0.415	0.012	0.573	0.749	0.251	0		0.422377	0.00462275	0.573	0.738976	0.261024	5.5938e-10
3	toluene	n-heptane	[CH2=CHC1Mor][NTf2]	298.2	0.48	0.008	0.512	0.872	0.128	0		0.483752	0.00814327	0.508105	0.871043	0.128957	1.5112e-09
3	toluene	n-heptane	[CH2=CHC1Mor][NTf2]	298.2	0.579	0	0.421	1	0	0		0.587757	0	0.412243	1	0	4.5299e-09	0.0494	Song, Z.; Zhou, T.; Qi, Z.; Sundmacher, K. Extending the UNIFAC model for ionic liquid–solute systems by combining experimental and computational databases. AlChE J. 2019, DOI: 10.1002/aic.16821.
4	toluene	n-heptane	[CH2=CHC1Mor][N(CN)2]	313.2	0	0.0028	0.9972	0	1	0		0	0.00234646	0.997654	2.8343e-15	1	2.8343e-15
4	toluene	n-heptane	[CH2=CHC1Mor][N(CN)2]	313.2	0.0147	0.0029	0.9824	0.0564	0.9436	0		0.0334313	0.00425063	0.962318	0.0762729	0.923727	1.4439e-14
4	toluene	n-heptane	[CH2=CHC1Mor][N(CN)2]	313.2	0.0203	0.0029	0.9768	0.0799	0.9201	0		0.0500904	0.00431752	0.945592	0.108921	0.891079	4.7831e-14
4	toluene	n-heptane	[CH2=CHC1Mor][N(CN)2]	313.2	0.044	0.0029	0.9531	0.1754	0.8246	0		0.00157382	0.00440558	0.994021	0.209396	0.790604	1.5319e-13
4	toluene	n-heptane	[CH2=CHC1Mor][N(CN)2]	313.2	0.0648	0.0027	0.9325	0.263	0.737	0		0.0167435	0.00418491	0.979072	0.297925	0.702075	4.2387e-13
4	toluene	n-heptane	[CH2=CHC1Mor][N(CN)2]	313.2	0.1058	0.0024	0.8918	0.4245	0.5755	0		0.0381045	0.00381712	0.958078	0.463185	0.536815	2.1471e-12
4	toluene	n-heptane	[CH2=CHC1Mor][N(CN)2]	313.2	0.1309	0.0024	0.8667	0.5067	0.4933	0		0.0374902	0.00571056	0.956799	0.551637	0.448363	6.8544e-12
4	toluene	n-heptane	[CH2=CHC1Mor][N(CN)2]	313.2	0.1452	0.0022	0.8526	0.591	0.409	0		0.0586607	0.010131	0.931208	0.626693	0.373307	1.7386e-11
4	toluene	n-heptane	[CH2=CHC1Mor][N(CN)2]	313.2	0.1667	0.0018	0.8315	0.6813	0.3187	0		0.0272796	0.00740286	0.965318	0.72349	0.27651	5.081e-11
4	toluene	n-heptane	[CH2=CHC1Mor][N(CN)2]	313.2	0.1909	0.0015	0.8076	0.779	0.221	0		0.0386385	0.00436785	0.956994	0.811654	0.188346	1.436e-10
4	toluene	n-heptane	[CH2=CHC1Mor][N(CN)2]	313.2	0.2158	0.0011	0.7831	0.8546	0.1454	0		0.208206	0.00171424	0.79008	0.855955	0.144045	1.6111e-15
4	toluene	n-heptane	[CH2=CHC1Mor][N(CN)2]	313.2	0.2701	0	0.7299	1	0	0		0.26094	0	0.73906	1	0	7.1086e-15	0.0465	Song, Z.; Zhou, T.; Qi, Z.; Sundmacher, K. Extending the UNIFAC model for ionic liquid–solute systems by combining experimental and computational databases. AlChE J. 2019, DOI: 10.1002/aic.16821.
5	benzene	cyclohexane	[CH2=CHC1Mor][NTf2]	298.2	0	0.03	0.97	0	1	0		0	0.0268618	0.973138	0.00401487	0.995985	4.1681e-14
5	benzene	cyclohexane	[CH2=CHC1Mor][NTf2]	298.2	0.097	0.043	0.86	0.082	0.918	0		0.0633396	0.0745491	0.862111	0.0851908	0.914809	1.6153e-13
5	benzene	cyclohexane	[CH2=CHC1Mor][NTf2]	298.2	0.168	0.037	0.795	0.165	0.835	0		0.102745	0.0681614	0.829094	0.199023	0.800977	6.781e-13
5	benzene	cyclohexane	[CH2=CHC1Mor][NTf2]	298.2	0.266	0.041	0.693	0.259	0.741	0		0.250876	0.0399422	0.709182	0.275364	0.724636	2.9845e-12
5	benzene	cyclohexane	[CH2=CHC1Mor][NTf2]	298.2	0.311	0.037	0.652	0.338	0.662	0		0.246995	0.0365615	0.716443	0.392255	0.607745	1.0389e-11
5	benzene	cyclohexane	[CH2=CHC1Mor][NTf2]	298.2	0.373	0.033	0.594	0.446	0.554	0		0.269821	0.061776	0.668403	0.503039	0.496961	3.2731e-11
5	benzene	cyclohexane	[CH2=CHC1Mor][NTf2]	298.2	0.394	0.032	0.574	0.474	0.526	0		0.339092	0.01984	0.641068	0.518018	0.481982	1.4842e-10
5	benzene	cyclohexane	[CH2=CHC1Mor][NTf2]	298.2	0.491	0.026	0.483	0.646	0.354	0		0.480783	0.0370415	0.482176	0.646	0.354	2.356e-49
5	benzene	cyclohexane	[CH2=CHC1Mor][NTf2]	298.2	0.574	0.023	0.403	0.764	0.236	0		0.565243	0.0324081	0.402349	0.764022	0.235978	4.3949e-25
5	benzene	cyclohexane	[CH2=CHC1Mor][NTf2]	298.2	0.641	0.015	0.344	0.877	0.123	0		0.635223	0.0213788	0.343398	0.877008	0.122992	9.1727e-24	0.032	Song, Z.; Zhou, T.; Qi, Z.; Sundmacher, K. Extending the UNIFAC model for ionic liquid–solute systems by combining experimental and computational databases. AlChE J. 2019, DOI: 10.1002/aic.16821.
6	styrene	ethylbenzene	[C3CNPy][N(CN)2]	298.15	0.152	0	0.848	1	0	0		0.31475	0	0.68525	0.99152	0	0.0084772
6	styrene	ethylbenzene	[C3CNPy][N(CN)2]	298.15	0.149	0.002	0.849	0.967	0.033	0		0.30059	0.0058714	0.69354	0.95688	0.03552	0.0075972
6	styrene	ethylbenzene	[C3CNPy][N(CN)2]	298.15	0.143	0.005	0.852	0.917	0.083	0		0.2801	0.014331	0.70556	0.90504	0.088527	0.0064279
6	styrene	ethylbenzene	[C3CNPy][N(CN)2]	298.15	0.126	0.013	0.861	0.814	0.186	0		0.24006	0.030749	0.72919	0.79796	0.19756	0.0044772
6	styrene	ethylbenzene	[C3CNPy][N(CN)2]	298.15	0.097	0.023	0.88	0.644	0.356	0		0.18096	0.054723	0.76432	0.62628	0.37138	0.0023331
6	styrene	ethylbenzene	[C3CNPy][N(CN)2]	298.15	0.083	0.029	0.888	0.545	0.455	0		0.14957	0.067344	0.78308	0.52857	0.46992	0.0015131
6	styrene	ethylbenzene	[C3CNPy][N(CN)2]	298.15	0.058	0.037	0.905	0.395	0.605	0		0.10456	0.085323	0.81012	0.38056	0.61876	0.0006778
6	styrene	ethylbenzene	[C3CNPy][N(CN)2]	298.15	0.043	0.042	0.915	0.31	0.69	0		0.080155	0.095017	0.82483	0.2964	0.70323	0.00037611
6	styrene	ethylbenzene	[C3CNPy][N(CN)2]	298.15	0.028	0.047	0.925	0.192	0.808	0		0.048812	0.10742	0.84377	0.1842	0.81567	0.00012684
6	styrene	ethylbenzene	[C3CNPy][N(CN)2]	298.15	0.011	0.053	0.936	0.096	0.904	0		0.023346	0.11746	0.8592	0.089572	0.9104	2.5692e-05
6	styrene	ethylbenzene	[C3CNPy][N(CN)2]	298.15	0.006	0.055	0.939	0.037	0.963	0		0.0092749	0.12299	0.86774	0.035913	0.96408	3.5485e-06
6	styrene	ethylbenzene	[C3CNPy][N(CN)2]	298.15	0	0.056	0.944	0	1	0		0	0.12663	0.87337	0	1	1.3138e-11	0.0622	Song, Z.; Zhou, T.; Qi, Z.; Sundmacher, K. Extending the UNIFAC model for ionic liquid–solute systems by combining experimental and computational databases. AlChE J. 2019, DOI: 10.1002/aic.16821.
7	styrene	ethylbenzene	[OHC3MMor][N(CN)2]	298.15	0.143	0	0.857	1	0	0		0.230561	0	0.769439	0.996518	3.20924e-17	0.0034817
7	styrene	ethylbenzene	[OHC3MMor][N(CN)2]	298.15	0.141	0.002	0.857	0.973	0.027	0		0.23592	0.0141431	0.749937	0.971437	0.0210283	0.0075347
7	styrene	ethylbenzene	[OHC3MMor][N(CN)2]	298.15	0.133	0.007	0.86	0.885	0.115	0		0.164483	0.0542374	0.78128	0.904752	0.0939341	0.001314
7	styrene	ethylbenzene	[OHC3MMor][N(CN)2]	298.15	0.125	0.011	0.864	0.824	0.176	0		0.180846	0.0863192	0.732835	0.853995	0.143239	0.0027663
7	styrene	ethylbenzene	[OHC3MMor][N(CN)2]	298.15	0.114	0.017	0.869	0.745	0.255	0		0.0422084	0.16989	0.787902	0.781385	0.212195	0.0064198
7	styrene	ethylbenzene	[OHC3MMor][N(CN)2]	298.15	0.084	0.031	0.885	0.582	0.418	0		0.110521	0.129635	0.759843	0.563822	0.436177	4.3902e-07
7	styrene	ethylbenzene	[OHC3MMor][N(CN)2]	298.15	0.061	0.038	0.901	0.447	0.553	0		0.119906	0.0833593	0.796735	0.490336	0.509661	3.1978e-06
7	styrene	ethylbenzene	[OHC3MMor][N(CN)2]	298.15	0.042	0.044	0.914	0.328	0.672	0		0.0773	0.1067	0.816	0.443402	0.556574	2.3803e-05
7	styrene	ethylbenzene	[OHC3MMor][N(CN)2]	298.15	0.031	0.048	0.921	0.229	0.771	0		0.0112781	0.162184	0.826538	0.385417	0.614493	9.0509e-05
7	styrene	ethylbenzene	[OHC3MMor][N(CN)2]	298.15	0.018	0.052	0.93	0.127	0.873	0		0.00987624	0.178932	0.811192	0.3128	0.686946	0.00025315
7	styrene	ethylbenzene	[OHC3MMor][N(CN)2]	298.15	0.011	0.054	0.935	0.066	0.934	0		0.0332596	0.106237	0.860504	0.107857	0.891556	0.00058709
7	styrene	ethylbenzene	[OHC3MMor][N(CN)2]	298.15	0.005	0.056	0.939	0.023	0.977	0		0.00724219	0.080136	0.912622	0.0853778	0.91338	0.0012426
7	styrene	ethylbenzene	[OHC3MMor][N(CN)2]	298.15	0	0.057	0.943	0	1	0		0.0110601	0.0258336	0.963106	0	0.997362	0.0026384	0.0686	Song, Z.; Zhou, T.; Qi, Z.; Sundmacher, K. Extending the UNIFAC model for ionic liquid–solute systems by combining experimental and computational databases. AlChE J. 2019, DOI: 10.1002/aic.16821.
8	styrene	ethylbenzene	[OHC3MIm][N(CN)2]	298.15	0.295	0	0.705	1	0	0		0.552734	0	0.447266	0.994076	0	0.0059242
8	styrene	ethylbenzene	[OHC3MIm][N(CN)2]	298.15	0.275	0.008	0.717	0.94	0.06	0		0.124098	0.000296551	0.875605	0.938691	0.0613088	4.0627e-12
8	styrene	ethylbenzene	[OHC3MIm][N(CN)2]	298.15	0.249	0.016	0.735	0.878	0.122	0		0.153196	0.00092002	0.845884	0.860134	0.139866	1.195e-13
8	styrene	ethylbenzene	[OHC3MIm][N(CN)2]	298.15	0.228	0.024	0.748	0.81	0.19	0		0.159663	0.00151338	0.838823	0.781344	0.218656	5.8849e-14
8	styrene	ethylbenzene	[OHC3MIm][N(CN)2]	298.15	0.208	0.03	0.762	0.745	0.255	0		0.0425583	0.00128133	0.95616	0.72506	0.27494	9.9586e-13
8	styrene	ethylbenzene	[OHC3MIm][N(CN)2]	298.15	0.177	0.039	0.784	0.662	0.338	0		0.113654	0.00103196	0.885314	0.664544	0.335456	9.5801e-12
8	styrene	ethylbenzene	[OHC3MIm][N(CN)2]	298.15	0.154	0.048	0.798	0.576	0.424	0		0.0873699	0.000867295	0.911763	0.559488	0.440512	6.7006e-12
8	styrene	ethylbenzene	[OHC3MIm][N(CN)2]	298.15	0.105	0.064	0.831	0.416	0.584	0		0.0983601	0.000971705	0.900668	0.435875	0.564125	3.2247e-12
8	styrene	ethylbenzene	[OHC3MIm][N(CN)2]	298.15	0.081	0.071	0.848	0.318	0.682	0		0.109649	0.00426847	0.886082	0.18022	0.81978	2.3312e-14
8	styrene	ethylbenzene	[OHC3MIm][N(CN)2]	298.15	0.054	0.082	0.864	0.223	0.777	0		0.0645346	0.00454242	0.930923	0.0721126	0.927887	9.309e-14
8	styrene	ethylbenzene	[OHC3MIm][N(CN)2]	298.15	0.03	0.093	0.877	0.132	0.868	0		0.0173581	0.0047526	0.977889	0.050102	0.949898	2.1903e-13
8	styrene	ethylbenzene	[OHC3MIm][N(CN)2]	298.15	0.019	0.094	0.887	0.075	0.925	0		0.0363453	0.00444112	0.959214	0.0286436	0.971356	4.0692e-13
8	styrene	ethylbenzene	[OHC3MIm][N(CN)2]	298.15	0.13	0.057	0.813	0.507	0.493	0		0.022673	0.00249516	0.974832	0.463023	0.536977	6.5986e-13
8	styrene	ethylbenzene	[OHC3MIm][N(CN)2]	298.15	0	0.102	0.898	0	1	0		0.0761657	0.00414917	0.919685	0	1	0	0.0803	Song, Z.; Zhou, T.; Qi, Z.; Sundmacher, K. Extending the UNIFAC model for ionic liquid–solute systems by combining experimental and computational databases. AlChE J. 2019, DOI: 10.1002/aic.16821.
9	styrene	ethylbenzene	[OHC3Py][N(CN)2]	298.15	0.252	0	0.748	1	0	0		0.039314	0	0.960686	0.9591	0	0.0409
9	styrene	ethylbenzene	[OHC3Py][N(CN)2]	298.15	0.232	0.007	0.761	0.938	0.062	0		0.137426	0.000247714	0.862327	0.897668	0.0725319	0.0298
9	styrene	ethylbenzene	[OHC3Py][N(CN)2]	298.15	0.217	0.012	0.771	0.883	0.117	0		0.122668	0.000397559	0.876934	0.840655	0.135945	0.0234
9	styrene	ethylbenzene	[OHC3Py][N(CN)2]	298.15	0.196	0.02	0.784	0.815	0.185	0		0.176693	0.0043727	0.818934	0.777784	0.222216	0
9	styrene	ethylbenzene	[OHC3Py][N(CN)2]	298.15	0.177	0.026	0.797	0.75	0.25	0		0.138575	0.0052416	0.856184	0.701668	0.298332	7.7784e-13
9	styrene	ethylbenzene	[OHC3Py][N(CN)2]	298.15	0.153	0.035	0.812	0.661	0.339	0		0.0975056	0.00646439	0.89603	0.599691	0.400309	1.7314e-12
9	styrene	ethylbenzene	[OHC3Py][N(CN)2]	298.15	0.129	0.044	0.827	0.574	0.426	0		0.0553994	0.00753417	0.937066	0.501124	0.498876	3.072e-12
9	styrene	ethylbenzene	[OHC3Py][N(CN)2]	298.15	0.117	0.05	0.833	0.522	0.478	0		0.025333	0.00806593	0.966601	0.445543	0.554457	4.7715e-12
9	styrene	ethylbenzene	[OHC3Py][N(CN)2]	298.15	0.094	0.057	0.849	0.434	0.566	0		0.126401	0.00864475	0.864954	0.34876	0.65124	6.7983e-12
9	styrene	ethylbenzene	[OHC3Py][N(CN)2]	298.15	0.073	0.063	0.864	0.331	0.669	0		0.0167229	0.00900023	0.974277	0.234638	0.765362	9.1239e-12
9	styrene	ethylbenzene	[OHC3Py][N(CN)2]	298.15	0.052	0.068	0.88	0.256	0.744	0		0.036645	0.00913593	0.954219	0.155397	0.844603	1.1658e-11
9	styrene	ethylbenzene	[OHC3Py][N(CN)2]	298.15	0.033	0.074	0.893	0.155	0.845	0		0.0318631	0.00936476	0.958772	0.0452768	0.954723	1.441e-11
9	styrene	ethylbenzene	[OHC3Py][N(CN)2]	298.15	0.017	0.079	0.904	0.08	0.92	0		0.016118	0.00955933	0.974323	0.068724	0.931276	1.7285e-11
9	styrene	ethylbenzene	[OHC3Py][N(CN)2]	298.15	0	0.085	0.915	0.001	0.999	0		0.0529559	0.0097277	0.937316	0.000334	0.999666	2.0264e-11	0.067	Song, Z.; Zhou, T.; Qi, Z.; Sundmacher, K. Extending the UNIFAC model for ionic liquid–solute systems by combining experimental and computational databases. AlChE J. 2019, DOI: 10.1002/aic.16821.
10	styrene	ethylbenzene	[C3CNMPyr][N(CN)2]	298.15	0.32	0	0.68	1	0	0		0.16897	0	0.83103	0.9976	0	0.0023974
10	styrene	ethylbenzene	[C3CNMPyr][N(CN)2]	298.15	0.309	0.005	0.686	0.966	0.034	0		0.16313	0.0030684	0.8338	0.96686	0.030909	0.002233
10	styrene	ethylbenzene	[C3CNMPyr][N(CN)2]	298.15	0.295	0.013	0.692	0.911	0.089	0		0.15374	0.0079986	0.83826	0.91697	0.081052	0.0019801
10	styrene	ethylbenzene	[C3CNMPyr][N(CN)2]	298.15	0.262	0.026	0.712	0.823	0.177	0		0.13855	0.015971	0.84547	0.83497	0.16343	0.0016015
10	styrene	ethylbenzene	[C3CNMPyr][N(CN)2]	298.15	0.225	0.044	0.731	0.736	0.264	0		0.12274	0.02427	0.85299	0.74782	0.25093	0.0012483
10	styrene	ethylbenzene	[C3CNMPyr][N(CN)2]	298.15	0.185	0.063	0.752	0.649	0.351	0		0.10666	0.032714	0.86063	0.65718	0.34188	0.00093302
10	styrene	ethylbenzene	[C3CNMPyr][N(CN)2]	298.15	0.147	0.073	0.78	0.54	0.46	0		0.088228	0.042383	0.86939	0.55084	0.44853	0.00062799
10	styrene	ethylbenzene	[C3CNMPyr][N(CN)2]	298.15	0.124	0.08	0.796	0.452	0.548	0		0.073868	0.049917	0.87621	0.46602	0.53355	0.00043245
10	styrene	ethylbenzene	[C3CNMPyr][N(CN)2]	298.15	0.1	0.087	0.813	0.348	0.652	0		0.057279	0.058619	0.8841	0.36581	0.63393	0.00025281	0.0667	Song, Z.; Zhou, T.; Qi, Z.; Sundmacher, K. Extending the UNIFAC model for ionic liquid–solute systems by combining experimental and computational databases. AlChE J. 2019, DOI: 10.1002/aic.16821.
(b) {IL + S-compound + alkane/cycloalkane/aromatic}
LLE system NO.	Composition of the ternary systems			T/K	Experimental LLE							Calculated LLE						RMSD	References
					Upper phase			Lower phase				Upper phase			Lower phase
	Component 1	Component 2	Component 3 (IL)		x1	x2	x3	x1	x2	x3		x1	x2	x3	x1	x2	x3
11	thiophene	n-heptane	[COC2MMor][NTf2]	298.15	0	0.016	0.984	0	1	0		0.00457222	0.0101387	0.985289	0	1	0
11	thiophene	n-heptane	[COC2MMor][NTf2]	298.15	0.096	0.016	0.888	0.054	0.946	0		0.139632	0.0096381	0.85073	0.0137105	0.986289	0
11	thiophene	n-heptane	[COC2MMor][NTf2]	298.15	0.189	0.016	0.795	0.118	0.882	0		0.188822	0.0088096	0.802369	0.0912973	0.908703	0
11	thiophene	n-heptane	[COC2MMor][NTf2]	298.15	0.307	0.017	0.676	0.209	0.791	0		0.293654	0.00856446	0.697781	0.200404	0.799596	0
11	thiophene	n-heptane	[COC2MMor][NTf2]	298.15	0.395	0.017	0.588	0.295	0.705	0		0.385319	0.0266811	0.588	0.18925	0.81075	0
11	thiophene	n-heptane	[COC2MMor][NTf2]	298.15	0.473	0.018	0.509	0.409	0.591	0		0.478002	0.0265927	0.495406	0.266167	0.733833	0
11	thiophene	n-heptane	[COC2MMor][NTf2]	298.15	0.503	0.018	0.479	0.457	0.543	0		0.522911	0.0256192	0.45147	0.352744	0.647256	0
11	thiophene	n-heptane	[COC2MMor][NTf2]	298.15	0.571	0.02	0.409	0.571	0.429	0		0.601936	0.0262003	0.371864	0.516904	0.483096	0
11	thiophene	n-heptane	[COC2MMor][NTf2]	298.15	0.578	0.021	0.401	0.587	0.413	0		0.629768	0.0268012	0.343431	0.51032	0.48968	0
11	thiophene	n-heptane	[COC2MMor][NTf2]	298.15	0.624	0.019	0.357	0.697	0.303	0		0.678937	0.0223619	0.298701	0.623594	0.376406	0
11	thiophene	n-heptane	[COC2MMor][NTf2]	298.15	0.673	0.018	0.309	0.793	0.207	0		0.739759	0.0203531	0.239888	0.74068	0.25932	0	0.0482	Song, Z.; Zhou, T.; Qi, Z.; Sundmacher, K. Extending the UNIFAC model for ionic liquid–solute systems by combining experimental and computational databases. AlChE J. 2019, DOI: 10.1002/aic.16821.
12	thiophene	n-heptane	[COC2mPip][NTf2]	298.15	0	0.039	0.961	0	1	0		0.219773	0.0399182	0.740308	0	1	0
12	thiophene	n-heptane	[COC2mPip][NTf2]	298.15	0.084	0.04	0.876	0.032	0.968	0		0.243583	0.0333441	0.723073	0.0220791	0.977921	0
12	thiophene	n-heptane	[COC2mPip][NTf2]	298.15	0.22	0.041	0.739	0.097	0.903	0		0.368475	0.0305931	0.600932	0.0483008	0.951699	0
12	thiophene	n-heptane	[COC2mPip][NTf2]	298.15	0.387	0.041	0.572	0.199	0.801	0		0.3593	0.0686996	0.572	0.10288	0.89712	0
12	thiophene	n-heptane	[COC2mPip][NTf2]	298.15	0.46	0.039	0.501	0.273	0.727	0		0.448164	0.0576916	0.494145	0.132237	0.867763	0
12	thiophene	n-heptane	[COC2mPip][NTf2]	298.15	0.519	0.04	0.441	0.342	0.658	0		0.521261	0.0524633	0.426276	0.217506	0.782494	0
12	thiophene	n-heptane	[COC2mPip][NTf2]	298.15	0.621	0.039	0.34	0.493	0.507	0		0.628681	0.0497315	0.321588	0.395656	0.604344	0
12	thiophene	n-heptane	[COC2mPip][NTf2]	298.15	0.629	0.037	0.334	0.521	0.479	0		0.643656	0.0458276	0.310516	0.438945	0.561055	0
12	thiophene	n-heptane	[COC2mPip][NTf2]	298.15	0.684	0.039	0.277	0.628	0.372	0		0.702218	0.0469787	0.250803	0.56091	0.43909	0
12	thiophene	n-heptane	[COC2mPip][NTf2]	298.15	0.727	0.037	0.236	0.741	0.259	0		0.750946	0.0395416	0.209513	0.700527	0.299473	0
12	thiophene	n-heptane	[COC2mPip][NTf2]	298.15	0.774	0.031	0.195	0.855	0.145	0		0.804654	0.0285532	0.166792	0.83587	0.16413	0
12	thiophene	n-heptane	[COC2mPip][NTf2]	298.15	0.799	0.025	0.176	0.904	0.096	0		0.828517	0.0249479	0.146535	0.893375	0.106625	0	0.0684	Song, Z.; Zhou, T.; Qi, Z.; Sundmacher, K. Extending the UNIFAC model for ionic liquid–solute systems by combining experimental and computational databases. AlChE J. 2019, DOI: 10.1002/aic.16821.
13	thiophene	n-heptane	[COC2mPyr][NTf2]	298.15	0	0.049	0.951	0	1	0		0.0622489	0.0446955	0.893056	0	1	0
13	thiophene	n-heptane	[COC2mPyr][NTf2]	298.15	0.087	0.033	0.88	0.036	0.964	0		0.118389	0.029887	0.851724	0.0276538	0.972346	0
13	thiophene	n-heptane	[COC2mPyr][NTf2]	298.15	0.223	0.033	0.744	0.109	0.891	0		0.262971	0.0269737	0.710055	0.0399252	0.960075	0
13	thiophene	n-heptane	[COC2mPyr][NTf2]	298.15	0.368	0.036	0.596	0.212	0.788	0		0.392206	0.0289505	0.578843	0.170825	0.829175	0
13	thiophene	n-heptane	[COC2mPyr][NTf2]	298.15	0.41	0.035	0.555	0.249	0.751	0		0.413854	0.058646	0.5275	0.21145	0.78855	0
13	thiophene	n-heptane	[COC2mPyr][NTf2]	298.15	0.532	0.034	0.434	0.392	0.608	0		0.513166	0.0570112	0.429823	0.353512	0.646488	0
13	thiophene	n-heptane	[COC2mPyr][NTf2]	298.15	0.596	0.033	0.371	0.493	0.507	0		0.595788	0.0460983	0.358114	0.481081	0.518919	0
13	thiophene	n-heptane	[COC2mPyr][NTf2]	298.15	0.642	0.034	0.324	0.577	0.423	0		0.653157	0.0406179	0.306225	0.537609	0.462391	0
13	thiophene	n-heptane	[COC2mPyr][NTf2]	298.15	0.687	0.033	0.28	0.677	0.323	0		0.720401	0.03608	0.243519	0.539237	0.460763	0
13	thiophene	n-heptane	[COC2mPyr][NTf2]	298.15	0.716	0.031	0.253	0.756	0.244	0		0.756444	0.0296159	0.213941	0.749059	0.250941	0
13	thiophene	n-heptane	[COC2mPyr][NTf2]	298.15	0.717	0.031	0.252	0.762	0.238	0		0.719141	0.0261387	0.25472	0.817963	0.182037	0
13	thiophene	n-heptane	[COC2mPyr][NTf2]	298.15	0.764	0.026	0.21	0.861	0.139	0		0.758628	0.0255304	0.215841	0.895527	0.104473	0	0.0354	Song, Z.; Zhou, T.; Qi, Z.; Sundmacher, K. Extending the UNIFAC model for ionic liquid–solute systems by combining experimental and computational databases. AlChE J. 2019, DOI: 10.1002/aic.16821.
14	thiophene	n-heptane	[COC2MPip][FAP]	298.15	0	0.069	0.931	0	1	0		0.00224202	0.0758019	0.921956	0	1	0
14	thiophene	n-heptane	[COC2MPip][FAP]	298.15	0.099	0.068	0.833	0.025	0.975	0		0.0235237	0.0660104	0.910466	0.114943	0.885057	0
14	thiophene	n-heptane	[COC2MPip][FAP]	298.15	0.225	0.067	0.708	0.072	0.928	0		0.138757	0.0630228	0.79822	0.162177	0.837723	0.0001
14	thiophene	n-heptane	[COC2MPip][FAP]	298.15	0.376	0.063	0.561	0.148	0.852	0		0.27953	0.050705	0.669765	0.226056	0.773944	0
14	thiophene	n-heptane	[COC2MPip][FAP]	298.15	0.433	0.062	0.505	0.186	0.814	0		0.272653	0.0550431	0.672304	0.263518	0.736482	0
14	thiophene	n-heptane	[COC2MPip][FAP]	298.15	0.532	0.062	0.406	0.279	0.721	0		0.551525	0.0395466	0.408929	0.369914	0.629986	0.0001
14	thiophene	n-heptane	[COC2MPip][FAP]	298.15	0.637	0.059	0.304	0.462	0.538	0		0.649894	0.0394879	0.310618	0.612821	0.387079	0.0001
14	thiophene	n-heptane	[COC2MPip][FAP]	298.15	0.687	0.056	0.257	0.583	0.417	0		0.690144	0.0400408	0.269815	0.655845	0.344055	0.0001
14	thiophene	n-heptane	[COC2MPip][FAP]	298.15	0.723	0.053	0.224	0.679	0.321	0		0.721222	0.0372889	0.24149	0.719035	0.280865	0.0001
14	thiophene	n-heptane	[COC2MPip][FAP]	298.15	0.74	0.05	0.21	0.747	0.253	0		0.732895	0.0338676	0.233238	0.770201	0.229699	0.0001
14	thiophene	n-heptane	[COC2MPip][FAP]	298.15	0.766	0.044	0.19	0.803	0.197	0		0.734554	0.0368207	0.228626	0.833832	0.166068	0.0001
14	thiophene	n-heptane	[COC2MPip][FAP]	298.15	0.783	0.037	0.18	0.855	0.145	0		0.737309	0.0225528	0.240138	0.899389	0.100411	0.0002	0.065	Song, Z.; Zhou, T.; Qi, Z.; Sundmacher, K. Extending the UNIFAC model for ionic liquid–solute systems by combining experimental and computational databases. AlChE J. 2019, DOI: 10.1002/aic.16821.
15	thiophene	n-heptane	[COC2MPyr][FAP]	298.15	0	0.054	0.946	0	1	0		0.0247814	0.0218687	0.95335	0	1	0
15	thiophene	n-heptane	[COC2MPyr][FAP]	298.15	0.056	0.054	0.89	0.018	0.982	0		0.0527165	0.0193192	0.927964	0.0414694	0.958431	0.0001
15	thiophene	n-heptane	[COC2MPyr][FAP]	298.15	0.099	0.054	0.847	0.033	0.967	0		0.0821207	0.0184786	0.899401	0.0588584	0.941042	0.0001
15	thiophene	n-heptane	[COC2MPyr][FAP]	298.15	0.216	0.053	0.731	0.078	0.922	0		0.189349	0.0174517	0.7932	0.118251	0.881549	0.0002
15	thiophene	n-heptane	[COC2MPyr][FAP]	298.15	0.302	0.053	0.645	0.12	0.88	0		0.254725	0.0169361	0.728339	0.151364	0.848436	0.0002
15	thiophene	n-heptane	[COC2MPyr][FAP]	298.15	0.416	0.053	0.531	0.19	0.81	0		0.348644	0.0168184	0.634538	0.249846	0.750054	0.0001
15	thiophene	n-heptane	[COC2MPyr][FAP]	298.15	0.485	0.053	0.462	0.252	0.748	0		0.479562	0.0693027	0.451136	0.296742	0.703258	0
15	thiophene	n-heptane	[COC2MPyr][FAP]	298.15	0.577	0.051	0.372	0.372	0.628	0		0.579449	0.0649805	0.355571	0.427819	0.572181	0
15	thiophene	n-heptane	[COC2MPyr][FAP]	298.15	0.618	0.051	0.331	0.436	0.564	0		0.655587	0.0318821	0.312531	0.464435	0.535565	0
15	thiophene	n-heptane	[COC2MPyr][FAP]	298.15	0.631	0.051	0.318	0.473	0.527	0		0.675098	0.0327188	0.292183	0.509095	0.490905	0
15	thiophene	n-heptane	[COC2MPyr][FAP]	298.15	0.671	0.049	0.28	0.573	0.427	0		0.71126	0.0330071	0.255733	0.583451	0.416549	0
15	thiophene	n-heptane	[COC2MPyr][FAP]	298.15	0.707	0.046	0.247	0.657	0.343	0		0.749332	0.0303173	0.220351	0.675395	0.324605	0
15	thiophene	n-heptane	[COC2MPyr][FAP]	298.15	0.72	0.045	0.235	0.705	0.295	0		0.759937	0.0312784	0.208785	0.750386	0.249614	0
15	thiophene	n-heptane	[COC2MPyr][FAP]	298.15	0.764	0.04	0.196	0.818	0.182	0		0.798439	0.0271662	0.174395	0.816226	0.183774	0
15	thiophene	n-heptane	[COC2MPyr][FAP]	298.15	0.81	0.018	0.172	0.941	0.059	0		0.837286	0.0127571	0.149957	0.932971	0.0670289	0	0.0321	Song, Z.; Zhou, T.; Qi, Z.; Sundmacher, K. Extending the UNIFAC model for ionic liquid–solute systems by combining experimental and computational databases. AlChE J. 2019, DOI: 10.1002/aic.16821.
(c). {IL + alkene + alkane}
LLE system NO.	Composition of the ternary systems			T/K	Experimental LLE							Calculated LLE						RMSD	References
					Upper phase			Lower phase				Upper phase			Lower phase
	Component 1	Component 2	Component 3 (IL)		x1	x2	x3	x1	x2	x3		x1	x2	x3	x1	x2	x3
16	hex-1-ene	hexane	[C3CNPy][N(CN)2]	298.15	0.006	0	0.994	1	0	0		0.0200913	0	0.979909	1	0	1.7473e-21
16	hex-1-ene	hexane	[C3CNPy][N(CN)2]	298.15	0.006	0	0.994	0.949	0.051	0		0.0225101	0	0.97749	0.950219	0.0497813	5.0418e-21
16	hex-1-ene	hexane	[C3CNPy][N(CN)2]	298.15	0.005	0.001	0.994	0.899	0.101	0		0.0238972	0.00135487	0.974748	0.90125	0.0987502	1.1661e-20
16	hex-1-ene	hexane	[C3CNPy][N(CN)2]	298.15	0.005	0	0.995	0.743	0.257	0		0.0274463	0	0.972554	0.749447	0.250553	2.2095e-20
16	hex-1-ene	hexane	[C3CNPy][N(CN)2]	298.15	0.004	0.001	0.995	0.567	0.433	0		0.0292153	0.00144408	0.969341	0.576965	0.423035	3.6442e-20
16	hex-1-ene	hexane	[C3CNPy][N(CN)2]	298.15	0.003	0.002	0.995	0.39	0.61	0		0.0285492	0.00277573	0.968675	0.401188	0.598812	4.5445e-20
16	hex-1-ene	hexane	[C3CNPy][N(CN)2]	298.15	0.001	0.003	0.996	0.227	0.773	0		0.0270006	0.00401363	0.968986	0.237683	0.762317	5.264e-20
16	hex-1-ene	hexane	[C3CNPy][N(CN)2]	298.15	0.001	0.002	0.997	0.089	0.911	0		0.0283534	0.00267774	0.968969	0.100819	0.899181	6.4483e-20
16	hex-1-ene	hexane	[C3CNPy][N(CN)2]	298.15	0	0.003	0.997	0.032	0.968	0		0.0296751	0.00397662	0.966348	0.041184	0.958816	8.6801e-20
16	hex-1-ene	hexane	[C3CNPy][N(CN)2]	298.15	0	0.002	0.998	0	1	0		0.0336658	0.00273167	0.963602	0.0094003	0.9906	1.2077e-19	0.0152	Song, Z.; Zhou, T.; Qi, Z.; Sundmacher, K. Extending the UNIFAC model for ionic liquid–solute systems by combining experimental and computational databases. AlChE J. 2019, DOI: 10.1002/aic.16821.
17	hex-1-ene	hexane	[C3CNMPyr][N(CN)2]	298.15	0.002	0.003	0.995	0.211	0.789	0		0.00478364	0.00384	0.991376	0.211	0.789	1.5704e-51
17	hex-1-ene	hexane	[C3CNMPyr][N(CN)2]	298.15	0.001	0.003	0.996	0.107	0.893	0		0.0042385	0.004491	0.991271	0.112552	0.887448	1.6605e-21
17	hex-1-ene	hexane	[C3CNMPyr][N(CN)2]	298.15	0	0.004	0.996	0.046	0.954	0		0.00397859	0.005793	0.990228	0.0502555	0.949745	2.1774e-20
17	hex-1-ene	hexane	[C3CNMPyr][N(CN)2]	298.15	0	0.003	0.997	0	1	0		0.00322048	0.0053977	0.991382	0.00892216	0.991078	2.5304e-19
17	hex-1-ene	hexane	[C3CNMPyr][N(CN)2]	298.15	0.01	0	0.99	1	0	0		0.0169659	0	0.983034	1	0	8.4434e-19
17	hex-1-ene	hexane	[C3CNMPyr][N(CN)2]	298.15	0.01	0	0.99	0.969	0.031	0		0.01689	0	0.98311	0.969188	0.0308122	2.9039e-18
17	hex-1-ene	hexane	[C3CNMPyr][N(CN)2]	298.15	0.009	0.001	0.99	0.902	0.098	0		0.0160464	0.00153125	0.982422	0.902373	0.0976267	6.8116e-18
17	hex-1-ene	hexane	[C3CNMPyr][N(CN)2]	298.15	0.009	0	0.991	0.805	0.195	0		0.0172249	0	0.982775	0.805831	0.194169	1.3631e-17
17	hex-1-ene	hexane	[C3CNMPyr][N(CN)2]	298.15	0.008	0.001	0.991	0.714	0.286	0		0.0178354	0.0017868	0.980378	0.715108	0.284892	3.1921e-17
17	hex-1-ene	hexane	[C3CNMPyr][N(CN)2]	298.15	0.006	0.002	0.992	0.544	0.456	0		0.0184441	0.00401338	0.977543	0.545018	0.454982	1.5093e-16	0.0048	Song, Z.; Zhou, T.; Qi, Z.; Sundmacher, K. Extending the UNIFAC model for ionic liquid–solute systems by combining experimental and computational databases. AlChE J. 2019, DOI: 10.1002/aic.16821.
18	1-hexene	n-hexane	[CH2=CHC1MIM][NTf2]	298.15	0	1	0	0	0.048	0.952		0	1	5.82105e-17	0	0.0663929	0.933607
18	1-hexene	n-hexane	[CH2=CHC1MIM][NTf2]	298.15	0.015	0.985	0	0.001	0.048	0.951		0.0143117	0.985688	1.69433e-14	0.00193364	0.0655489	0.932517
18	1-hexene	n-hexane	[CH2=CHC1MIM][NTf2]	298.15	0.051	0.949	0	0.005	0.046	0.949		0.050131	0.949869	1.59228e-13	0.00676426	0.0634307	0.929805
18	1-hexene	n-hexane	[CH2=CHC1MIM][NTf2]	298.15	0.13	0.87	0	0.013	0.042	0.945		0.128261	0.871739	1.05353e-12	0.0172672	0.0587773	0.923956
18	1-hexene	n-hexane	[CH2=CHC1MIM][NTf2]	298.15	0.208	0.792	0	0.02	0.039	0.941		0.204845	0.795155	3.07354e-12	0.0275378	0.0541628	0.918299
18	1-hexene	n-hexane	[CH2=CHC1MIM][NTf2]	298.15	0.283	0.717	0	0.028	0.035	0.937		0.279822	0.720178	6.74633e-12	0.0375932	0.0495835	0.912823
18	1-hexene	n-hexane	[CH2=CHC1MIM][NTf2]	298.15	0.395	0.605	0	0.039	0.03	0.931		0.391231	0.608769	1.70711e-11	0.0525859	0.0426421	0.904772
18	1-hexene	n-hexane	[CH2=CHC1MIM][NTf2]	298.15	0.476	0.524	0	0.048	0.026	0.926		0.472692	0.527308	3.01551e-11	0.0636271	0.0374435	0.898929
18	1-hexene	n-hexane	[CH2=CHC1MIM][NTf2]	298.15	0.524	0.476	0	0.054	0.023	0.923		0.521592	0.478408	4.11286e-11	0.0703019	0.0342652	0.895433
18	1-hexene	n-hexane	[CH2=CHC1MIM][NTf2]	298.15	0.601	0.399	0	0.062	0.019	0.919		0.598978	0.401022	6.47328e-11	0.0809572	0.0291362	0.889907
18	1-hexene	n-hexane	[CH2=CHC1MIM][NTf2]	298.15	0.656	0.344	0	0.067	0.017	0.916		0.653571	0.346429	8.71031e-11	0.0885552	0.0254375	0.886007
18	1-hexene	n-hexane	[CH2=CHC1MIM][NTf2]	298.15	0.723	0.277	0	0.074	0.014	0.912		0.720752	0.279248	1.22768e-10	0.0980139	0.0207851	0.881201
18	1-hexene	n-hexane	[CH2=CHC1MIM][NTf2]	298.15	0.753	0.247	0	0.077	0.012	0.911		0.751259	0.248741	1.42455e-10	0.102354	0.0186329	0.879013
18	1-hexene	n-hexane	[CH2=CHC1MIM][NTf2]	298.15	0.84	0.16	0	0.087	0.007	0.906		0.839587	0.160413	2.14358e-10	0.1151	0.0122496	0.872651
18	1-hexene	n-hexane	[CH2=CHC1MIM][NTf2]	298.15	0.921	0.079	0	0.094	0.004	0.902		0.920218	0.0797819	3.03538e-10	0.126998	0.00620634	0.866795
18	1-hexene	n-hexane	[CH2=CHC1MIM][NTf2]	298.15	0.979	0.021	0	0.1	0.001	0.899		0.978844	0.0211556	3.85771e-10	0.135831	0.00166904	0.8625
18	1-hexene	n-hexane	[CH2=CHC1MIM][NTf2]	298.15	1	0	0	0.101	0	0.899		1	0	4.19579e-10	0.139058	0	0.860942	0.015	Song, Z.; Zhou, T.; Qi, Z.; Sundmacher, K. Extending the UNIFAC model for ionic liquid–solute systems by combining experimental and computational databases. AlChE J. 2019, DOI: 10.1002/aic.16821.
19	1-hexene	n-hexane	[CH2=CHC1MIm][N(CN)2]	298.15	0	0.005	0.995	0	1	0		0	0.00862364	0.991376	1.6605e-21	1	1.6605e-21
19	1-hexene	n-hexane	[CH2=CHC1MIm][N(CN)2]	298.15	0.001	0.005	0.994	0.032	0.968	0		0.001497	0.009223	0.98928	0.0317057	0.968294	2.1774e-20
19	1-hexene	n-hexane	[CH2=CHC1MIm][N(CN)2]	298.15	0.001	0.006	0.993	0.106	0.894	0		0.00144825	0.011306	0.987246	0.105607	0.894393	2.5304e-19
19	1-hexene	n-hexane	[CH2=CHC1MIm][N(CN)2]	298.15	0.002	0.005	0.993	0.13	0.87	0		0.00359847	0.00899717	0.987404	0.128444	0.871556	8.4434e-19
19	1-hexene	n-hexane	[CH2=CHC1MIm][N(CN)2]	298.15	0.003	0.004	0.993	0.193	0.807	0		0.00438198	0.00960506	0.986013	0.192198	0.807802	2.9039e-18
19	1-hexene	n-hexane	[CH2=CHC1MIm][N(CN)2]	298.15	0.004	0.004	0.992	0.22	0.78	0		0.0066188	0.00828512	0.985096	0.217906	0.782094	6.8116e-18
19	1-hexene	n-hexane	[CH2=CHC1MIm][N(CN)2]	298.15	0.004	0.005	0.991	0.255	0.745	0		0.006125	0.0104603	0.983415	0.253275	0.746725	1.3631e-17
19	1-hexene	n-hexane	[CH2=CHC1MIm][N(CN)2]	298.15	0.005	0.004	0.991	0.315	0.685	0		0.00806667	0.00915823	0.982775	0.31263	0.68737	3.1921e-17
19	1-hexene	n-hexane	[CH2=CHC1MIm][N(CN)2]	298.15	0.006	0.004	0.99	0.358	0.642	0		0.0107208	0.00989064	0.979389	0.354961	0.645039	1.5093e-16
19	1-hexene	n-hexane	[CH2=CHC1MIm][N(CN)2]	298.15	0.007	0.004	0.989	0.417	0.583	0		0.0140468	0.0113669	0.974586	0.412015	0.587985	2.2653e-16
19	1-hexene	n-hexane	[CH2=CHC1MIm][N(CN)2]	298.15	0.008	0.004	0.988	0.466	0.534	0		0.0164674	0.0108491	0.972683	0.45946	0.54054	4.1672e-16
19	1-hexene	n-hexane	[CH2=CHC1MIm][N(CN)2]	298.15	0.009	0.004	0.987	0.499	0.501	0		0.0150804	0.0115261	0.973394	0.498248	0.501752	8.6996e-52
19	1-hexene	n-hexane	[CH2=CHC1MIm][N(CN)2]	298.15	0.01	0.003	0.987	0.538	0.462	0		0.013	0.00188237	0.985118	0.538	0.462	2.0567e-22
19	1-hexene	n-hexane	[CH2=CHC1MIm][N(CN)2]	298.15	0.012	0.002	0.986	0.63	0.37	0		0.0132312	0.00344523	0.983324	0.629992	0.370008	7.6635e-21
19	1-hexene	n-hexane	[CH2=CHC1MIm][N(CN)2]	298.15	0.013	0.002	0.985	0.701	0.299	0		0.0168038	0.00108155	0.982115	0.700818	0.299182	7.4286e-20
19	1-hexene	n-hexane	[CH2=CHC1MIm][N(CN)2]	298.15	0.013	0.002	0.985	0.728	0.272	0		0.016214	0.00222201	0.981564	0.727535	0.272465	4.0507e-19
19	1-hexene	n-hexane	[CH2=CHC1MIm][N(CN)2]	298.15	0.014	0.001	0.985	0.766	0.234	0		0.0182865	1.67728e-05	0.981697	0.765452	0.234548	1.6661e-18
19	1-hexene	n-hexane	[CH2=CHC1MIm][N(CN)2]	298.15	0.014	0.001	0.985	0.82	0.18	0		0.019876	0.000624416	0.9795	0.819405	0.180595	4.9837e-18
19	1-hexene	n-hexane	[CH2=CHC1MIm][N(CN)2]	298.15	0.015	0.001	0.984	0.861	0.139	0		0.0207675	2.25e-05	0.97921	0.860543	0.139457	1.1511e-17
19	1-hexene	n-hexane	[CH2=CHC1MIm][N(CN)2]	298.15	0.015	0.001	0.984	0.923	0.077	0		0.0230345	0.000879455	0.976086	0.922612	0.077388	1.9957e-17
19	1-hexene	n-hexane	[CH2=CHC1MIm][N(CN)2]	298.15	0.015	0.001	0.984	0.987	0.013	0		0.0221908	0.000382591	0.977427	0.986923	0.0130774	3.3721e-17
19	1-hexene	n-hexane	[CH2=CHC1MIm][N(CN)2]	298.15	0.016	0	0.984	0.996	0.004	0		0.0232	0.000132355	0.976668	0.995976	0.00402398	1.5704e-51	0.0046	Song, Z.; Zhou, T.; Qi, Z.; Sundmacher, K. Extending the UNIFAC model for ionic liquid–solute systems by combining experimental and computational databases. AlChE J. 2019, DOI: 10.1002/aic.16821.
20	hex-1-ene	hexane	[OHC3MMor][N(CN)2]	298.15	0.016	0	0.984	1	0	0		0.018307	0	0.98169	1	0	1.9547e-07
20	hex-1-ene	hexane	[OHC3MMor][N(CN)2]	298.15	0.016	0	0.984	0.957	0.043	0		0.017495	0.00026134	0.98224	0.95719	0.042815	1.5989e-07
20	hex-1-ene	hexane	[OHC3MMor][N(CN)2]	298.15	0.015	0.001	0.984	0.904	0.096	0		0.016485	0.00058363	0.98293	0.90348	0.096521	1.2324e-07
20	hex-1-ene	hexane	[OHC3MMor][N(CN)2]	298.15	0.014	0.002	0.984	0.837	0.163	0		0.015228	0.00098082	0.98379	0.83595	0.16405	8.7548e-08
20	hex-1-ene	hexane	[OHC3MMor][N(CN)2]	298.15	0.012	0.002	0.986	0.734	0.266	0		0.013343	0.001569	0.98509	0.73332	0.26668	5.0229e-08
20	hex-1-ene	hexane	[OHC3MMor][N(CN)2]	298.15	0.009	0.003	0.988	0.608	0.392	0		0.011046	0.0022727	0.98668	0.60675	0.39325	2.3489e-08
20	hex-1-ene	hexane	[OHC3MMor][N(CN)2]	298.15	0.006	0.004	0.99	0.477	0.523	0		0.0086748	0.0029844	0.98834	0.47511	0.52489	9.4373e-09
20	hex-1-ene	hexane	[OHC3MMor][N(CN)2]	298.15	0.004	0.005	0.991	0.356	0.644	0		0.0064929	0.0036259	0.98988	0.3539	0.6461	3.4443e-09
20	hex-1-ene	hexane	[OHC3MMor][N(CN)2]	298.15	0.003	0.006	0.991	0.26	0.74	0		0.0047621	0.0041259	0.99111	0.25821	0.74179	1.2824e-09
20	hex-1-ene	hexane	[OHC3MMor][N(CN)2]	298.15	0.002	0.006	0.992	0.107	0.893	0		0.0019929	0.0049095	0.9931	0.10689	0.89311	1.1479e-10
20	hex-1-ene	hexane	[OHC3MMor][N(CN)2]	298.15	0	0.007	0.993	0.055	0.945	0		0.0010104	0.0051829	0.99381	0.053947	0.94605	2.1915e-11
20	hex-1-ene	hexane	[OHC3MMor][N(CN)2]	298.15	0	0.007	0.993	0	1	0		0	0.0054614	0.99454	0	1	4.0052e-26	0.0176	Song, Z.; Zhou, T.; Qi, Z.; Sundmacher, K. Extending the UNIFAC model for ionic liquid–solute systems by combining experimental and computational databases. AlChE J. 2019, DOI: 10.1002/aic.16821.
21	hex-1-ene	hexane	[OHC3MIm][N(CN)2]	298.15	0.009	0	0.991	1	0	0		0.029984	0	0.97002	1	0	6.9562e-18
21	hex-1-ene	hexane	[OHC3MIm][N(CN)2]	298.15	0.008	0	0.992	0.965	0.035	0		0.028868	0.00044826	0.97068	0.96468	0.035317	5.828e-18
21	hex-1-ene	hexane	[OHC3MIm][N(CN)2]	298.15	0.008	0	0.992	0.873	0.127	0		0.025982	0.0015956	0.97242	0.87205	0.12795	3.5617e-18
21	hex-1-ene	hexane	[OHC3MIm][N(CN)2]	298.15	0.008	0	0.992	0.814	0.186	0		0.024164	0.0023096	0.97353	0.8128	0.1872	2.5365e-18
21	hex-1-ene	hexane	[OHC3MIm][N(CN)2]	298.15	0.007	0.001	0.992	0.701	0.299	0		0.020713	0.003647	0.97564	0.69866	0.30134	1.2347e-18
21	hex-1-ene	hexane	[OHC3MIm][N(CN)2]	298.15	0.007	0.001	0.992	0.619	0.381	0		0.018271	0.0045787	0.97715	0.61683	0.38317	6.8954e-19
21	hex-1-ene	hexane	[OHC3MIm][N(CN)2]	298.15	0.006	0.002	0.992	0.522	0.478	0		0.015386	0.0056636	0.97895	0.51933	0.48067	3.1278e-19
21	hex-1-ene	hexane	[OHC3MIm][N(CN)2]	298.15	0.004	0.003	0.993	0.412	0.588	0		0.01213	0.0068671	0.981	0.40872	0.59128	1.0669e-19
21	hex-1-ene	hexane	[OHC3MIm][N(CN)2]	298.15	0.003	0.002	0.995	0.324	0.676	0		0.0095624	0.0078011	0.98264	0.32136	0.67864	3.7197e-20
21	hex-1-ene	hexane	[OHC3MIm][N(CN)2]	298.15	0.002	0.003	0.995	0.235	0.765	0		0.006944	0.0087395	0.98432	0.2325	0.7675	9.3293e-21
21	hex-1-ene	hexane	[OHC3MIm][N(CN)2]	298.15	0.001	0.003	0.996	0.112	0.888	0		0.0033284	0.010012	0.98666	0.11069	0.88931	4.3834e-22
21	hex-1-ene	hexane	[OHC3MIm][N(CN)2]	298.15	0	0.004	0.996	0.043	0.957	0		0.0012707	0.010725	0.988	0.042059	0.95794	9.3745e-24
21	hex-1-ene	hexane	[OHC3MIm][N(CN)2]	298.15	0	0.003	0.997	0	1	0		0	0.011161	0.98884	0	1	1.1638e-53	0.0167	Song, Z.; Zhou, T.; Qi, Z.; Sundmacher, K. Extending the UNIFAC model for ionic liquid–solute systems by combining experimental and computational databases. AlChE J. 2019, DOI: 10.1002/aic.16821.
22	hex-1-ene	hexane	[OHC3Py][N(CN)2]	298.15	0.007	0	0.993	1	0	0		0.040181	0	0.95982	1	0	1.1812e-06
22	hex-1-ene	hexane	[OHC3Py][N(CN)2]	298.15	0.007	0	0.993	0.935	0.065	0		0.037375	0.0012005	0.96142	0.93407	0.065925	8.6617e-07
22	hex-1-ene	hexane	[OHC3Py][N(CN)2]	298.15	0.007	0	0.993	0.871	0.129	0		0.034663	0.0023489	0.96299	0.86935	0.13065	6.2683e-07
22	hex-1-ene	hexane	[OHC3Py][N(CN)2]	298.15	0.006	0.001	0.993	0.784	0.216	0		0.031006	0.0038786	0.96512	0.78065	0.21935	3.8846e-07
22	hex-1-ene	hexane	[OHC3Py][N(CN)2]	298.15	0.006	0.001	0.993	0.71	0.29	0		0.027988	0.0051251	0.96689	0.70633	0.29367	2.5064e-07
22	hex-1-ene	hexane	[OHC3Py][N(CN)2]	298.15	0.005	0.001	0.994	0.626	0.374	0		0.024598	0.0065073	0.9689	0.62188	0.37812	1.4484e-07
22	hex-1-ene	hexane	[OHC3Py][N(CN)2]	298.15	0.005	0.001	0.994	0.529	0.471	0		0.020753	0.0080521	0.9712	0.52509	0.47491	7.102e-08
22	hex-1-ene	hexane	[OHC3Py][N(CN)2]	298.15	0.004	0.002	0.994	0.47	0.53	0		0.018397	0.0089863	0.97262	0.46543	0.53457	4.3203e-08
22	hex-1-ene	hexane	[OHC3Py][N(CN)2]	298.15	0.002	0.003	0.995	0.376	0.624	0		0.01467	0.010446	0.97488	0.37068	0.62932	1.7325e-08
22	hex-1-ene	hexane	[OHC3Py][N(CN)2]	298.15	0.002	0.003	0.995	0.295	0.705	0		0.011527	0.011659	0.97681	0.29067	0.70933	6.7573e-09
22	hex-1-ene	hexane	[OHC3Py][N(CN)2]	298.15	0.002	0.002	0.996	0.219	0.781	0		0.0085919	0.012777	0.97863	0.21609	0.78391	2.2463e-09
22	hex-1-ene	hexane	[OHC3Py][N(CN)2]	298.15	0.001	0.003	0.996	0.12	0.88	0		0.0047139	0.014233	0.98105	0.11801	0.88199	2.7698e-10
22	hex-1-ene	hexane	[OHC3Py][N(CN)2]	298.15	0	0.004	0.996	0.049	0.951	0		0.0019132	0.015269	0.98282	0.047701	0.9523	1.7336e-11
22	hex-1-ene	hexane	[OHC3Py][N(CN)2]	298.15	0	0.003	0.997	0	1	0		0	0.01597	0.98403	0	1	2.1054e-26	0.0128	Song, Z.; Zhou, T.; Qi, Z.; Sundmacher, K. Extending the UNIFAC model for ionic liquid–solute systems by combining experimental and computational databases. AlChE J. 2019, DOI: 10.1002/aic.16821.
23	cyclohexene	cyclohexane	[CH2=CHC1MIM][NTf2]	298.15	0	0.076	0.924	0	1	0		0.0263	0.050701	0.92299	3.4774e-37	1	3.4774e-37
23	cyclohexene	cyclohexane	[CH2=CHC1MIM][NTf2]	298.15	0.007	0.074	0.919	0.051	0.949	0		0.0224	0.050208	0.92741	0.08485	0.91515	1.0776e-21
23	cyclohexene	cyclohexane	[CH2=CHC1MIM][NTf2]	298.15	0.021	0.068	0.911	0.139	0.861	0		0.0293	0.043345	0.9277	0.15307	0.84693	6.7126e-21
23	cyclohexene	cyclohexane	[CH2=CHC1MIM][NTf2]	298.15	0.032	0.064	0.904	0.216	0.784	0		0.0049	0.045747	0.94944	0.23974	0.76026	1.529e-20
23	cyclohexene	cyclohexane	[CH2=CHC1MIM][NTf2]	298.15	0.048	0.057	0.895	0.315	0.685	0		0.0055	0.035708	0.95877	0.3777	0.6223	3.2021e-20
23	cyclohexene	cyclohexane	[CH2=CHC1MIM][NTf2]	298.15	0.064	0.051	0.885	0.417	0.583	0		0.0267	0.025285	0.948	0.4832	0.5168	5.6029e-20
23	cyclohexene	cyclohexane	[CH2=CHC1MIM][NTf2]	298.15	0.08	0.042	0.878	0.514	0.486	0		0.00726	0.05504	0.9377	0.5592	0.4408	8.6081e-20
23	cyclohexene	cyclohexane	[CH2=CHC1MIM][NTf2]	298.15	0.093	0.036	0.871	0.588	0.412	0		0.023014	0.047086	0.9299	0.6065	0.3935	1.1349e-19
23	cyclohexene	cyclohexane	[CH2=CHC1MIM][NTf2]	298.15	0.096	0.035	0.869	0.606	0.394	0		0.026794	0.045166	0.92804	0.6554	0.3446	1.206e-19
23	cyclohexene	cyclohexane	[CH2=CHC1MIM][NTf2]	298.15	0.102	0.031	0.867	0.639	0.361	0		0.034016	0.041484	0.9245	0.66269	0.33731	1.3471e-19
23	cyclohexene	cyclohexane	[CH2=CHC1MIM][NTf2]	298.15	0.11	0.028	0.862	0.696	0.304	0		0.045901	0.035379	0.91872	0.7388	0.2612	1.5937e-19
23	cyclohexene	cyclohexane	[CH2=CHC1MIM][NTf2]	298.15	0.123	0.02	0.857	0.77	0.23	0		0.062167	0.026953	0.91088	0.7913	0.2087	1.9549e-19
23	cyclohexene	cyclohexane	[CH2=CHC1MIM][NTf2]	298.15	0.136	0.012	0.852	0.864	0.136	0		0.082627	0.016223	0.90115	0.88039	0.11961	2.4372e-19
23	cyclohexene	cyclohexane	[CH2=CHC1MIM][NTf2]	298.15	0.146	0.004	0.85	0.947	0.053	0		0.101197	0.006363	0.89244	0.95895	0.04105	2.8855e-19
23	cyclohexene	cyclohexane	[CH2=CHC1MIM][NTf2]	298.15	0.152	0	0.848	0.998	0.002	0		0.112634	0.00022566	0.88714	0.998596	0.0014041	3.1593e-19	0.0356	Song, Z.; Zhou, T.; Qi, Z.; Sundmacher, K. Extending the UNIFAC model for ionic liquid–solute systems by combining experimental and computational databases. AlChE J. 2019, DOI: 10.1002/aic.16821.
24	cyclohexene	cyclohexane	[OHC3MIm][N(CN)2]	298.15	0.028	0	0.972	1	0	0		0.0604783	0	0.939522	0.999999	0	1.1812e-06
24	cyclohexene	cyclohexane	[OHC3MIm][N(CN)2]	298.15	0.027	0	0.973	0.962	0.038	0		0.0579439	0	0.942056	0.961458	0.0385408	8.6617e-07
24	cyclohexene	cyclohexane	[OHC3MIm][N(CN)2]	298.15	0.026	0.001	0.973	0.878	0.122	0		0.0506654	0.00574014	0.943594	0.876439	0.12356	6.2683e-07
24	cyclohexene	cyclohexane	[OHC3MIm][N(CN)2]	298.15	0.024	0.003	0.973	0.758	0.242	0		0.0383006	0.0160179	0.945682	0.754246	0.245753	3.8846e-07
24	cyclohexene	cyclohexane	[OHC3MIm][N(CN)2]	298.15	0.022	0.004	0.974	0.677	0.323	0		0.031803	0.0198074	0.94839	0.672912	0.327088	2.5064e-07
24	cyclohexene	cyclohexane	[OHC3MIm][N(CN)2]	298.15	0.019	0.005	0.976	0.588	0.412	0		0.0228071	0.0258383	0.951355	0.583461	0.416539	1.4484e-07
24	cyclohexene	cyclohexane	[OHC3MIm][N(CN)2]	298.15	0.017	0.006	0.977	0.541	0.459	0		0.0174221	0.027988	0.95459	0.53719	0.46281	7.102e-08
24	cyclohexene	cyclohexane	[OHC3MIm][N(CN)2]	298.15	0.013	0.007	0.98	0.434	0.566	0		0.00664167	0.0344372	0.958921	0.42912	0.57088	4.3203e-08
24	cyclohexene	cyclohexane	[OHC3MIm][N(CN)2]	298.15	0.012	0.008	0.98	0.355	0.645	0		0.00661188	0.0332048	0.960183	0.349501	0.650499	1.7325e-08
24	cyclohexene	cyclohexane	[OHC3MIm][N(CN)2]	298.15	0.009	0.009	0.982	0.29	0.71	0		0.0125591	0.0233933	0.964048	0.285639	0.714361	6.7573e-09
24	cyclohexene	cyclohexane	[OHC3MIm][N(CN)2]	298.15	0.006	0.01	0.984	0.211	0.789	0		0.00981072	0.02335	0.966839	0.20806	0.79194	2.2463e-09
24	cyclohexene	cyclohexane	[OHC3MIm][N(CN)2]	298.15	0.005	0.011	0.984	0.153	0.847	0		0.00037138	0.0303985	0.96923	0.151085	0.848915	2.7698e-10
24	cyclohexene	cyclohexane	[OHC3MIm][N(CN)2]	298.15	0.001	0.013	0.986	0.063	0.937	0		0.00177232	0.0272474	0.97098	0.0617191	0.938281	1.7336e-11
24	cyclohexene	cyclohexane	[OHC3MIm][N(CN)2]	298.15	0	0.013	0.987	0	1	0		0.00632184	0.0195181	0.97416	2.1054e-26	1	2.1054e-26	0.0132	Song, Z.; Zhou, T.; Qi, Z.; Sundmacher, K. Extending the UNIFAC model for ionic liquid–solute systems by combining experimental and computational databases. AlChE J. 2019, DOI: 10.1002/aic.16821.
25	cyclohexene	cyclohexane	[OHC3Py][N(CN)2]	298.15	0.029	0	0.971	1	0	0		0.077843	0	0.92216	1	0	8.1542e-07
25	cyclohexene	cyclohexane	[OHC3Py][N(CN)2]	298.15	0.027	0.001	0.972	0.914	0.086	0		0.070565	0.0035326	0.9259	0.91234	0.087656	5.3771e-07
25	cyclohexene	cyclohexane	[OHC3Py][N(CN)2]	298.15	0.024	0.002	0.974	0.806	0.194	0		0.061674	0.007798	0.93053	0.80296	0.19704	3.0425e-07
25	cyclohexene	cyclohexane	[OHC3Py][N(CN)2]	298.15	0.022	0.002	0.976	0.722	0.278	0		0.054963	0.010981	0.93406	0.71885	0.28115	1.8753e-07
25	cyclohexene	cyclohexane	[OHC3Py][N(CN)2]	298.15	0.019	0.004	0.977	0.633	0.367	0		0.047849	0.014321	0.93783	0.6284	0.3716	1.0537e-07
25	cyclohexene	cyclohexane	[OHC3Py][N(CN)2]	298.15	0.015	0.005	0.98	0.516	0.484	0		0.038741	0.018545	0.94271	0.51094	0.48906	4.4461e-08
25	cyclohexene	cyclohexane	[OHC3Py][N(CN)2]	298.15	0.011	0.006	0.983	0.411	0.589	0		0.030667	0.022241	0.94709	0.40555	0.59445	1.7546e-08
25	cyclohexene	cyclohexane	[OHC3Py][N(CN)2]	298.15	0.009	0.007	0.984	0.323	0.677	0		0.024031	0.025243	0.95073	0.31827	0.68173	6.861e-09
25	cyclohexene	cyclohexane	[OHC3Py][N(CN)2]	298.15	0.006	0.008	0.986	0.228	0.772	0		0.016891	0.028437	0.95467	0.2239	0.7761	1.8713e-09
25	cyclohexene	cyclohexane	[OHC3Py][N(CN)2]	298.15	0.004	0.009	0.987	0.15	0.85	0		0.011091	0.031006	0.9579	0.14704	0.85296	4.3493e-10
25	cyclohexene	cyclohexane	[OHC3Py][N(CN)2]	298.15	0.002	0.009	0.989	0.065	0.935	0		0.00482	0.033756	0.96142	0.063874	0.93613	3.2034e-11
25	cyclohexene	cyclohexane	[OHC3Py][N(CN)2]	298.15	0	0.01	0.99	0	1	0		0	0.035851	0.96415	0	1	2.4407e-26	0.0201	Song, Z.; Zhou, T.; Qi, Z.; Sundmacher, K. Extending the UNIFAC model for ionic liquid–solute systems by combining experimental and computational databases. AlChE J. 2019, DOI: 10.1002/aic.16821.
26	cyclohexane	cyclohexene	[C3CNPy][N(CN)2]	298.15	0	0.021	0.979	0	1	0		0	0.078893	0.92111	0	1	4.9612e-06
26	cyclohexane	cyclohexene	[C3CNPy][N(CN)2]	298.15	0.001	0.02	0.979	0.11	0.89	0		0.0037154	0.069228	0.92706	0.11343	0.88657	2.8575e-06
26	cyclohexane	cyclohexene	[C3CNPy][N(CN)2]	298.15	0.002	0.017	0.981	0.21	0.79	0		0.0069364	0.060727	0.93234	0.21597	0.78402	1.65e-06
26	cyclohexane	cyclohexene	[C3CNPy][N(CN)2]	298.15	0.003	0.014	0.983	0.402	0.598	0		0.012713	0.045178	0.94211	0.40951	0.59049	4.8867e-07
26	cyclohexane	cyclohexene	[C3CNPy][N(CN)2]	298.15	0.004	0.01	0.986	0.542	0.458	0		0.0167	0.034201	0.9491	0.55004	0.44996	1.6137e-07
26	cyclohexane	cyclohexene	[C3CNPy][N(CN)2]	298.15	0.005	0.006	0.989	0.726	0.274	0		0.021662	0.020235	0.9581	0.73225	0.26775	2.232e-08
26	cyclohexane	cyclohexene	[C3CNPy][N(CN)2]	298.15	0.006	0.002	0.992	0.891	0.109	0		0.02592	0.0079646	0.96611	0.89435	0.10565	9.5307e-10
26	cyclohexane	cyclohexene	[C3CNPy][N(CN)2]	298.15	0.006	0.002	0.992	0.953	0.047	0		0.027444	0.0035052	0.96905	0.95349	0.046513	8.5173e-11
26	cyclohexane	cyclohexene	[C3CNPy][N(CN)2]	298.15	0.006	0	0.994	1	0	0		0.028634	0	0.97137	1	0	1.6235e-25	0.0219	Song, Z.; Zhou, T.; Qi, Z.; Sundmacher, K. Extending the UNIFAC model for ionic liquid–solute systems by combining experimental and computational databases. AlChE J. 2019, DOI: 10.1002/aic.16821.
(d). {IL + alcohol + alkane/alkene/ester}
LLE system NO.	Composition of the ternary systems			T/K	Experimental LLE							Calculated LLE						RMSD	References
					Upper phase			Lower phase				Upper phase			Lower phase
	Component 1	Component 2	Component 3 (IL)		x1	x2	x3	x1	x2	x3		x1	x2	x3	x1	x2	x3
27	methanol	n-heptane	[COC2MMor][NTf2]	298.15	0	0.016	0.984	0	1	0		0.00233044	0.0220909	0.975579	8.203e-08	1	8.203e-08
27	methanol	n-heptane	[COC2MMor][NTf2]	298.15	0.061	0.016	0.923	0.007	0.993	0		0.0579395	0.0159373	0.926123	0.0101567	0.989843	9.0712e-08
27	methanol	n-heptane	[COC2MMor][NTf2]	298.15	0.136	0.015	0.849	0.008	0.992	0		0.122573	0.0109333	0.866494	0.0203399	0.97966	9.938e-08
27	methanol	n-heptane	[COC2MMor][NTf2]	298.15	0.407	0.013	0.58	0.009	0.991	0		0.39521	0.00843752	0.596353	0.0264799	0.97352	1.0251e-07
27	methanol	n-heptane	[COC2MMor][NTf2]	298.15	0.569	0.015	0.416	0.018	0.982	0		0.562362	0.00931212	0.428326	0.0355292	0.964471	1.0259e-07
27	methanol	n-heptane	[COC2MMor][NTf2]	298.15	0.657	0.015	0.328	0.027	0.973	0		0.652019	0.00991773	0.338063	0.0476	0.9524	1.0374e-07
27	methanol	n-heptane	[COC2MMor][NTf2]	298.15	0.757	0.018	0.225	0.042	0.958	0		0.756896	0.0093855	0.233718	0.0652601	0.93474	1.0339e-07
27	methanol	n-heptane	[COC2MMor][NTf2]	298.15	0.831	0.02	0.149	0.049	0.951	0		0.835446	0.00964	0.154914	0.071946	0.928054	1.0135e-07
27	methanol	n-heptane	[COC2MMor][NTf2]	298.15	0.839	0.021	0.14	0.05	0.95	0		0.844443	0.0100135	0.145544	0.072732	0.927268	1.0085e-07
27	methanol	n-heptane	[COC2MMor][NTf2]	298.15	0.853	0.022	0.125	0.053	0.947	0		0.860351	0.00908769	0.130561	0.0770152	0.922985	9.4253e-08
27	methanol	n-heptane	[COC2MMor][NTf2]	298.15	0.887	0.03	0.083	0.075	0.925	0		0.900947	0.0118956	0.0871578	0.101846	0.898154	8.691e-08
27	methanol	n-heptane	[COC2MMor][NTf2]	298.15	0.918	0.047	0.035	0.103	0.897	0		0.944532	0.0187948	0.0366736	0.127334	0.872666	8.3732e-08
27	methanol	n-heptane	[COC2MMor][NTf2]	298.15	0.915	0.076	0.009	0.133	0.867	0		0.961043	0.0295749	0.00938166	0.151693	0.848307	8.135e-08
27	methanol	n-heptane	[COC2mPip][NTf2]	298.15	0.899	0.101	0	0.152	0.848	0		0.959315	0.040685	0	0.171843	0.828157	7.4826e-08	0.0178	Song, Z.; Zhou, T.; Qi, Z.; Sundmacher, K. Extending the UNIFAC model for ionic liquid–solute systems by combining experimental and computational databases. AlChE J. 2019, DOI: 10.1002/aic.16821.
28	methanol	n-heptane	[COC2mPip][NTf2]	298.15	0	0.039	0.961	0	1	0		0.00778912	0.0153606	0.97685	0.0244942	0.975506	7.2889e-08
28	methanol	n-heptane	[COC2mPip][NTf2]	298.15	0.055	0.038	0.907	0.008	0.992	0		0.0306898	0.0158359	0.953474	0.0362465	0.963753	6.1747e-08
28	methanol	n-heptane	[COC2mPip][NTf2]	298.15	0.168	0.037	0.795	0.01	0.99	0		0.144385	0.0166253	0.83899	0.03878	0.96122	4.0741e-08
28	methanol	n-heptane	[COC2mPip][NTf2]	298.15	0.382	0.035	0.583	0.011	0.989	0		0.366524	0.0169584	0.616518	0.0415595	0.95844	3.3284e-08
28	methanol	n-heptane	[COC2mPip][NTf2]	298.15	0.497	0.031	0.472	0.014	0.986	0		0.510052	0.0209762	0.468971	0.0453379	0.954662	7.2512e-09
28	methanol	n-heptane	[COC2mPip][NTf2]	298.15	0.609	0.031	0.36	0.022	0.978	0		0.617646	0.0223182	0.360036	0.0822716	0.917728	0
28	methanol	n-heptane	[COC2mPip][NTf2]	298.15	0.688	0.03	0.282	0.03	0.97	0		0.690096	0.0230943	0.28681	0.0300004	0.969961	3.8406e-05
28	methanol	n-heptane	[COC2mPip][NTf2]	298.15	0.784	0.032	0.184	0.049	0.951	0		0.789223	0.0213222	0.189455	0.0530051	0.946957	3.7848e-05
28	methanol	n-heptane	[COC2mPip][NTf2]	298.15	0.855	0.035	0.11	0.063	0.937	0		0.86468	0.0209059	0.114414	0.0730601	0.926903	3.6516e-05
28	methanol	n-heptane	[COC2mPip][NTf2]	298.15	0.862	0.036	0.102	0.068	0.932	0		0.87272	0.0211376	0.106142	0.0801436	0.919821	3.5421e-05
28	methanol	n-heptane	[COC2mPip][NTf2]	298.15	0.9	0.041	0.059	0.077	0.923	0		0.914978	0.0235045	0.0615179	0.0903397	0.909625	3.4982e-05
28	methanol	n-heptane	[COC2mPip][NTf2]	298.15	0.915	0.059	0.026	0.114	0.886	0		0.942445	0.030343	0.0272119	0.129066	0.870901	3.2398e-05
28	methanol	n-heptane	[COC2mPip][NTf2]	298.15	0.909	0.082	0.009	0.139	0.861	0		0.949594	0.040995	0.0094108	0.15359	0.846379	3.093e-05
28	methanol	n-heptane	[COC2mPyr][NTf2]	298.15	0.899	0.101	0	0.152	0.848	0		0.949637	0.0503632	0	0.165363	0.834606	3.0489e-05	0.0214	Song, Z.; Zhou, T.; Qi, Z.; Sundmacher, K. Extending the UNIFAC model for ionic liquid–solute systems by combining experimental and computational databases. AlChE J. 2019, DOI: 10.1002/aic.16821.
29	methanol	n-heptane	[COC2mPyr][NTf2]	298.15	0	0.049	0.951	0	1	0		0.00099127	0.0228601	0.976149	0.0170939	0.982878	2.8552e-05
29	methanol	n-heptane	[COC2mPyr][NTf2]	298.15	0.04	0.043	0.917	0.007	0.993	0		0.0201306	0.0183346	0.961535	0.0255615	0.974416	2.2836e-05
29	methanol	n-heptane	[COC2mPyr][NTf2]	298.15	0.225	0.032	0.743	0.01	0.99	0		0.206623	0.0131927	0.780184	0.0290652	0.970914	2.035e-05
29	methanol	n-heptane	[COC2mPyr][NTf2]	298.15	0.37	0.027	0.603	0.014	0.986	0		0.354469	0.0109381	0.634593	0.0345577	0.965424	1.7892e-05
29	methanol	n-heptane	[COC2mPyr][NTf2]	298.15	0.519	0.025	0.456	0.017	0.983	0		0.509751	0.0100949	0.480154	0.0378463	0.962138	1.5667e-05
29	methanol	n-heptane	[COC2mPyr][NTf2]	298.15	0.622	0.026	0.352	0.025	0.975	0		0.62123	0.0107719	0.367998	0.0403533	0.959632	1.4614e-05
29	methanol	n-heptane	[COC2mPyr][NTf2]	298.15	0.732	0.027	0.241	0.035	0.965	0		0.736514	0.0113645	0.252122	0.0509531	0.949035	1.2328e-05
29	methanol	n-heptane	[COC2mPyr][NTf2]	298.15	0.805	0.029	0.166	0.047	0.953	0		0.813893	0.0146898	0.171417	0.0539838	0.946011	4.8206e-06
29	methanol	n-heptane	[COC2mPyr][NTf2]	298.15	0.81	0.03	0.16	0.051	0.949	0		0.820154	0.0181085	0.161738	0.0392624	0.960736	1.6158e-06
29	methanol	n-heptane	[COC2mPyr][NTf2]	298.15	0.831	0.032	0.137	0.056	0.944	0		0.838592	0.0230384	0.13837	0.0450238	0.954976	0
29	methanol	n-heptane	[COC2mPyr][NTf2]	298.15	0.892	0.037	0.071	0.08	0.92	0		0.898742	0.0294287	0.0718293	0.0799985	0.919982	1.987e-05
29	methanol	n-heptane	[COC2mPyr][NTf2]	298.15	0.914	0.052	0.034	0.102	0.898	0		0.931225	0.0340414	0.0347337	0.102819	0.897162	1.9029e-05
29	methanol	n-heptane	[COC2mPyr][NTf2]	298.15	0.911	0.077	0.012	0.137	0.863	0		0.946342	0.0412546	0.0124039	0.142727	0.857255	1.7467e-05
29	methanol	n-heptane	[COC2mPyr][NTf2]	298.15	0.899	0.101	0	0.152	0.848	0		0.947813	0.0521873	0	0.15913	0.840854	1.6949e-05	0.0168	Song, Z.; Zhou, T.; Qi, Z.; Sundmacher, K. Extending the UNIFAC model for ionic liquid–solute systems by combining experimental and computational databases. AlChE J. 2019, DOI: 10.1002/aic.16821.
30	methanol	n-heptane	[COC2MMor][FAP]	298.15	0	0.022	0.978	0	1	0		0.0160789	0.0166791	0.967242	8.6976e-52	1	8.6976e-52
30	methanol	n-heptane	[COC2MMor][FAP]	298.15	0.115	0.025	0.86	0.006	0.994	0		0.108381	0.0216448	0.869974	0.00547265	0.994527	4.1085e-18
30	methanol	n-heptane	[COC2MMor][FAP]	298.15	0.28	0.026	0.694	0.008	0.992	0		0.281413	0.0278228	0.690764	0.00888732	0.991113	2.2871e-16
30	methanol	n-heptane	[COC2MMor][FAP]	298.15	0.377	0.025	0.598	0.009	0.991	0		0.376095	0.030171	0.593734	0.0202637	0.979736	3.1729e-15
30	methanol	n-heptane	[COC2MMor][FAP]	298.15	0.38	0.026	0.594	0.009	0.991	0		0.376438	0.0281667	0.595396	0.0238091	0.976191	1.0133e-14
30	methanol	n-heptane	[COC2MMor][FAP]	298.15	0.449	0.022	0.529	0.01	0.99	0		0.436675	0.0214917	0.541833	0.0482334	0.951767	3.7469e-14
30	methanol	n-heptane	[COC2MMor][FAP]	298.15	0.553	0.024	0.423	0.014	0.986	0		0.542802	0.0240295	0.433168	0.0700608	0.929939	9.9393e-14
30	methanol	n-heptane	[COC2MMor][FAP]	298.15	0.617	0.024	0.359	0.019	0.981	0		0.604702	0.0229617	0.372337	0.112575	0.887425	3.1518e-13
30	methanol	n-heptane	[COC2MMor][FAP]	298.15	0.627	0.024	0.349	0.02	0.98	0		0.612392	0.0224512	0.365157	0.166895	0.833105	1.0208e-12
30	methanol	n-heptane	[COC2MMor][FAP]	298.15	0.709	0.026	0.265	0.026	0.974	0		0.693058	0.0234238	0.283518	0.0480673	0.951933	2.9956e-17
30	methanol	n-heptane	[COC2MMor][FAP]	298.15	0.76	0.027	0.213	0.028	0.972	0		0.751367	0.024136	0.224497	0.064808	0.935192	8.958e-16
30	methanol	n-heptane	[COC2MMor][FAP]	298.15	0.776	0.027	0.197	0.032	0.968	0		0.769336	0.0239609	0.206703	0.0835339	0.916466	6.3694e-15
30	methanol	n-heptane	[COC2MMor][FAP]	298.15	0.785	0.028	0.187	0.039	0.961	0		0.780465	0.0254971	0.194038	0.10232	0.89768	3.8952e-14
30	methanol	n-heptane	[COC2MMor][FAP]	298.15	0.811	0.028	0.161	0.041	0.959	0		0.806795	0.0259629	0.167242	0.131643	0.868357	1.3973e-13
30	methanol	n-heptane	[COC2MMor][FAP]	298.15	0.817	0.029	0.154	0.041	0.959	0		0.813251	0.0279041	0.158845	0.152328	0.847672	3.6766e-13
30	methanol	n-heptane	[COC2MMor][FAP]	298.15	0.849	0.03	0.121	0.043	0.957	0		0.846259	0.0296833	0.124058	0.160221	0.839779	6.461e-13
30	methanol	n-heptane	[COC2MMor][FAP]	298.15	0.889	0.036	0.075	0.053	0.947	0		0.9067	0.0167998	0.0765	0.053	0.947	1.2958e-27
30	methanol	n-heptane	[COC2MMor][FAP]	298.15	0.901	0.038	0.061	0.055	0.945	0		0.912209	0.0250947	0.0626964	0.0564042	0.943596	4.8206e-19
30	methanol	n-heptane	[COC2MMor][FAP]	298.15	0.919	0.069	0.012	0.125	0.875	0		0.93927	0.048268	0.0124618	0.134008	0.865992	1.5013e-17
30	methanol	n-heptane	[COC2MMor][FAP]	298.15	0.899	0.101	0	0.152	0.848	0		0.914547	0.0854533	0	0.17108	0.82892	1.7888e-16	0.0368	Song, Z.; Zhou, T.; Qi, Z.; Sundmacher, K. Extending the UNIFAC model for ionic liquid–solute systems by combining experimental and computational databases. AlChE J. 2019, DOI: 10.1002/aic.16821.
31	methanol	n-heptane	[COC2MPip][FAP]	298.15	0	0.069	0.931	0	1	0		0.0136926	0.030182	0.956125	0.0336335	0.966366	5.2422e-16
31	methanol	n-heptane	[COC2MPip][FAP]	298.15	0.11	0.069	0.821	0.005	0.995	0		0.0850633	0.0737049	0.841232	0.0786387	0.921361	3.7328e-15
31	methanol	n-heptane	[COC2MPip][FAP]	298.15	0.241	0.064	0.695	0.007	0.993	0		0.216403	0.0686381	0.714959	0.114855	0.885145	9.076e-15
31	methanol	n-heptane	[COC2MPip][FAP]	298.15	0.318	0.058	0.624	0.009	0.991	0		0.292415	0.0601808	0.647404	0.185995	0.814005	3.1715e-14
31	methanol	n-heptane	[COC2MPip][FAP]	298.15	0.345	0.057	0.598	0.009	0.991	0		0.320127	0.0340327	0.64584	0.009	0.991	2.0458e-22
31	methanol	n-heptane	[COC2MPip][FAP]	298.15	0.47	0.052	0.478	0.013	0.987	0		0.428447	0.0402938	0.53126	0.0220126	0.977987	9.629e-16
31	methanol	n-heptane	[COC2MPip][FAP]	298.15	0.524	0.049	0.427	0.016	0.984	0		0.516628	0.043462	0.43991	0.0245751	0.975425	2.0214e-14
31	methanol	n-heptane	[COC2MPip][FAP]	298.15	0.538	0.048	0.414	0.018	0.982	0		0.532863	0.041712	0.425425	0.0295283	0.970472	6.6133e-14
31	methanol	n-heptane	[COC2MPip][FAP]	298.15	0.593	0.047	0.36	0.02	0.98	0		0.58408	0.045006	0.370914	0.0513927	0.948607	3.3076e-13
31	methanol	n-heptane	[COC2MPip][FAP]	298.15	0.705	0.044	0.251	0.027	0.973	0		0.696505	0.0440968	0.259398	0.0873743	0.912626	9.6743e-13
31	methanol	n-heptane	[COC2MPip][FAP]	298.15	0.739	0.044	0.217	0.03	0.97	0		0.730332	0.0442115	0.225456	0.120685	0.879315	1.7084e-12
31	methanol	n-heptane	[COC2MPip][FAP]	298.15	0.768	0.044	0.188	0.032	0.968	0		0.759918	0.043904	0.196178	0.15941	0.84059	2.9573e-12
31	methanol	n-heptane	[COC2MPip][FAP]	298.15	0.791	0.044	0.165	0.035	0.965	0		0.783413	0.0441301	0.172457	0.194635	0.805365	4.3299e-12
31	methanol	n-heptane	[COC2MPip][FAP]	298.15	0.801	0.043	0.156	0.042	0.958	0		0.816395	0.0198054	0.1638	0.042	0.958	1.8365e-22
31	methanol	n-heptane	[COC2MPip][FAP]	298.15	0.822	0.043	0.135	0.045	0.955	0		0.829069	0.024267	0.146664	0.0567002	0.9433	3.2945e-15
31	methanol	n-heptane	[COC2MPip][FAP]	298.15	0.885	0.044	0.071	0.07	0.93	0		0.892934	0.0334154	0.0736507	0.0819112	0.918089	2.4515e-14
31	methanol	n-heptane	[COC2MPip][FAP]	298.15	0.912	0.052	0.036	0.1	0.9	0		0.918172	0.0449859	0.0368422	0.113261	0.886739	9.3303e-14
31	methanol	n-heptane	[COC2MPip][FAP]	298.15	0.899	0.101	0	0.152	0.848	0		0.906309	0.0936908	0	0.174027	0.825973	2.3387e-13	0.0459	Song, Z.; Zhou, T.; Qi, Z.; Sundmacher, K. Extending the UNIFAC model for ionic liquid–solute systems by combining experimental and computational databases. AlChE J. 2019, DOI: 10.1002/aic.16821.
32	methanol	n-heptane	[COC2MPyr][FAP]	298.15	0	0.054	0.946	0	1	0		0.0036321	0.02471	0.971658	0.0395153	0.960485	3.9526e-13
32	methanol	n-heptane	[COC2MPyr][FAP]	298.15	0.089	0.056	0.855	0.004	0.996	0		0.0828861	0.0442007	0.872913	0.0672201	0.93278	7.4852e-13
32	methanol	n-heptane	[COC2MPyr][FAP]	298.15	0.239	0.053	0.708	0.007	0.993	0		0.214121	0.0543067	0.731572	0.103157	0.896843	1.4967e-12
32	methanol	n-heptane	[COC2MPyr][FAP]	298.15	0.284	0.051	0.665	0.008	0.992	0		0.257842	0.0517264	0.690432	0.176125	0.823875	3.545e-12
32	methanol	n-heptane	[COC2MPyr][FAP]	298.15	0.287	0.051	0.662	0.008	0.992	0		0.278197	0.0200828	0.70172	0.008	0.992	2.782e-39
32	methanol	n-heptane	[COC2MPyr][FAP]	298.15	0.393	0.048	0.559	0.011	0.989	0		0.367694	0.019925	0.612381	0.0196725	0.980328	5.7478e-14
32	methanol	n-heptane	[COC2MPyr][FAP]	298.15	0.418	0.047	0.535	0.011	0.989	0		0.386947	0.0189107	0.594142	0.0303461	0.969654	2.706e-13
32	methanol	n-heptane	[COC2MPyr][FAP]	298.15	0.459	0.045	0.496	0.013	0.987	0		0.425726	0.0201375	0.554137	0.0540151	0.945985	1.2555e-12
32	methanol	n-heptane	[COC2MPyr][FAP]	298.15	0.472	0.045	0.483	0.014	0.986	0		0.439328	0.0215607	0.539112	0.0737375	0.926262	3.6341e-12
32	methanol	n-heptane	[COC2MPyr][FAP]	298.15	0.48	0.045	0.475	0.014	0.986	0		0.448643	0.0224185	0.528939	0.0861931	0.913807	7.7582e-12
32	methanol	n-heptane	[COC2MPyr][FAP]	298.15	0.477	0.045	0.478	0.014	0.986	0		0.444993	0.0246344	0.530373	0.109423	0.890577	1.9145e-11
32	methanol	n-heptane	[COC2MPyr][FAP]	298.15	0.521	0.044	0.435	0.017	0.983	0		0.49682	0.0284464	0.474734	0.136765	0.863235	6.5868e-11
32	methanol	n-heptane	[COC2MPyr][FAP]	298.15	0.57	0.042	0.388	0.021	0.979	0		0.5525	0.0322606	0.41524	0.170049	0.829951	2.2463e-10
32	methanol	n-heptane	[COC2MPyr][FAP]	298.15	0.661	0.04	0.299	0.027	0.973	0		0.622909	0.0601511	0.31694	0.027	0.973	2.5942e-39
32	methanol	n-heptane	[COC2MPyr][FAP]	298.15	0.68	0.039	0.281	0.032	0.968	0		0.66281	0.043368	0.293822	0.0413867	0.958613	6.1945e-14
32	methanol	n-heptane	[COC2MPyr][FAP]	298.15	0.711	0.038	0.251	0.034	0.966	0		0.698722	0.0370299	0.264248	0.0490398	0.95096	1.4503e-13
32	methanol	n-heptane	[COC2MPyr][FAP]	298.15	0.716	0.038	0.246	0.036	0.964	0		0.709196	0.0296447	0.26116	0.0623315	0.937669	4.7042e-13
32	methanol	n-heptane	[COC2MPyr][FAP]	298.15	0.772	0.038	0.19	0.043	0.957	0		0.772757	0.0239433	0.2033	0.084113	0.915887	1.4374e-12
32	methanol	n-heptane	[COC2MPyr][FAP]	298.15	0.827	0.039	0.134	0.047	0.953	0		0.835069	0.0194985	0.145433	0.106797	0.893203	3.8581e-12
32	methanol	n-heptane	[COC2MPyr][FAP]	298.15	0.901	0.043	0.056	0.056	0.944	0		0.918544	0.0199937	0.0614626	0.137434	0.862566	8.843e-12
32	methanol	n-heptane	[COC2MPyr][FAP]	298.15	0.918	0.054	0.028	0.105	0.895	0		0.944427	0.0247295	0.0308436	0.197824	0.802176	2.4065e-11
32	methanol	n-heptane	[COC2MPyr][FAP]	298.15	0.899	0.101	0	0.152	0.848	0		0.944473	0.0555265	0	0.255775	0.744225	8.5949e-11	0.0487	Song, Z.; Zhou, T.; Qi, Z.; Sundmacher, K. Extending the UNIFAC model for ionic liquid–solute systems by combining experimental and computational databases. AlChE J. 2019, DOI: 10.1002/aic.16821.
33	diisopropyl ether	2-propanol	[COC2Mmor][NTf2]	298.15	1	0	0	0.127	0	0.873		0.975757	0.0242297	1.33216e-05	0.0548061	0.0549079	0.890286
33	diisopropyl ether	2-propanol	[COC2Mmor][NTf2]	298.15	0.934	0.066	0	0.139	0.083	0.778		0.929143	0.0708302	2.64823e-05	0.0562757	0.127175	0.816549
33	diisopropyl ether	2-propanol	[COC2Mmor][NTf2]	298.15	0.84	0.159	0.001	0.149	0.175	0.676		0.854184	0.145748	6.74363e-05	0.0574557	0.193224	0.74932
33	diisopropyl ether	2-propanol	[COC2Mmor][NTf2]	298.15	0.793	0.206	0.001	0.153	0.207	0.64		0.813607	0.186289	0.000104371	0.0576946	0.215516	0.726789
33	diisopropyl ether	2-propanol	[COC2Mmor][NTf2]	298.15	0.766	0.233	0.001	0.153	0.223	0.624		0.790446	0.209423	0.000131532	0.0577465	0.225784	0.716469
33	diisopropyl ether	2-propanol	[COC2Mmor][NTf2]	298.15	0.722	0.277	0.001	0.155	0.246	0.599		0.751607	0.248205	0.000188919	0.0577272	0.240245	0.702027
33	diisopropyl ether	2-propanol	[COC2Mmor][NTf2]	298.15	0.585	0.412	0.003	0.158	0.31	0.532		0.632007	0.367505	0.000488581	0.0570257	0.273106	0.669869
33	diisopropyl ether	2-propanol	[COC2Mmor][NTf2]	298.15	0.573	0.424	0.003	0.158	0.319	0.523		0.621662	0.377813	0.000525316	0.0569221	0.275538	0.66754
33	diisopropyl ether	2-propanol	[COC2Mmor][NTf2]	298.15	0.477	0.516	0.007	0.155	0.36	0.485		0.541721	0.457397	0.000881989	0.0558423	0.293763	0.650394
33	diisopropyl ether	2-propanol	[COC2Mmor][NTf2]	298.15	0.41	0.582	0.008	0.152	0.397	0.451		0.486316	0.512468	0.00121556	0.0547276	0.306519	0.638754
33	diisopropyl ether	2-propanol	[COC2Mmor][NTf2]	298.15	0.364	0.625	0.011	0.147	0.429	0.424		0.451453	0.547081	0.00146683	0.0538215	0.314873	0.631305
33	diisopropyl ether	2-propanol	[COC2Mmor][NTf2]	298.15	0.358	0.631	0.011	0.146	0.431	0.423		0.446542	0.551953	0.00150496	0.053679	0.316078	0.630243
33	diisopropyl ether	2-propanol	[COC2Mmor][NTf2]	298.15	0.317	0.668	0.015	0.142	0.451	0.407		0.415406	0.582831	0.00176309	0.0526771	0.323909	0.623414
33	diisopropyl ether	2-propanol	[COC2Mmor][NTf2]	298.15	0.254	0.729	0.017	0.132	0.491	0.377		0.367654	0.630129	0.00221636	0.0507609	0.336682	0.612557
33	diisopropyl ether	2-propanol	[COC2Mmor][NTf2]	298.15	0.121	0.862	0.017	0.093	0.574	0.333		0.269864	0.72676	0.00337537	0.0448713	0.366598	0.588531
33	diisopropyl ether	2-propanol	[COC2Mmor][NTf2]	298.15	0.06	0.924	0.016	0.059	0.623	0.318		0.229442	0.766611	0.00394746	0.0413814	0.380806	0.577813
33	diisopropyl ether	2-propanol	[COC2Mmor][NTf2]	298.15	0.036	0.95	0.014	0.044	0.641	0.315		0.213165	0.782642	0.00419292	0.0397526	0.386881	0.573366
33	diisopropyl ether	2-propanol	[COC2Mmor][NTf2]	298.15	0	0.995	0.005	0	0.67	0.33		0.189659	0.805779	0.00456221	0.0371432	0.396045	0.566812	0.1121	Song, Z.; Zhou, T.; Qi, Z.; Sundmacher, K. Extending the UNIFAC model for ionic liquid–solute systems by combining experimental and computational databases. AlChE J. 2019, DOI: 10.1002/aic.16821.
34	diisopropyl ether	2-propanol	[COC2MPip][NTf2]	298.15	0.999	0	0.001	0.224	0	0.776		0.999969	0	3.06877e-05	0.0981199	0	0.90188
34	diisopropyl ether	3-propanol	[COC2MPip][NTf2]	298.15	0.952	0.047	0.001	0.245	0.085	0.67		0.959232	0.0407144	5.3927e-05	0.0990598	0.101008	0.799932
34	diisopropyl ether	4-propanol	[COC2MPip][NTf2]	298.15	0.898	0.101	0.001	0.249	0.151	0.6		0.910421	0.0894804	9.89907e-05	0.09996	0.177328	0.722712
34	diisopropyl ether	5-propanol	[COC2MPip][NTf2]	298.15	0.857	0.141	0.002	0.249	0.189	0.562		0.871993	0.127854	0.000152639	0.100388	0.217705	0.681907
34	diisopropyl ether	6-propanol	[COC2MPip][NTf2]	298.15	0.793	0.205	0.002	0.256	0.238	0.506		0.806595	0.19311	0.00029527	0.100595	0.264162	0.635243
34	diisopropyl ether	7-propanol	[COC2MPip][NTf2]	298.15	0.776	0.222	0.002	0.26	0.253	0.487		0.786244	0.2134	0.000356348	0.100549	0.275005	0.624446
34	diisopropyl ether	8-propanol	[COC2MPip][NTf2]	298.15	0.761	0.237	0.002	0.262	0.264	0.474		0.769515	0.230072	0.000413624	0.100478	0.283043	0.616479
34	diisopropyl ether	9-propanol	[COC2MPip][NTf2]	298.15	0.688	0.308	0.004	0.267	0.311	0.422		0.691901	0.30732	0.000779585	0.0997983	0.313341	0.586861
34	diisopropyl ether	10-propanol	[COC2MPip][NTf2]	298.15	0.635	0.36	0.005	0.269	0.346	0.385		0.634676	0.364144	0.0011807	0.0989391	0.331463	0.569598
34	diisopropyl ether	11-propanol	[COC2MPip][NTf2]	298.15	0.606	0.387	0.007	0.266	0.356	0.378		0.610183	0.388423	0.00139406	0.0984677	0.338707	0.562825
34	diisopropyl ether	12-propanol	[COC2MPip][NTf2]	298.15	0.519	0.468	0.013	0.271	0.42	0.309		0.520305	0.477257	0.00243799	0.0960464	0.364656	0.539297
34	diisopropyl ether	13-propanol	[COC2MPip][NTf2]	298.15	0.46	0.518	0.022	0.264	0.456	0.28		0.467691	0.529033	0.00327556	0.0939507	0.380397	0.525652
34	diisopropyl ether	14-propanol	[COC2MPip][NTf2]	298.15	0.361	0.577	0.062	0.262	0.509	0.229		0.39779	0.597507	0.00470315	0.0900293	0.403102	0.506869	0.0991	Song, Z.; Zhou, T.; Qi, Z.; Sundmacher, K. Extending the UNIFAC model for ionic liquid–solute systems by combining experimental and computational databases. AlChE J. 2019, DOI: 10.1002/aic.16821.
35	diisopropyl ether	2-propanol	[COC2MPyr][NTf2]	298.15	1	0	0	0.205	0	0.795		0.999868	0	0.000132238	0.0936312	0	0.906369
35	diisopropyl ether	2-propanol	[COC2MPyr][NTf2]	298.15	0.907	0.093	0	0.217	0.123	0.66		0.922827	0.0768642	0.00030835	0.0980204	0.148037	0.753943
35	diisopropyl ether	2-propanol	[COC2MPyr][NTf2]	298.15	0.83	0.169	0.001	0.22	0.201	0.579		0.843796	0.155562	0.000642438	0.100448	0.224204	0.675348
35	diisopropyl ether	2-propanol	[COC2MPyr][NTf2]	298.15	0.771	0.227	0.002	0.237	0.241	0.522		0.782834	0.216114	0.00105186	0.101276	0.259833	0.638891
35	diisopropyl ether	2-propanol	[COC2MPyr][NTf2]	298.15	0.739	0.259	0.002	0.239	0.263	0.498		0.747383	0.251249	0.0013676	0.101466	0.275625	0.622909
35	diisopropyl ether	2-propanol	[COC2MPyr][NTf2]	298.15	0.665	0.331	0.004	0.237	0.31	0.453		0.667057	0.330597	0.00234644	0.101298	0.304157	0.594545
35	diisopropyl ether	2-propanol	[COC2MPyr][NTf2]	298.15	0.588	0.407	0.005	0.253	0.353	0.394		0.588668	0.407592	0.00373968	0.100403	0.32748	0.572118
35	diisopropyl ether	2-propanol	[COC2MPyr][NTf2]	298.15	0.518	0.473	0.009	0.239	0.401	0.36		0.514563	0.479878	0.00555861	0.0987565	0.348842	0.552401
35	diisopropyl ether	2-propanol	[COC2MPyr][NTf2]	298.15	0.493	0.496	0.011	0.234	0.413	0.353		0.491579	0.502182	0.00623889	0.098039	0.355673	0.546288
35	diisopropyl ether	2-propanol	[COC2MPyr][NTf2]	298.15	0.455	0.531	0.014	0.236	0.438	0.326		0.455837	0.536744	0.00741903	0.0966773	0.366685	0.536637
35	diisopropyl ether	2-propanol	[COC2MPyr][NTf2]	298.15	0.423	0.558	0.019	0.241	0.463	0.296		0.42702	0.564493	0.00848687	0.095322	0.376012	0.528666
35	diisopropyl ether	2-propanol	[COC2MPyr][NTf2]	298.15	0.34	0.624	0.036	0.236	0.521	0.243		0.356445	0.631967	0.0115883	0.090743	0.401119	0.508138
35	diisopropyl ether	2-propanol	[COC2MPyr][NTf2]	298.15	0.3	0.644	0.056	0.232	0.555	0.213		0.325314	0.661489	0.013197	0.0879964	0.413471	0.498533	0.0972	Song, Z.; Zhou, T.; Qi, Z.; Sundmacher, K. Extending the UNIFAC model for ionic liquid–solute systems by combining experimental and computational databases. AlChE J. 2019, DOI: 10.1002/aic.16821.

## Sheet: Table S4
Table S4. Detailed binary LLE database used for UNIFAC-IL validation.
(a) {IL (1) + alkane/cycloalkane}
Composition of the ternary systems	T/K	x1		RMSD	References
		exp.	cal.
[C4MIm][SCN]+hexane
[C4MIm][SCN]+hexane	364.38	0.9305	0.953671
[C4MIm][SCN]+hexane	353.01	0.9453	0.953814
[C4MIm][SCN]+hexane	343.1	0.9555	0.953935
[C4MIm][SCN]+hexane	340.18	0.9589	0.95397
[C4MIm][SCN]+hexane	332.24	0.9645	0.954064
[C4MIm][SCN]+hexane	312.52	0.9715	0.954285
[C4MIm][SCN]+hexane	287.37	0.9769	0.954539
[C4MIm][SCN]+hexane	273.62	0.9801	0.954597
[C4MIm][SCN]+hexane	253.15	0.984	0.954663	0.0184	Domańska. U, Laskowska .MandPobudkowska A. Phase Equilibria Study of the Binary Systems (1-Butyl-3-methylimidazolium Thiocyanate Ionic Liquid + Organic Solvent, or Water). J. Phys. Chem. B 2009, 113, 6397-6404.
[C4MIm][SCN]+heptane
[C4MIm][SCN]+heptane	364.18	0.9594	0.972517
[C4MIm][SCN]+heptane	355.31	0.9666	0.972593
[C4MIm][SCN]+heptane	351.49	0.9708	0.972625
[C4MIm][SCN]+heptane	345.44	0.9759	0.972675
[C4MIm][SCN]+heptane	341.9	0.979	0.972704
[C4MIm][SCN]+heptane	334.45	0.9805	0.972764
[C4MIm][SCN]+heptane	324.68	0.9834	0.97284
[C4MIm][SCN]+heptane	309.31	0.986	0.972954
[C4MIm][SCN]+heptane	298.12	0.9879	0.973032
[C4MIm][SCN]+heptane	273.65	0.9906	0.973142
[C4MIm][SCN]+heptane	248.09	0.9939	0.973186	0.0119	Domańska. U, Laskowska .MandPobudkowska A. Phase Equilibria Study of the Binary Systems (1-Butyl-3-methylimidazolium Thiocyanate Ionic Liquid + Organic Solvent, or Water). J. Phys. Chem. B 2009, 113, 6397-6404.
[C4MIm][SCN]+octane
[C4MIm][SCN]+octane	387.84	0.9631	0.983188
[C4MIm][SCN]+octane	379.46	0.9703	0.98324
[C4MIm][SCN]+octane	366.79	0.9791	0.983315
[C4MIm][SCN]+octane	360.28	0.9826	0.983353
[C4MIm][SCN]+octane	353.21	0.9869	0.983394
[C4MIm][SCN]+octane	344.33	0.9905	0.983443
[C4MIm][SCN]+octane	328.64	0.9929	0.983528
[C4MIm][SCN]+octane	297.7	0.9958	0.983682	0.0105	Domańska, U.; Laskowska, M.; Pobudkowska, A. Phase Equilibria Study of the Binary Systems (1-Butyl-3-methylimidazolium Thiocyanate Ionic Liquid + Organic Solvent, or Water). J. Phys. Chem. B 2009, 113, 6397-6404.
[C4MIm][SCN]+nonane
[C4MIm][SCN]+nonane	422.97	0.9713	0.989452
[C4MIm][SCN]+nonane	417.28	0.9748	0.989477
[C4MIm][SCN]+nonane	411.31	0.9785	0.989504
[C4MIm][SCN]+nonane	394.12	0.9822	0.989578
[C4MIm][SCN]+nonane	375.09	0.9858	0.989657
[C4MIm][SCN]+nonane	360.99	0.9894	0.989714
[C4MIm][SCN]+nonane	346.84	0.9925	0.989769
[C4MIm][SCN]+nonane	332.46	0.995	0.989823
[C4MIm][SCN]+nonane	318.47	0.996	0.989872
[C4MIm][SCN]+nonane	303.21	0.9975	0.989923
[C4MIm][SCN]+nonane	288.15	0.9987	0.989969	0.0092	Domańska, U.; Laskowska, M.; Pobudkowska, A. Phase Equilibria Study of the Binary Systems (1-Butyl-3-methylimidazolium Thiocyanate Ionic Liquid + Organic Solvent, or Water). J. Phys. Chem. B 2009, 113, 6397-6404.
[C4MIm][SCN]+decane
[C4MIm][SCN]+decane	432.49	0.9831	0.993341
[C4MIm][SCN]+decane	416.4	0.9876	0.99339
[C4MIm][SCN]+decane	396.15	0.9901	0.99345
[C4MIm][SCN]+decane	381.13	0.9924	0.993493
[C4MIm][SCN]+decane	360.23	0.995	0.993551
[C4MIm][SCN]+decane	314.41	0.9986	0.993667	0.0054	Domańska, U.; Laskowska, M.; Pobudkowska, A. Phase Equilibria Study of the Binary Systems (1-Butyl-3-methylimidazolium Thiocyanate Ionic Liquid + Organic Solvent, or Water). J. Phys. Chem. B 2009, 113, 6397-6404.
[C6MIm][SCN]+decane
[C6MIm][SCN]+decane	310.4	0.9941	0.977989
[C6MIm][SCN]+decane	328.2	0.9903	0.977876
[C6MIm][SCN]+decane	346.5	0.9873	0.977799
[C6MIm][SCN]+decane	369.3	0.9829	0.977714
[C6MIm][SCN]+decane	384	0.9802	0.9776
[C6MIm][SCN]+decane	410.6	0.974	0.977523	0.0096	Domańska, U.; Kro´likowska, M.; Arasimowicz, M. Phase Equilibria of (1-Hexyl-3-methylimidazolium Thiocyanate + Water, Alcohol, or Hydrocarbon) Binary Systems. J. Chem. Eng. Data 2010, 55, 773–777.
[C6MIm][SCN]+nonane
[C6MIm][SCN]+nonane	312.15	0.9901	0.967498
[C6MIm][SCN]+nonane	341.85	0.9866	0.967323
[C6MIm][SCN]+nonane	368.69	0.9769	0.967146
[C6MIm][SCN]+nonane	396.4	0.9684	0.96695
[C6MIm][SCN]+nonane	416.8	0.9613	0.966799	0.0141	Domańska, U.; Kro´likowska, M.; Arasimowicz, M. Phase Equilibria of (1-Hexyl-3-methylimidazolium Thiocyanate + Water, Alcohol, or Hydrocarbon) Binary Systems. J. Chem. Eng. Data 2010, 55, 773–777.
[C6MIm][SCN]+octane
[C6MIm][SCN]+octane	284.7	0.9906	0.951813
[C6MIm][SCN]+octane	302.2	0.9843	0.951694
[C6MIm][SCN]+octane	310.1	0.982	0.951636
[C6MIm][SCN]+octane	318.1	0.9793	0.951576
[C6MIm][SCN]+octane	331.4	0.9732	0.951469
[C6MIm][SCN]+octane	339.2	0.9703	0.951404
[C6MIm][SCN]+octane	359.2	0.9676	0.95123
[C6MIm][SCN]+octane	363.2	0.9651	0.951194
[C6MIm][SCN]+octane	377.5	0.9537	0.951062
[C6MIm][SCN]+octane	389.1	0.9481	0.950952
[C6MIm][SCN]+octane	402.3	0.9402	0.950823	0.0227	Domańska, U.; Kro´likowska, M.; Arasimowicz, M. Phase Equilibria of (1-Hexyl-3-methylimidazolium Thiocyanate + Water, Alcohol, or Hydrocarbon) Binary Systems. J. Chem. Eng. Data 2010, 55, 773–777.
[C6MIm][SCN]+heptane
[C6MIm][SCN]+heptane	282.6	0.9839	0.927177
[C6MIm][SCN]+heptane	325.9	0.9673	0.926759
[C6MIm][SCN]+heptane	348.6	0.9535	0.926507
[C6MIm][SCN]+heptane	363.2	0.9401	0.926325
[C6MIm][SCN]+heptane	376	0.9279	0.926172
[C6MIm][SCN]+heptane	395	0.914	0.925927
[C6MIm][SCN]+heptane	408.8	0.9012	0.925756	0.0305	Domańska, U.; Kro´likowska, M.; Arasimowicz, M. Phase Equilibria of (1-Hexyl-3-methylimidazolium Thiocyanate + Water, Alcohol, or Hydrocarbon) Binary Systems. J. Chem. Eng. Data 2010, 55, 773–777.
[C6MIm][SCN]+hexane
[C6MIm][SCN]+hexane	299.6	0.9629	0.888005
[C6MIm][SCN]+hexane	308.3	0.9529	0.887896
[C6MIm][SCN]+hexane	313	0.9497	0.887836
[C6MIm][SCN]+hexane	316.3	0.9477	0.887793
[C6MIm][SCN]+hexane	320.6	0.9453	0.887713
[C6MIm][SCN]+hexane	321.1	0.9444	0.887716
[C6MIm][SCN]+hexane	324.3	0.9418	0.887676
[C6MIm][SCN]+hexane	329.9	0.9397	0.887596
[C6MIm][SCN]+hexane	333.5	0.9362	0.887543
[C6MIm][SCN]+hexane	341.1	0.9288	0.887428
[C6MIm][SCN]+hexane	351.2	0.9177	0.887271
[C6MIm][SCN]+hexane	359.4	0.9061	0.887155
[C6MIm][SCN]+hexane	367.3	0.8962	0.887029	0.0518	Domańska, U.; Kro´likowska, M.; Arasimowicz, M. Phase Equilibria of (1-Hexyl-3-methylimidazolium Thiocyanate + Water, Alcohol, or Hydrocarbon) Binary Systems. J. Chem. Eng. Data 2010, 55, 773–777.
[C4MPy][TOS]+hexane
[C4MPy][TOS]+hexane	384.68	0.8054	0.8759
[C4MPy][TOS]+hexane	378.99	0.8242	0.8776
[C4MPy][TOS]+hexane	373.49	0.8402	0.8783
[C4MPy][TOS]+hexane	370.11	0.8522	0.8792
[C4MPy][TOS]+hexane	367.94	0.8572	0.8804
[C4MPy][TOS]+hexane	365.68	0.8638	0.8806
[C4MPy][TOS]+hexane	360.88	0.8733	0.882
[C4MPy][TOS]+hexane	354.79	0.881	0.8837
[C4MPy][TOS]+hexane	346.49	0.8896	0.8851
[C4MPy][TOS]+hexane	336.44	0.893	0.8887	0.0016	Domańska, U.; Królikowski, M.; Pobudkowska, A.; Letchera, T.M. Phase Equilibria Study of the Binary Systems (N-Butyl-4-methylpyridinium Tosylate Ionic Liquid + Organic Solvent, or Water). J. Chem. Eng. Data 2009, 54, 1435–1441
[C4MPy][TOS]+heptane
[C4MPy][TOS]+heptane	386.98	0.8631	0.9085
[C4MPy][TOS]+heptane	379.53	0.8807	0.909
[C4MPy][TOS]+heptane	377.68	0.885	0.9094
[C4MPy][TOS]+heptane	374.83	0.8929	0.9102
[C4MPy][TOS]+heptane	372.03	0.9006	0.9104
[C4MPy][TOS]+heptane	366.52	0.9073	0.9115
[C4MPy][TOS]+heptane	362.82	0.9141	0.9122
[C4MPy][TOS]+heptane	357.83	0.9199	0.9131
[C4MPy][TOS]+heptane	352.99	0.9269	0.915
[C4MPy][TOS]+heptane	348.07	0.9324	0.9159
[C4MPy][TOS]+heptane	342.3	0.9364	0.9169
[C4MPy][TOS]+heptane	334.68	0.9434	0.9172
[C4MPy][TOS]+heptane	329.06	0.9481	0.9181	0.022	Domańska, U.; Królikowski, M.; Pobudkowska, A.; Letchera, T.M. Phase Equilibria Study of the Binary Systems (N-Butyl-4-methylpyridinium Tosylate Ionic Liquid + Organic Solvent, or Water). J. Chem. Eng. Data 2009, 54, 1435–1441
[C4MPy][TOS]+octane
[C4MPy][TOS]+octane	387.07	0.9335	0.9284
[C4MPy][TOS]+octane	383.11	0.9384	0.9289
[C4MPy][TOS]+octane	377.23	0.9431	0.9296
[C4MPy][TOS]+octane	372.26	0.9479	0.9303
[C4MPy][TOS]+octane	361.32	0.9545	0.9316
[C4MPy][TOS]+octane	355.18	0.9587	0.9323
[C4MPy][TOS]+octane	346.19	0.9645	0.9333
[C4MPy][TOS]+octane	337.93	0.9703	0.9342
[C4MPy][TOS]+octane	328.4	0.9751	0.9352	0.0252	Domańska, U.; Królikowski, M.; Pobudkowska, A.; Letchera, T.M. Phase Equilibria Study of the Binary Systems (N-Butyl-4-methylpyridinium Tosylate Ionic Liquid + Organic Solvent, or Water). J. Chem. Eng. Data 2009, 54, 1435–1441
[C4MPy][NTf2]+hexane
[C4MPy][NTf2]+hexane	294.2	0.8812	0.89965
[C4MPy][NTf2]+hexane	300.2	0.8771	0.89701
[C4MPy][NTf2]+hexane	311.3	0.8702	0.892063
[C4MPy][NTf2]+hexane	321.6	0.8511	0.887402
[C4MPy][NTf2]+hexane	329.2	0.8414	0.88392
[C4MPy][NTf2]+hexane	338.5	0.8326	0.879611
[C4MPy][NTf2]+hexane	347	0.8266	0.875629	0.0358	Domańska, U.; Królikowski, M.; Ramjugernatha D.; Letchera, T.M.; Tumbaa, K. Phase Equilibria and Modeling of Pyridinium-Based Ionic Liquid Solutions. J. Phys. Chem. B 2010, 114, 15011–15017.
[C4MPy][NTf2]+heptane
[C4MPy][NTf2]+heptane	292.3	0.93	0.938414
[C4MPy][NTf2]+heptane	304	0.9154	0.934791
[C4MPy][NTf2]+heptane	314.8	0.9004	0.931367
[C4MPy][NTf2]+heptane	327.2	0.8867	0.927344
[C4MPy][NTf2]+heptane	337.8	0.8765	0.923829
[C4MPy][NTf2]+heptane	346	0.8666	0.921063	0.0371	Domańska, U.; Królikowski, M.; Ramjugernatha D.; Letchera, T.M.; Tumbaa, K. Phase Equilibria and Modeling of Pyridinium-Based Ionic Liquid Solutions. J. Phys. Chem. B 2010, 114, 15011–15017.
[C4MPy][NTf2]+octane
[C4MPy][NTf2]+octane	302.7	0.9413	0.959121
[C4MPy][NTf2]+octane	312.8	0.9374	0.956881
[C4MPy][NTf2]+octane	327.8	0.9282	0.953447
[C4MPy][NTf2]+octane	336.7	0.9238	0.951349
[C4MPy][NTf2]+octane	347.6	0.9151	0.948721	0.0254	Domańska, U.; Królikowski, M.; Ramjugernatha D.; Letchera, T.M.; Tumbaa, K. Phase Equilibria and Modeling of Pyridinium-Based Ionic Liquid Solutions. J. Phys. Chem. B 2010, 114, 15011–15017.
[C4MPyr][C(CN)3]+heptane
[C4MPyr][C(CN)3]+heptane	306.3	0.975	0.9677
[C4MPyr][C(CN)3]+heptane	319.8	0.9647	0.9657
[C4MPyr][C(CN)3]+heptane	322.4	0.9518	0.9653
[C4MPyr][C(CN)3]+heptane	331.7	0.9437	0.9638	0.0126	Domańska, U.; Lukoshko, E.V.; Szydłowski. J. Phase behaviour of tricyanomethanide-based ionic liquids with alcohols and hydrocarbons. Fluid Phase Equilib. 2015, 387, 18-23.
[C4MMor][C(CN)3]+heptane
[C4MMor][C(CN)3]+heptane	308.1	0.9784	0.9827
[C4MMor][C(CN)3]+heptane	309.6	0.9771	0.9826
[C4MMor][C(CN)3]+heptane	321.1	0.9692	0.9822
[C4MMor][C(CN)3]+heptane	330.7	0.9628	0.9818	0.012	Domańska, U.; Lukoshko, E.V.; Szydłowski. J. Phase behaviour of tricyanomethanide-based ionic liquids with alcohols and hydrocarbons. Fluid Phase Equilib. 2015, 387, 18-23.
[C4MPy][TOS]+hexane
[C4MPy][TOS]+hexane	326.6	0.9295	0.8985
[C4MPy][TOS]+hexane	330.3	0.9189	0.8975
[C4MPy][TOS]+hexane	333.4	0.9133	0.8975
[C4MPy][TOS]+hexane	336	0.9035	0.8965
[C4MPy][TOS]+hexane	337.7	0.8952	0.8965
[C4MPy][TOS]+hexane	339.6	0.8902	0.8955
[C4MPy][TOS]+hexane	345	0.8793	0.8945
[C4MPy][TOS]+hexane	353.9	0.8633	0.8925	0.0188	Letchera, T.M.; Ramjugernatha D.; Tumbaa, K.; Królikowski, M.; Doman´skab M. (Solid + liquid) and (liquid + liquid) phase equilibria study and correlation of the binary systems {N-butyl-3-methylpyridinium tosylate + water, or + an alcohol, or + a hydrocarbon}. Fluid Phase Equilib. 2010, 294, 89–97.
[C4MPy][TOS]+heptane
[C4MPy][TOS]+heptane	325.7	0.9638	0.9245
[C4MPy][TOS]+heptane	332.4	0.9555	0.9235
[C4MPy][TOS]+heptane	339.6	0.9453	0.9225
[C4MPy][TOS]+heptane	349.6	0.9387	0.9205
[C4MPy][TOS]+heptane	357.6	0.9295	0.9195	0.0265	Letchera, T.M.; Ramjugernatha D.; Tumbaa, K.; Królikowski, M.; Doman´skab M. (Solid + liquid) and (liquid + liquid) phase equilibria study and correlation of the binary systems {N-butyl-3-methylpyridinium tosylate + water, or + an alcohol, or + a hydrocarbon}. Fluid Phase Equilib. 2010, 294, 89–97.
[C4MPy][TOS]+octane
[C4MPy][TOS]+octane	330.1	0.9741	0.9345
[C4MPy][TOS]+octane	335.3	0.9678	0.9345
[C4MPy][TOS]+octane	340.8	0.9622	0.9335
[C4MPy][TOS]+octane	347.6	0.9567	0.9335
[C4MPy][TOS]+octane	353.2	0.9526	0.9325	0.0298	Letchera, T.M.; Ramjugernatha D.; Tumbaa, K.; Królikowski, M.; Doman´skab M. (Solid + liquid) and (liquid + liquid) phase equilibria study and correlation of the binary systems {N-butyl-3-methylpyridinium tosylate + water, or + an alcohol, or + a hydrocarbon}. Fluid Phase Equilib. 2010, 294, 89–97.
[C3MPyr][CF3SO3]+heptane
[C3MPyr][CF3SO3]+heptane	351	0.8864	0.9285
[C3MPyr][CF3SO3]+heptane	350.8	0.8851	0.9285
[C3MPyr][CF3SO3]+heptane	351.3	0.8822	0.9285
[C3MPyr][CF3SO3]+heptane	352.4	0.8787	0.9285
[C3MPyr][CF3SO3]+heptane	354.9	0.8698	0.9285
[C3MPyr][CF3SO3]+heptane	356.6	0.853	0.9275
[C3MPyr][CF3SO3]+heptane	359.8	0.8387	0.9275
[C3MPyr][CF3SO3]+heptane	364.5	0.8168	0.9265	0.0682	Domańska, U.; Roguszewska, M.; Królikowski, M.; Ramjugernatha D.; Naidoo, P. Phase equilibria study of binary systems comprising an (ionic liquid + hydrocarbon). J. Chem. Thermodynamics. 2015, 83, 90–96.
[C4MIm][SCN]+cyclohexane
[C4MIm][SCN]+cyclohexane	381.99	0.9023	0.892754
[C4MIm][SCN]+cyclohexane	378.24	0.9097	0.892847
[C4MIm][SCN]+cyclohexane	374.23	0.9157	0.892946
[C4MIm][SCN]+cyclohexane	368.59	0.9227	0.893084
[C4MIm][SCN]+cyclohexane	364.38	0.9271	0.893185
[C4MIm][SCN]+cyclohexane	359.34	0.9322	0.893304
[C4MIm][SCN]+cyclohexane	349.56	0.9387	0.893543
[C4MIm][SCN]+cyclohexane	342.11	0.9432	0.8937
[C4MIm][SCN]+cyclohexane	335.95	0.9486	0.893837
[C4MIm][SCN]+cyclohexane	329.97	0.9527	0.893968
[C4MIm][SCN]+cyclohexane	319.43	0.9602	0.894191
[C4MIm][SCN]+cyclohexane	311.19	0.9665	0.894359
[C4MIm][SCN]+cyclohexane	305.44	0.9726	0.894472
[C4MIm][SCN]+cyclohexane	298.82	0.979	0.894607
[C4MIm][SCN]+cyclohexane	292.61	0.986	0.894707	0.0557	Domańska, U.; Laskowska, M.; Pobudkowska, A. Phase Equilibria Study of the Binary Systems (1-Butyl-3-methylimidazolium Thiocyanate Ionic Liquid + Organic Solvent, or Water). J. Phys. Chem. B 2009, 113, 6397-6404.
[C4MIm][SCN]+cycloheptane
[C4MIm][SCN]+cycloheptane	416.32	0.9277	0.937487
[C4MIm][SCN]+cycloheptane	411.27	0.9312	0.937578
[C4MIm][SCN]+cycloheptane	402.98	0.9368	0.937727
[C4MIm][SCN]+cycloheptane	396.87	0.9404	0.937836
[C4MIm][SCN]+cycloheptane	384.23	0.9447	0.938057
[C4MIm][SCN]+cycloheptane	378.69	0.9491	0.938152
[C4MIm][SCN]+cycloheptane	367.97	0.9541	0.938333
[C4MIm][SCN]+cycloheptane	353.77	0.9585	0.938571
[C4MIm][SCN]+cycloheptane	337.82	0.9632	0.938814
[C4MIm][SCN]+cycloheptane	326.72	0.9677	0.938982
[C4MIm][SCN]+cycloheptane	314.87	0.9724	0.939161
[C4MIm][SCN]+cycloheptane	307.5	0.9775	0.939259
[C4MIm][SCN]+cycloheptane	298.21	0.9833	0.939383
[C4MIm][SCN]+cycloheptane	290.91	0.989	0.939455	0.0258	Domańska, U.; Laskowska, M.; Pobudkowska, A. Phase Equilibria Study of the Binary Systems (1-Butyl-3-methylimidazolium Thiocyanate Ionic Liquid + Organic Solvent, or Water). J. Phys. Chem. B 2009, 113, 6397-6404.
[C6MIm][SCN]+cyclohexane
[C6MIm][SCN]+cyclohexane	305.6	0.9269	0.780446
[C6MIm][SCN]+cyclohexane	318.6	0.915	0.780225
[C6MIm][SCN]+cyclohexane	332.5	0.9022	0.779897
[C6MIm][SCN]+cyclohexane	341.5	0.8927	0.779704
[C6MIm][SCN]+cyclohexane	354.7	0.8817	0.779421
[C6MIm][SCN]+cyclohexane	364.9	0.8685	0.779171
[C6MIm][SCN]+cyclohexane	373.1	0.8553	0.778943
[C6MIm][SCN]+cyclohexane	376.5	0.8468	0.778878
[C6MIm][SCN]+cyclohexane	380.8	0.8346	0.778803
[C6MIm][SCN]+cyclohexane	386.6	0.8191	0.778662
[C6MIm][SCN]+cyclohexane	392.8	0.8012	0.778487
[C6MIm][SCN]+cyclohexane	397.2	0.7911	0.778379
[C6MIm][SCN]+cyclohexane	400.3	0.7815	0.778289
[C6MIm][SCN]+cyclohexane	407.8	0.7613	0.778119	0.0853	Domańska, U.; Kro´likowska, M.; Arasimowicz, M. Phase Equilibria of (1-Hexyl-3-methylimidazolium Thiocyanate + Water, Alcohol, or Hydrocarbon) Binary Systems. J. Chem. Eng. Data 2010, 55, 773–777.
[C6MIm][SCN]+cycloheptane
[C6MIm][SCN]+cycloheptane	279.6	0.9698	0.858314
[C6MIm][SCN]+cycloheptane	291.9	0.9573	0.858144
[C6MIm][SCN]+cycloheptane	309.8	0.9455	0.857874
[C6MIm][SCN]+cycloheptane	324	0.933	0.857641
[C6MIm][SCN]+cycloheptane	342.3	0.9203	0.85732
[C6MIm][SCN]+cycloheptane	353.6	0.9096	0.857113
[C6MIm][SCN]+cycloheptane	367.3	0.8995	0.856851
[C6MIm][SCN]+cycloheptane	381.7	0.8885	0.856566
[C6MIm][SCN]+cycloheptane	397	0.8755	0.856253
[C6MIm][SCN]+cycloheptane	411.1	0.864	0.855957	0.0675	Domańska, U.; Kro´likowska, M.; Arasimowicz, M. Phase Equilibria of (1-Hexyl-3-methylimidazolium Thiocyanate + Water, Alcohol, or Hydrocarbon) Binary Systems. J. Chem. Eng. Data 2010, 55, 773–777.
[C4MPy][NTf2]+cyclohexane
[C4MPy][NTf2]+cyclohexane	300.5	0.8163	0.820656
[C4MPy][NTf2]+cyclohexane	311.9	0.7962	0.813327
[C4MPy][NTf2]+cyclohexane	321	0.777	0.807438
[C4MPy][NTf2]+cyclohexane	327.9	0.7587	0.802952
[C4MPy][NTf2]+cyclohexane	334.6	0.7413	0.798579
[C4MPy][NTf2]+cyclohexane	340.8	0.7238	0.79452
[C4MPy][NTf2]+cyclohexane	346.6	0.7099	0.790712
[C4MPy][NTf2]+cyclohexane	353	0.6938	0.786498	0.0576	Domańska, U.; Królikowski, M.; Ramjugernatha D.; Letchera, T.M.; Tumbaa, K. Phase Equilibria and Modeling of Pyridinium-Based Ionic Liquid Solutions. J. Phys. Chem. B 2010, 114, 15011–15017.
(b) {IL (1) + aromatic}
Composition of the ternary systems	T/K	x1		RMSD	References
		exp.	cal.
[C4MIm][SCN]+benzene
[C4MIm][SCN]+benzene	281.07	0.3765	0.536045
[C4MIm][SCN]+benzene	286.71	0.3824	0.536301
[C4MIm][SCN]+benzene	297.81	0.3845	0.536953
[C4MIm][SCN]+benzene	303.97	0.3865	0.537404
[C4MIm][SCN]+benzene	307.8	0.3887	0.537652
[C4MIm][SCN]+benzene	311.24	0.3909	0.537866
[C4MIm][SCN]+benzene	317.41	0.393	0.538334
[C4MIm][SCN]+benzene	328.23	0.4036	0.539211
[C4MIm][SCN]+benzene	335.55	0.4131	0.539838
[C4MIm][SCN]+benzene	341.57	0.4155	0.540371
[C4MIm][SCN]+benzene	346.99	0.4166	0.540863	0.1432	Domańska, U.; Laskowska, M.; Pobudkowska, A. Phase Equilibria Study of the Binary Systems (1-Butyl-3-methylimidazolium Thiocyanate Ionic Liquid + Organic Solvent, or Water). J. Phys. Chem. B 2009, 113, 6397-6404.
[C4MIm][SCN]+toluene
[C4MIm][SCN]+toluene	281.28	0.6175	0.690373
[C4MIm][SCN]+toluene	295.09	0.6208	0.689932
[C4MIm][SCN]+toluene	309.83	0.6226	0.6898
[C4MIm][SCN]+toluene	323.51	0.6253	0.689926
[C4MIm][SCN]+toluene	335.02	0.6272	0.69018
[C4MIm][SCN]+toluene	345.18	0.629	0.690496	0.0665	Domańska, U.; Laskowska, M.; Pobudkowska, A. Phase Equilibria Study of the Binary Systems (1-Butyl-3-methylimidazolium Thiocyanate Ionic Liquid + Organic Solvent, or Water). J. Phys. Chem. B 2009, 113, 6397-6404.
[C4MIm][SCN]+ethylbenzene
[C4MIm][SCN]+ethylbenzene	280.06	0.75	0.725392
[C4MIm][SCN]+ethylbenzene	297.63	0.7534	0.728405
[C4MIm][SCN]+ethylbenzene	318.45	0.7568	0.732004
[C4MIm][SCN]+ethylbenzene	335.46	0.7604	0.734871	0.025	Domańska, U.; Laskowska, M.; Pobudkowska, A. Phase Equilibria Study of the Binary Systems (1-Butyl-3-methylimidazolium Thiocyanate Ionic Liquid + Organic Solvent, or Water). J. Phys. Chem. B 2009, 113, 6397-6404.
[C6MIm][SCN]+benzene
[C6MIm][SCN]+benzene	332.3	0.2784	0.425143
[C6MIm][SCN]+benzene	319.3	0.2734	0.425017
[C6MIm][SCN]+benzene	306.9	0.2694	0.425031
[C6MIm][SCN]+benzene	294.7	0.2643	0.425132
[C6MIm][SCN]+benzene	284.4	0.2609	0.425373
[C6MIm][SCN]+benzene	279.2	0.2598	0.425547	0.1576	Domańska, U.; Kro´likowska, M.; Arasimowicz, M. Phase Equilibria of (1-Hexyl-3-methylimidazolium Thiocyanate + Water, Alcohol, or Hydrocarbon) Binary Systems. J. Chem. Eng. Data 2010, 55, 773–777.
[C6MIm][SCN]+toluene
[C6MIm][SCN]+toluene	355.7	0.4356	0.566404
[C6MIm][SCN]+toluene	313.7	0.4184	0.567578
[C6MIm][SCN]+toluene	292.7	0.4137	0.568922
[C6MIm][SCN]+toluene	282.1	0.4092	0.569905
[C6MIm][SCN]+toluene	272.6	0.4047	0.571028
[C6MIm][SCN]+toluene	267.7	0.4003	0.571696
[C6MIm][SCN]+toluene	262.9	0.396	0.572414
[C6MIm][SCN]+toluene	259.6	0.392	0.572946
[C6MIm][SCN]+toluene	255.9	0.388	0.573581
[C6MIm][SCN]+toluene	252.8	0.3839	0.574149
[C6MIm][SCN]+toluene	248.9	0.3799	0.574848
[C6MIm][SCN]+toluene	245	0.3758	0.575646
[C6MIm][SCN]+toluene	240.1	0.3719	0.576737
[C6MIm][SCN]+toluene	239.6	0.3684	0.576853
[C6MIm][SCN]+toluene	236.8	0.3648	0.577526
[C6MIm][SCN]+toluene	233.9	0.3612	0.578258
[C6MIm][SCN]+toluene	229.6	0.3576	0.57941
[C6MIm][SCN]+toluene	226.1	0.3541	0.580413
[C6MIm][SCN]+toluene	221.8	0.3509	0.581726	0.1906	Domańska, U.; Kro´likowska, M.; Arasimowicz, M. Phase Equilibria of (1-Hexyl-3-methylimidazolium Thiocyanate + Water, Alcohol, or Hydrocarbon) Binary Systems. J. Chem. Eng. Data 2010, 55, 773–777.
[C6MIm][SCN]+ethylbeneze
[C6MIm][SCN]+ethylbeneze	359	0.5835	0.615962
[C6MIm][SCN]+ethylbeneze	332.7	0.5662	0.612439
[C6MIm][SCN]+ethylbeneze	300.4	0.5524	0.608176
[C6MIm][SCN]+ethylbeneze	272.7	0.5398	0.604837
[C6MIm][SCN]+ethylbeneze	261	0.531	0.603512
[C6MIm][SCN]+ethylbeneze	250.7	0.5222	0.60244
[C6MIm][SCN]+ethylbeneze	242.1	0.5161	0.601697
[C6MIm][SCN]+ethylbeneze	232.6	0.5101	0.600933
[C6MIm][SCN]+ethylbeneze	227	0.5033	0.600676
[C6MIm][SCN]+ethylbeneze	223.1	0.4968	0.600454
[C6MIm][SCN]+ethylbeneze	220.9	0.4867	0.600301
[C6MIm][SCN]+ethylbeneze	219.2	0.479	0.600223
[C6MIm][SCN]+ethylbeneze	217.7	0.4698	0.600159
[C6MIm][SCN]+ethylbeneze	216.3	0.4642	0.600104
[C6MIm][SCN]+ethylbeneze	214.2	0.4471	0.60003
[C6MIm][SCN]+ethylbeneze	211.7	0.4305	0.599955	0.104	Domańska, U.; Kro´likowska, M.; Arasimowicz, M. Phase Equilibria of (1-Hexyl-3-methylimidazolium Thiocyanate + Water, Alcohol, or Hydrocarbon) Binary Systems. J. Chem. Eng. Data 2010, 55, 773–777.
[C4MPy][TOS]+toluene
[C4MPy][TOS]+toluene	368.82	0.4031	0.59458
[C4MPy][TOS]+toluene	359.46	0.4089	0.597727
[C4MPy][TOS]+toluene	350.68	0.4146	0.600729
[C4MPy][TOS]+toluene	342.23	0.4203	0.603668
[C4MPy][TOS]+toluene	328.83	0.4277	0.608443
[C4MPy][TOS]+toluene	320.11	0.4318	0.611632
[C4MPy][TOS]+toluene	311.06	0.4381	0.615018
[C4MPy][TOS]+toluene	304.93	0.4448	0.617357	0.1826	Domańska, U.; Królikowski, M.; Pobudkowska, A.; Letchera, T.M. Phase Equilibria Study of the Binary Systems (N-Butyl-4-methylpyridinium Tosylate Ionic Liquid + Organic Solvent, or Water). J. Chem. Eng. Data 2009, 54, 1435–1441
[C4MPy][TOS]+ethylbenzene
[C4MPy][TOS]+ethylbenzene	378.51	0.5276	0.6893
[C4MPy][TOS]+ethylbenzene	366.49	0.5394	0.6948
[C4MPy][TOS]+ethylbenzene	356.16	0.5484	0.6995
[C4MPy][TOS]+ethylbenzene	347.38	0.5569	0.7038
[C4MPy][TOS]+ethylbenzene	339.07	0.5666	0.7079
[C4MPy][TOS]+ethylbenzene	328.66	0.5737	0.7128
[C4MPy][TOS]+ethylbenzene	316.22	0.5826	0.7195	0.1477	Domańska, U.; Królikowski, M.; Pobudkowska, A.; Letchera, T.M. Phase Equilibria Study of the Binary Systems (N-Butyl-4-methylpyridinium Tosylate Ionic Liquid + Organic Solvent, or Water). J. Chem. Eng. Data 2009, 54, 1435–1441
[C4MPy][TOS]+proylbenzene
[C4MPy][TOS]+proylbenzene	390.4	0.6526	0.836667
[C4MPy][TOS]+proylbenzene	384.62	0.6583	0.838635
[C4MPy][TOS]+proylbenzene	378.32	0.6633	0.840332
[C4MPy][TOS]+proylbenzene	372.88	0.67	0.841958
[C4MPy][TOS]+proylbenzene	367.66	0.6767	0.843208
[C4MPy][TOS]+proylbenzene	363.64	0.6811	0.845772
[C4MPy][TOS]+proylbenzene	355.38	0.688	0.848714
[C4MPy][TOS]+proylbenzene	345.88	0.6905	0.853769	0.1713	Domańska, U.; Królikowski, M.; Pobudkowska, A.; Letchera, T.M. Phase Equilibria Study of the Binary Systems (N-Butyl-4-methylpyridinium Tosylate Ionic Liquid + Organic Solvent, or Water). J. Chem. Eng. Data 2009, 54, 1435–1441
[C2MIm][NTf2]+benzene
[C2MIm][NTf2]+benzene	293.15	0.2238	0.285629
[C2MIm][NTf2]+benzene	298.15	0.2277	0.286866
[C2MIm][NTf2]+benzene	303.15	0.2267	0.287965
[C2MIm][NTf2]+benzene	308.15	0.227	0.288934
[C2MIm][NTf2]+benzene	313.15	0.2306	0.289783
[C2MIm][NTf2]+benzene	318.15	0.2291	0.290517
[C2MIm][NTf2]+benzene	323.15	0.2302	0.291142
[C2MIm][NTf2]+benzene	328.15	0.2344	0.291667
[C2MIm][NTf2]+benzene	333.15	0.2333	0.292097	0.0602	Gonzáleza, E.J.; Bottinib, S.B.; Peredab, S.; Macedo, E.A. Liquid–liquid equilibria of binary systems {benzene + [x-Mim][NTf2]ionic liquid}: Experimental data and thermodynamic modeling usinga group contribution equation of state. Fluid Phase Equilib. 2014, 362, 163– 169
[C6MIm][NTf2]+benzene
[C6MIm][NTf2]+benzene	293.15	0.1229	0.1631
[C6MIm][NTf2]+benzene	298.15	0.1231	0.1631
[C6MIm][NTf2]+benzene	303.15	0.1243	0.1621
[C6MIm][NTf2]+benzene	308.15	0.125	0.1624
[C6MIm][NTf2]+benzene	313.15	0.1252	0.1619
[C6MIm][NTf2]+benzene	318.15	0.1232	0.1616
[C6MIm][NTf2]+benzene	323.15	0.1223	0.1604
[C6MIm][NTf2]+benzene	328.15	0.1221	0.1601
[C6MIm][NTf2]+benzene	333.15	0.11747	0.1597	0.0388	Gonzáleza, E.J.; Bottinib, S.B.; Peredab, S.; Macedo, E.A. Liquid–liquid equilibria of binary systems {benzene + [x-Mim][NTf2]ionic liquid}: Experimental data and thermodynamic modeling usinga group contribution equation of state. Fluid Phase Equilib. 2014, 362, 163– 169
[C2MPy][NTf2]+benzene
[C2MPy][NTf2]+benzene	293.15	0.204	0.121598
[C2MPy][NTf2]+benzene	298.15	0.205	0.117346
[C2MPy][NTf2]+benzene	303.15	0.207	0.112792
[C2MPy][NTf2]+benzene	308.15	0.205	0.1079
[C2MPy][NTf2]+benzene	313.15	0.207	0.102618
[C2MPy][NTf2]+benzene	318.15	0.208	0.0968599
[C2MPy][NTf2]+benzene	323.15	0.211	0.0904809
[C2MPy][NTf2]+benzene	328.15	0.209	0.0832008	0.1039	Gonzáleza, E.J.; Requejo, P.F.; Domínguez, A.; Macedo, E.A. Phase equilibria of binary mixtures (ionic liquid + aromatic hydrocarbon): Effect of the structure of the components on the solubility. Fluid Phase Equilib. 2013, 360, 416-422.
[C2MPy][NTf2]+toluene
[C2MPy][NTf2]+toluene	293.15	0.295	0.205077
[C2MPy][NTf2]+toluene	298.15	0.296	0.209624
[C2MPy][NTf2]+toluene	303.15	0.298	0.213883
[C2MPy][NTf2]+toluene	308.15	0.297	0.217872
[C2MPy][NTf2]+toluene	313.15	0.3	0.221602
[C2MPy][NTf2]+toluene	318.15	0.302	0.225089
[C2MPy][NTf2]+toluene	323.15	0.295	0.228346
[C2MPy][NTf2]+toluene	328.15	0.301	0.231386
[C2MPy][NTf2]+toluene	333.15	0.3	0.23422	0.0779	Gonzáleza, E.J.; Requejo, P.F.; Domínguez, A.; Macedo, E.A. Phase equilibria of binary mixtures (ionic liquid + aromatic hydrocarbon): Effect of the structure of the components on the solubility. Fluid Phase Equilib. 2013, 360, 416-422.
[C2MPy][NTf2]+ethylbenzene
[C2MPy][NTf2]+ethylbenzene	293.15	0.409	0.477113
[C2MPy][NTf2]+ethylbenzene	298.15	0.41	0.479073
[C2MPy][NTf2]+ethylbenzene	303.15	0.414	0.48076
[C2MPy][NTf2]+ethylbenzene	308.15	0.413	0.482192
[C2MPy][NTf2]+ethylbenzene	313.15	0.417	0.483389
[C2MPy][NTf2]+ethylbenzene	318.15	0.419	0.484367
[C2MPy][NTf2]+ethylbenzene	323.15	0.421	0.48514
[C2MPy][NTf2]+ethylbenzene	328.15	0.416	0.485724
[C2MPy][NTf2]+ethylbenzene	333.15	0.425	0.48613		Gonzáleza, E.J.; Requejo, P.F.; Domínguez, A.; Macedo, E.A. Phase equilibria of binary mixtures (ionic liquid + aromatic hydrocarbon): Effect of the structure of the components on the solubility. Fluid Phase Equilib. 2013, 360, 416-422.
[C4MPy][NTf2]+toluene
[C4MPy][NTf2]+toluene	299.8	0.1983	0.140036
[C4MPy][NTf2]+toluene	289.2	0.1973	0.138874
[C4MPy][NTf2]+toluene	276.6	0.1962	0.136584
[C4MPy][NTf2]+toluene	268.3	0.1954	0.134134
[C4MPy][NTf2]+toluene	253.5	0.1941	0.125572	0.0613	Domańska, U.; Królikowski, M.; Ramjugernatha D.; Letchera, T.M.; Tumbaa, K. Phase Equilibria and Modeling of Pyridinium-Based Ionic Liquid Solutions. J. Phys. Chem. B 2010, 114, 15011–15017.
[C4MPy][NTf2]+ethylbenzene
[C4MPy][NTf2]+ethylbenzene	317.6	0.286	0.329001
[C4MPy][NTf2]+ethylbenzene	309.4	0.2842	0.328358
[C4MPy][NTf2]+ethylbenzene	303	0.2821	0.32744
[C4MPy][NTf2]+ethylbenzene	295.7	0.28	0.325904
[C4MPy][NTf2]+ethylbenzene	288.4	0.2779	0.323792
[C4MPy][NTf2]+ethylbenzene	283.4	0.2758	0.32198
[C4MPy][NTf2]+ethylbenzene	279.8	0.2739	0.320476
[C4MPy][NTf2]+ethylbenzene	276.4	0.272	0.318894
[C4MPy][NTf2]+ethylbenzene	272	0.2702	0.316599
[C4MPy][NTf2]+ethylbenzene	267.4	0.2683	0.313882
[C4MPy][NTf2]+ethylbenzene	263.5	0.2664	0.311307
[C4MPy][NTf2]+ethylbenzene	257.4	0.2638	0.306739	0.0453	Domańska, U.; Królikowski, M.; Ramjugernatha D.; Letchera, T.M.; Tumbaa, K. Phase Equilibria and Modeling of Pyridinium-Based Ionic Liquid Solutions. J. Phys. Chem. B 2010, 114, 15011–15017.
[C4MPy][NTf2]+propylbenzene
[C4MPy][NTf2]+propylbenzene	303.2	0.3623	0.5069
[C4MPy][NTf2]+propylbenzene	298.1	0.3589	0.5064
[C4MPy][NTf2]+propylbenzene	291.9	0.355	0.5054
[C4MPy][NTf2]+propylbenzene	285.5	0.3514	0.5039
[C4MPy][NTf2]+propylbenzene	279.8	0.3478	0.5023
[C4MPy][NTf2]+propylbenzene	275.4	0.3444	0.5017
[C4MPy][NTf2]+propylbenzene	270.6	0.341	0.4996
[C4MPy][NTf2]+propylbenzene	265.1	0.3376	0.4979	0.1533	Domańska, U.; Królikowski, M.; Ramjugernatha D.; Letchera, T.M.; Tumbaa, K. Phase Equilibria and Modeling of Pyridinium-Based Ionic Liquid Solutions. J. Phys. Chem. B 2010, 114, 15011–15017.
[C4MPyr][C(CN)3]+benzene
[C4MPyr][C(CN)3]+benzene	337.5	0.2359	0.3125
[C4MPyr][C(CN)3]+benzene	321.3	0.2355	0.3145
[C4MPyr][C(CN)3]+benzene	301.8	0.2348	0.3175
[C4MPyr][C(CN)3]+benzene	285.3	0.2342	0.3205	0.0812	Domańska, U.; Lukoshko, E.V.; Szydłowski. J. Phase behaviour of tricyanomethanide-based ionic liquids with alcohols and hydrocarbons. Fluid Phase Equilib. 2015, 387, 18-23.
[C4MPyr][C(CN)3]+toluene
[C4MPyr][C(CN)3]+toluene	332.3	0.3486	0.4425
[C4MPyr][C(CN)3]+toluene	330	0.3473	0.4435
[C4MPyr][C(CN)3]+toluene	304.1	0.3283	0.4505
[C4MPyr][C(CN)3]+toluene	298.7	0.3246	0.4525
[C4MPyr][C(CN)3]+toluene	292.8	0.3193	0.4545	0.1163	Domańska, U.; Lukoshko, E.V.; Szydłowski. J. Phase behaviour of tricyanomethanide-based ionic liquids with alcohols and hydrocarbons. Fluid Phase Equilib. 2015, 387, 18-23.
[C4MMor][C(CN)3]+benzene
[C4MMor][C(CN)3]+benzene	349.6	0.3066	0.4815
[C4MMor][C(CN)3]+benzene	311.4	0.2959	0.4995
[C4MMor][C(CN)3]+benzene	309.6	0.2955	0.5005
[C4MMor][C(CN)3]+benzene	284.5	0.2885	0.5135	0.2029	Domańska, U.; Lukoshko, E.V.; Szydłowski. J. Phase behaviour of tricyanomethanide-based ionic liquids with alcohols and hydrocarbons. Fluid Phase Equilib. 2015, 387, 18-23.
[C4MMor][C(CN)3]+ethylbenzene
[C4MMor][C(CN)3]+ethylbenzene	350.1	0.6417	0.6185
[C4MMor][C(CN)3]+ethylbenzene	334.2	0.6392	0.6225
[C4MMor][C(CN)3]+ethylbenzene	314.5	0.6357	0.6255
[C4MMor][C(CN)3]+ethylbenzene	299.9	0.6337	0.6285
[C4MMor][C(CN)3]+ethylbenzene	292.1	0.6322	0.6395	0.0142	Domańska, U.; Lukoshko, E.V.; Szydłowski. J. Phase behaviour of tricyanomethanide-based ionic liquids with alcohols and hydrocarbons. Fluid Phase Equilib. 2015, 387, 18-23.
[C4MPyr][FAP] +ethylbenzene
[C4MPyr][FAP] +ethylbenzene	292.7	0.615	0.7555
[C4MPyr][FAP] +ethylbenzene	303.2	0.5876	0.7505
[C4MPyr][FAP] +ethylbenzene	323.1	0.567	0.7605
[C4MPyr][FAP] +ethylbenzene	355.4	0.5386	0.7465
[C4MPyr][FAP] +ethylbenzene	383.2	0.5175	0.7355	0.1868	Domańska, U.; Lukoshko, E.V.; Królikowski, M. Phase behaviour of ionic liquid 1-butyl-1-methylpyrrolidinium tris(pentafluoroethyl)trifluorophosphate with alcohols, water and aromatic hydrocarbons. Fluid Phase Equilib. 2013, 345, 18-22.
[C4MPyr][FAP] +proylbenzene
[C4MPyr][FAP] +proylbenzene	290	0.8752	0.8835
[C4MPyr][FAP] +proylbenzene	305.7	0.8549	0.8795
[C4MPyr][FAP] +proylbenzene	328.4	0.8197	0.8725
[C4MPyr][FAP] +proylbenzene	344	0.8009	0.8685
[C4MPyr][FAP] +proylbenzene	355.4	0.7888	0.8655
[C4MPyr][FAP] +proylbenzene	370.2	0.7757	0.8615	0.0595	Domańska, U.; Lukoshko, E.V.; Królikowski, M. Phase behaviour of ionic liquid 1-butyl-1-methylpyrrolidinium tris(pentafluoroethyl)trifluorophosphate with alcohols, water and aromatic hydrocarbons. Fluid Phase Equilib. 2013, 345, 18-22.
[C4MPy][TOS]+benzene
[C4MPy][TOS]+benzene	301.5	0.3743	0.4951
[C4MPy][TOS]+benzene	310.1	0.3694	0.4927
[C4MPy][TOS]+benzene	319.7	0.3604	0.4903
[C4MPy][TOS]+benzene	322.8	0.3563	0.4895
[C4MPy][TOS]+benzene	330	0.3512	0.4877
[C4MPy][TOS]+benzene	338.6	0.346	0.4858
[C4MPy][TOS]+benzene	344.9	0.342	0.4844
[C4MPy][TOS]+benzene	350.7	0.3372	0.4831	0.1342	Letchera, T.M.; Ramjugernatha D.; Tumbaa, K.; Królikowski, M.; Doman´skab M. (Solid + liquid) and (liquid + liquid) phase equilibria study and correlation of the binary systems {N-butyl-3-methylpyridinium tosylate + water, or + an alcohol, or + a hydrocarbon}. Fluid Phase Equilib. 2010, 294, 89–97.
[C4MPy][TOS]+toluene
[C4MPy][TOS]+toluene	315.8	0.5463	0.6132
[C4MPy][TOS]+toluene	326.9	0.534	0.6091
[C4MPy][TOS]+toluene	344	0.5219	0.603
[C4MPy][TOS]+toluene	358.4	0.509	0.5981	0.0785	Letchera, T.M.; Ramjugernatha D.; Tumbaa, K.; Królikowski, M.; Doman´skab M. (Solid + liquid) and (liquid + liquid) phase equilibria study and correlation of the binary systems {N-butyl-3-methylpyridinium tosylate + water, or + an alcohol, or + a hydrocarbon}. Fluid Phase Equilib. 2010, 294, 89–97.
[C4MPy][TOS]+ethylbenzene
[C4MPy][TOS]+ethylbenzene	316.1	0.7043	0.7645
[C4MPy][TOS]+ethylbenzene	323.2	0.6984	0.7619
[C4MPy][TOS]+ethylbenzene	327.4	0.6922	0.7603
[C4MPy][TOS]+ethylbenzene	332.4	0.685	0.7584
[C4MPy][TOS]+ethylbenzene	343.3	0.6716	0.7543
[C4MPy][TOS]+ethylbenzene	345.1	0.6693	0.7536	0.0726	Letchera, T.M.; Ramjugernatha D.; Tumbaa, K.; Królikowski, M.; Doman´skab M. (Solid + liquid) and (liquid + liquid) phase equilibria study and correlation of the binary systems {N-butyl-3-methylpyridinium tosylate + water, or + an alcohol, or + a hydrocarbon}. Fluid Phase Equilib. 2010, 294, 89–97.
[C4MPy][TOS]+proylbenzene
[C4MPy][TOS]+proylbenzene	313.7	0.7708	0.8586
[C4MPy][TOS]+proylbenzene	322.8	0.7495	0.8558
[C4MPy][TOS]+proylbenzene	328.2	0.7383	0.8542
[C4MPy][TOS]+proylbenzene	336.3	0.7274	0.8516
[C4MPy][TOS]+proylbenzene	343.4	0.7129	0.8494
[C4MPy][TOS]+proylbenzene	351.7	0.7053	0.8469	0.1201	Letchera, T.M.; Ramjugernatha D.; Tumbaa, K.; Królikowski, M.; Doman´skab M. (Solid + liquid) and (liquid + liquid) phase equilibria study and correlation of the binary systems {N-butyl-3-methylpyridinium tosylate + water, or + an alcohol, or + a hydrocarbon}. Fluid Phase Equilib. 2010, 294, 89–97.
(c) {IL (1) + thiophene}
Composition of the ternary systems	T/K	x1		RMSD	References
		exp.	cal.
[C3OHPy][FAP]+thiophene
[C3OHPy][FAP]+thiophene	350.5	0.1773	0.2487
[C3OHPy][FAP]+thiophene	346.6	0.1802	0.2488
[C3OHPy][FAP]+thiophene	342.4	0.1833	0.2488
[C3OHPy][FAP]+thiophene	337.3	0.1868	0.2487
[C3OHPy][FAP]+thiophene	332.1	0.1903	0.2485
[C3OHPy][FAP]+thiophene	326.8	0.1952	0.2481
[C3OHPy][FAP]+thiophene	320.9	0.1995	0.2475
[C3OHPy][FAP]+thiophene	315.4	0.2041	0.2469
[C3OHPy][FAP]+thiophene	310.1	0.2086	0.2461
[C3OHPy][FAP]+thiophene	305	0.2131	0.2451
[C3OHPy][FAP]+thiophene	301	0.2175	0.2443
[C3OHPy][FAP]+thiophene	297.5	0.2212	0.2435
[C3OHPy][FAP]+thiophene	294.1	0.2255	0.2426
[C3OHPy][FAP]+thiophene	291.2	0.2294	0.2418
[C3OHPy][FAP]+thiophene	289.2	0.2324	0.2412
[C3OHPy][FAP]+thiophene	288.7	0.2333	0.2411	0.0451	Marciniak, A.; Karczemna, E. Influence of the ionic liquid structure on thiophene solubility. Fluid Phase Equilib. 2011, 307, 160–165.
[C2MIm][CF3SO3]+thiophene
[C2MIm][CF3SO3]+thiophene	283.1	0.2741	0.2335
[C2MIm][CF3SO3]+thiophene	288	0.2766	0.2405
[C2MIm][CF3SO3]+thiophene	292.6	0.2792	0.2465
[C2MIm][CF3SO3]+thiophene	296.3	0.281	0.2505
[C2MIm][CF3SO3]+thiophene	299.8	0.2832	0.2545
[C2MIm][CF3SO3]+thiophene	302.8	0.285	0.2585
[C2MIm][CF3SO3]+thiophene	306.9	0.2869	0.2625
[C2MIm][CF3SO3]+thiophene	311.3	0.2893	0.2675
[C2MIm][CF3SO3]+thiophene	317	0.2919	0.2725
[C2MIm][CF3SO3]+thiophene	323.2	0.2943	0.2785
[C2MIm][CF3SO3]+thiophene	327.8	0.2964	0.2825
[C2MIm][CF3SO3]+thiophene	331.4	0.2978	0.2845
[C2MIm][CF3SO3]+thiophene	334.3	0.299	0.2875
[C2MIm][CF3SO3]+thiophene	338	0.3004	0.2895
[C2MIm][CF3SO3]+thiophene	341.3	0.3013	0.2925
[C2MIm][CF3SO3]+thiophene	344.7	0.3021	0.2945
[C2MIm][CF3SO3]+thiophene	348.6	0.3029	0.2965	0.023	Marciniak, A.; Karczemna, E. Influence of the ionic liquid structure on thiophene solubility. Fluid Phase Equilib. 2011, 307, 160–165.
[C4MIm]][CF3SO3]+thiophene
[C4MIm]][CF3SO3]+thiophene	297.3	0.0024	0.004
[C4MIm]][CF3SO3]+thiophene	304	0.0025	0.005
[C4MIm]][CF3SO3]+thiophene	309	0.0029	0.005
[C4MIm]][CF3SO3]+thiophene	323.6	0.0037	0.006
[C4MIm]][CF3SO3]+thiophene	327.7	0.0038	0.007
[C4MIm]][CF3SO3]+thiophene	335.5	0.0044	0.008
[C4MIm]][CF3SO3]+thiophene	344	0.0049	0.008
[C4MIm]][CF3SO3]+thiophene	347.3	0.0052	0.009
[C4MIm]][CF3SO3]+thiophene	353.1	0.0055	0.009
[C4MIm]][CF3SO3]+thiophene	286.8	0.1907	0.051
[C4MIm]][CF3SO3]+thiophene	290.7	0.1914	0.055
[C4MIm]][CF3SO3]+thiophene	295.3	0.192	0.059
[C4MIm]][CF3SO3]+thiophene	300.5	0.1925	0.065
[C4MIm]][CF3SO3]+thiophene	307.2	0.1931	0.071
[C4MIm]][CF3SO3]+thiophene	314.3	0.1937	0.077
[C4MIm]][CF3SO3]+thiophene	319.5	0.1942	0.081
[C4MIm]][CF3SO3]+thiophene	326.7	0.1946	0.087
[C4MIm]][CF3SO3]+thiophene	335	0.1952	0.093
[C4MIm]][CF3SO3]+thiophene	342.6	0.1959	0.097	0.0874	Marciniak, A.; Karczemna, E. Influence of the ionic liquid structure on thiophene solubility. Fluid Phase Equilib. 2011, 307, 160–165.
[C4Pyr][CF3SO3]+thiophene
[C4Pyr][CF3SO3]+thiophene	285	0.1872	0.2935
[C4Pyr][CF3SO3]+thiophene	287.5	0.1878	0.2915
[C4Pyr][CF3SO3]+thiophene	291.9	0.1887	0.2875
[C4Pyr][CF3SO3]+thiophene	296.3	0.1896	0.2835
[C4Pyr][CF3SO3]+thiophene	300.8	0.1906	0.2805
[C4Pyr][CF3SO3]+thiophene	305.2	0.1917	0.2765
[C4Pyr][CF3SO3]+thiophene	309.4	0.1928	0.2735
[C4Pyr][CF3SO3]+thiophene	313	0.1937	0.2705
[C4Pyr][CF3SO3]+thiophene	317.1	0.1947	0.2675
[C4Pyr][CF3SO3]+thiophene	322.7	0.195	0.2635
[C4Pyr][CF3SO3]+thiophene	328.6	0.1968	0.2595
[C4Pyr][CF3SO3]+thiophene	333.7	0.1972	0.2555
[C4Pyr][CF3SO3]+thiophene	337.9	0.1976	0.2535
[C4Pyr][CF3SO3]+thiophene	342.8	0.1982	0.2495
[C4Pyr][CF3SO3]+thiophene	347.2	0.1985	0.2465	0.079	Marciniak, A.; Karczemna, E. Influence of the ionic liquid structure on thiophene solubility. Fluid Phase Equilib. 2011, 307, 160–165.
[C4Py][CF3SO3]+thiophene
[C4Py][CF3SO3]+thiophene	286.3	0.1792	0.2776
[C4Py][CF3SO3]+thiophene	289.4	0.1803	0.2728
[C4Py][CF3SO3]+thiophene	292.4	0.181	0.2683
[C4Py][CF3SO3]+thiophene	295	0.1817	0.2643
[C4Py][CF3SO3]+thiophene	298.7	0.1826	0.2585
[C4Py][CF3SO3]+thiophene	301.4	0.1833	0.2543
[C4Py][CF3SO3]+thiophene	305.8	0.1845	0.2474
[C4Py][CF3SO3]+thiophene	309.9	0.1857	0.2409
[C4Py][CF3SO3]+thiophene	313.9	0.1864	0.2345
[C4Py][CF3SO3]+thiophene	318.6	0.1871	0.2269
[C4Py][CF3SO3]+thiophene	323.4	0.1879	0.2191
[C4Py][CF3SO3]+thiophene	329.2	0.1887	0.2094
[C4Py][CF3SO3]+thiophene	334.3	0.1896	0.2008
[C4Py][CF3SO3]+thiophene	339.3	0.1903	0.1921
[C4Py][CF3SO3]+thiophene	345.1	0.1908	0.1818
[C4Py][CF3SO3]+thiophene	350.4	0.1913	0.172036	0.0594	Marciniak, A.; Karczemna, E. Influence of the ionic liquid structure on thiophene solubility. Fluid Phase Equilib. 2011, 307, 160–165.
[[C4MMor][C(CN)3]+thiophene
[[C4MMor][C(CN)3]+thiophene	293.2	0.2266	0.2968
[[C4MMor][C(CN)3]+thiophene	302.2	0.2301	0.2986
[[C4MMor][C(CN)3]+thiophene	315.4	0.2365	0.3006
[[C4MMor][C(CN)3]+thiophene	331.2	0.2437	0.3022
[[C4MMor][C(CN)3]+thiophene	333.4	0.2445	0.3023	0.064	Domańska, U.; Lukoshko, E.V.; Szydłowski. J. Phase behaviour of tricyanomethanide-based ionic liquids with alcohols and hydrocarbons. Fluid Phase Equilib. 2015, 387, 18-23.
[C4Py][TOS]+thiophene
[C4Py][TOS]+thiophene	296.8	0.1705	0.2655
[C4Py][TOS]+thiophene	306	0.1687	0.2645
[C4Py][TOS]+thiophene	313	0.167	0.2645
[C4Py][TOS]+thiophene	317.3	0.1654	0.2645
[C4Py][TOS]+thiophene	322.6	0.1637	0.2645
[C4Py][TOS]+thiophene	326	0.1622	0.2645
[C4Py][TOS]+thiophene	330.2	0.1607	0.2645
[C4Py][TOS]+thiophene	334.5	0.1595	0.2645
[C4Py][TOS]+thiophene	338.4	0.158	0.2645
[C4Py][TOS]+thiophene	341.5	0.1567	0.2645
[C4Py][TOS]+thiophene	345	0.1555	0.2645
[C4Py][TOS]+thiophene	348.9	0.1543	0.2645
[C4Py][TOS]+thiophene	351.7	0.1531	0.2645
[C4Py][TOS]+thiophene	355.5	0.152	0.2635	0.1041	Domańska, U.; Królikowski, M.; S´lesin´ska, K. Phase equilibria study of the binary systems (ionic liquid + thiophene): Desulphurization process. J. Chem. Thermodynamics 2009, 41, 1303–1311.
[C6Py][TOS]+thiophene
[C6Py][TOS]+thiophene	301.5	0.0167	0.0455
[C6Py][TOS]+thiophene	300.6	0.015	0.0455
[C6Py][TOS]+thiophene	299.4	0.0132	0.0455
[C6Py][TOS]+thiophene	297.6	0.0114	0.0455
[C6Py][TOS]+thiophene	295.2	0.01	0.0455
[C6Py][TOS]+thiophene	293.5	0.0088	0.0455	0.0331	Domańska, U.; Królikowski, M.; S´lesin´ska, K. Phase equilibria study of the binary systems (ionic liquid + thiophene): Desulphurization process. J. Chem. Thermodynamics 2009, 41, 1303–1311.
[C4Py]NTf2]+thiophene
[C4Py]NTf2]+thiophene	269	0.1427	0.091
[C4Py]NTf2]+thiophene	278	0.1402	0.0853
[C4Py]NTf2]+thiophene	287.6	0.1375	0.0786
[C4Py]NTf2]+thiophene	298.5	0.134	0.0699
[C4Py]NTf2]+thiophene	308.9	0.1295	0.0599	0.0602	Domańska, U.; Królikowski, M.; S´lesin´ska, K. Phase equilibria study of the binary systems (ionic liquid + thiophene): Desulphurization process. J. Chem. Thermodynamics 2009, 41, 1303–1311.
[C2MIm][SCN]+thiophene	355.3	0.3795	0.5135
[C2MIm][SCN]+thiophene	351.1	0.375	0.5135
[C2MIm][SCN]+thiophene	347.8	0.3708	0.5125
[C2MIm][SCN]+thiophene	344.2	0.3665	0.5125
[C2MIm][SCN]+thiophene	341.6	0.3629	0.5115
[C2MIm][SCN]+thiophene	338	0.3601	0.5115
[C2MIm][SCN]+thiophene	334.3	0.3525	0.5115
[C2MIm][SCN]+thiophene	330.2	0.3479	0.5095
[C2MIm][SCN]+thiophene	326	0.3429	0.5085
[C2MIm][SCN]+thiophene	321.2	0.3376	0.5085
[C2MIm][SCN]+thiophene	317.6	0.3323	0.5075
[C2MIm][SCN]+thiophene	309.9	0.3246	0.5055
[C2MIm][SCN]+thiophene	306.7	0.321	0.5055
[C2MIm][SCN]+thiophene	303.9	0.3171	0.5045
[C2MIm][SCN]+thiophene	301.5	0.3147	0.5045
[C2MIm][SCN]+thiophene	296.8	0.3094	0.5035
[C2MIm][SCN]+thiophene	291.1	0.3031	0.5015
[C2MIm][SCN]+thiophene	287.1	0.2967	0.5015
[C2MIm][SCN]+thiophene	283.6	0.2942	0.5005
[C2MIm][SCN]+thiophene	279.1	0.2881	0.4995
[C2MIm][SCN]+thiophene	278.2	0.2878	0.4985
[C2MIm][SCN]+thiophene	271.6	0.2812	0.4975
[C2MIm][SCN]+thiophene	265.8	0.2757	0.4955
[C2MIm][SCN]+thiophene	257.8	0.2663	0.4935
[C2MIm][SCN]+thiophene	251.6	0.2585	0.4915
[C2MIm][SCN]+thiophene	242.9	0.2462	0.4885
[C2MIm][SCN]+thiophene	236.6	0.2388	0.4865	0.1897	Domańska, U.; Królikowski, M.; S´lesin´ska, K. Phase equilibria study of the binary systems (ionic liquid + thiophene): Desulphurization process. J. Chem. Thermodynamics 2009, 41, 1303–1311.
[C4MIm][SCN]+thiophene
[C4MIm][SCN]+thiophene	354	0.2542	0.3645
[C4MIm][SCN]+thiophene	349.4	0.252	0.3635
[C4MIm][SCN]+thiophene	341.2	0.2493	0.3635
[C4MIm][SCN]+thiophene	332.9	0.247	0.3625
[C4MIm][SCN]+thiophene	326.2	0.2437	0.3615
[C4MIm][SCN]+thiophene	320.5	0.2404	0.3615
[C4MIm][SCN]+thiophene	315.3	0.2389	0.3605
[C4MIm][SCN]+thiophene	310.3	0.2356	0.3605
[C4MIm][SCN]+thiophene	303.3	0.2317	0.3595
[C4MIm][SCN]+thiophene	301.5	0.23	0.3605
[C4MIm][SCN]+thiophene	299.4	0.2281	0.3595
[C4MIm][SCN]+thiophene	295.8	0.225	0.3585
[C4MIm][SCN]+thiophene	291.6	0.2233	0.3585
[C4MIm][SCN]+thiophene	287.2	0.2211	0.3575
[C4MIm][SCN]+thiophene	281.5	0.2191	0.3565
[C4MIm][SCN]+thiophene	271.9	0.2152	0.3555
[C4MIm][SCN]+thiophene	274.6	0.2145	0.3565
[C4MIm][SCN]+thiophene	262.6	0.2048	0.3545
[C4MIm][SCN]+thiophene	249.8	0.1981	0.3525
[C4MIm][SCN]+thiophene	244.7	0.1947	0.3515
[C4MIm][SCN]+thiophene	233	0.1921	0.3495	0.1327	Domańska, U.; Królikowski, M.; S´lesin´ska, K. Phase equilibria study of the binary systems (ionic liquid + thiophene): Desulphurization process. J. Chem. Thermodynamics 2009, 41, 1303–1311.
[C6MIm][SCN]+thiophene
[C6MIm][SCN]+thiophene	364.7	0.164	0.2805
[C6MIm][SCN]+thiophene	362.5	0.1625	0.2805
[C6MIm][SCN]+thiophene	355.4	0.1607	0.2805
[C6MIm][SCN]+thiophene	352.4	0.1585	0.2805
[C6MIm][SCN]+thiophene	346.5	0.1553	0.2805
[C6MIm][SCN]+thiophene	320.6	0.1456	0.2785
[C6MIm][SCN]+thiophene	333.4	0.1453	0.2795
[C6MIm][SCN]+thiophene	303.8	0.1426	0.2775
[C6MIm][SCN]+thiophene	290.8	0.1413	0.2775
[C6MIm][SCN]+thiophene	279.1	0.1395	0.2765
[C6MIm][SCN]+thiophene	265.8	0.1376	0.2755
[C6MIm][SCN]+thiophene	253.3	0.1367	0.2745
[C6MIm][SCN]+thiophene	247.8	0.1341	0.2735	0.1304	Domańska, U.; Królikowski, M.; S´lesin´ska, K. Phase equilibria study of the binary systems (ionic liquid + thiophene): Desulphurization process. J. Chem. Thermodynamics 2009, 41, 1303–1311.

## Sheet: Table S5
Table S5. Interaction energies for cation – thiophene and anion – thiophene in the {functional/conventional IL + model fuel oil} systems.
Intermolecular interaction	Cation-thiophene (kJ/mol)	Anion-thiophene (kJ/mol)
Functional IL EDS system	-150.255	-266.604
Conventional IL EDS system	-145.547	-267.201
